# Supplementary material for: A Rh-catalyzed regio- and stereoselective route to enamides: benzamides as assembling reagents
Source: Royal Society of Chemistry journal article supplement (doi:10.1039/c4cc02155j), 2014-01-01
Supplement: c4cc02155j1.pdf [file c4cc02155j1.pdf]

## *Supporting Information*

### **Rh-Catalyzed Regio- and Stereoselective Route to Enamides: Benzamides as an Assembling Reagent**

Dong Jin Lee, Jinhwan Shin and Eun Jeong Yoo\*

*Department of Chemistry*

*Kangwon National University, Chuncheon 200-701, Republic of Korea*

E-mail: [ejyoo@kangwon.ac.kr](mailto:ejyoo@kangwon.ac.kr)

#### **CONTENTS**

|                                                                                                                                                                                   |    |
|-----------------------------------------------------------------------------------------------------------------------------------------------------------------------------------|----|
| <b>I. General Methods</b>                                                                                                                                                         | 2  |
| <b>II. Experimental Procedure</b>                                                                                                                                                 |    |
| II-1 Experimental Procedure for the Optimization Studies (Table S1)                                                                                                               | 2  |
| II-2 General Procedure for Rh <sub>2</sub> (esp) <sub>2</sub> catalyzed reaction of 4-phenyl-1-toluenesulfonyl-1,2,3-triazole with <i>N,N</i> -disubstituted benzamides (Table 1) | 3  |
| II-3 General Procedure for Rh <sub>2</sub> (esp) <sub>2</sub> catalyzed reaction of 1-sulfonyl-1,2,3-triazoles with <i>N,N</i> -dimethylbenzamide (Table 2)                       | 3  |
| II-4 Representative Experimental Procedure of the Scale-up Reactions                                                                                                              | 3  |
| II-5 General procedure for the reaction of enaminone with NaBH <sub>4</sub> (Scheme 3)                                                                                            | 3  |
| II-6 Representative Experimental Procedure of the One-pot Reactions                                                                                                               | 3  |
| II-7 Spectroscopic Data of Products 3 and 4 Obtained in this Study                                                                                                                | 4  |
| <b>Appendix</b>                                                                                                                                                                   |    |
| Copies of Spectral Data of Compounds Obtained in this Study                                                                                                                       | 15 |
| <b>(Acknowledgment.</b> We acknowledge the Korea Basic Science Institute (KBSI) for the mass analysis.)                                                                           |    |

## I. General Methods.

Unless otherwise stated, all commercial reagents and solvents were used without additional purification. Analytical thin layer chromatography (TLC) was performed on Merck precoated silica gel 60 F<sub>254</sub> plates. Visualization on TLC was achieved by use of UV light (254 nm). Flash column chromatography was undertaken on silica gel (Merck Kiesel gel 60 F<sub>254</sub> 400-630 mesh). <sup>1</sup>H NMR was recorded on Bruker DPX FT (300 and 400 MHz). Chemical shifts were quoted in parts per million (ppm) referenced to the appropriate solvent peak or 0.0 ppm for tetramethylsilane. The following abbreviations were used to describe peak splitting patterns when appropriate: br = broad, s = singlet, d = doublet, t = triplet, q = quartet, m = multiplet. Coupling constants, *J*, were reported in hertz unit (Hz). <sup>13</sup>C NMR was recorded on Bruker FT AM 400 (100 MHz) and was fully decoupled by broad band proton decoupling. Chemical shifts were reported in ppm referenced to the center line of a triplet at 77.0 ppm of chloroform-*d*. Infrared spectra were recorded on a JASCO FT/IR-460 plus FT-IR spectrometer. Frequencies are given in reciprocal centimeters (cm<sup>-1</sup>) and only selected absorbance is reported. High resolution mass spectra were recorded on a Jeol JMS-HX110/110A by using EI method.

## II. Experimental Procedure

**1. Experimental Procedure for the Optimization Studies (Table S1).** To a test tube with a triangular-shaped stir bar were added *N,N*-dimethylbenzamide (**1a**, 0.6 mmol, 89.4 mg), 1-methanesulfonyl-4-phenyl-1,2,3-triazole (**2a**, 0.2 mmol, 44.6 mg), and rhodium catalyst (1.0 mol %) and solvent (2.0 mL) under atmospheric conditions. After 4h at indicated temperature, the reaction mixture filtered through a pad of celite and concentrated in *vacuo*. The NMR yield of desired product **3a**, (*Z*)-*N*-(1-(dimethylamino)-3-oxo-1,3-diphenylprop-1-en-2-yl)methanesulfonamide, was determined by integration using an internal standard (CH<sub>2</sub>Br<sub>2</sub>).

**Table S1.** Optimization of the reaction conditions.<sup>[a]</sup>

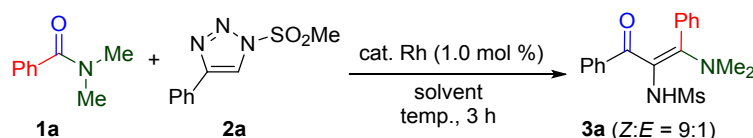

| entry | cat. [Rh]                          | solvent    | temp [°C] | yield [%] <sup>[b]</sup> |
|-------|------------------------------------|------------|-----------|--------------------------|
| 1     | Rh <sub>2</sub> (esp) <sub>2</sub> | 1,2-DCE    | 25        | n.d.                     |
| 2     | Rh <sub>2</sub> (esp) <sub>2</sub> | 1,2-DCE    | 40        | 50                       |
| 3     | Rh <sub>2</sub> (esp) <sub>2</sub> | 1,2-DCE    | 60        | 48                       |
| 4     | Rh <sub>2</sub> (esp) <sub>2</sub> | 1,2-DCE    | 80        | 63                       |
| 5     | Rh <sub>2</sub> (esp) <sub>2</sub> | 1,2-DCE    | 100       | 67                       |
| 6     | Rh <sub>2</sub> (OAc) <sub>4</sub> | 1,2-DCE    | 80        | n.d.                     |
| 7     | Rh <sub>2</sub> (Oct) <sub>4</sub> | 1,2-DCE    | 80        | n.d.                     |
| 8     | Rh <sub>2</sub> (esp) <sub>2</sub> | chloroform | 80        | n.d.                     |
| 9     | Rh <sub>2</sub> (esp) <sub>2</sub> | toluene    | 80        | 83 <sup>[c]</sup>        |
| 10    | Rh <sub>2</sub> (esp) <sub>2</sub> | 1,2-DCE    | 80        | n.d. <sup>[d]</sup>      |

[a] Reaction conditions: **1a** (3.0 equiv), **2a** (0.2 mmol), [Rh] catalyst (1.0 mol %) and solvent (2.0 mL). [b] <sup>1</sup>H NMR yields using CH<sub>2</sub>Br<sub>2</sub> as an internal standard. [c] 5.0 equiv of **1a** was used. [d] When *N,N*-dimethylacetamide was used instead of **1a**, corresponding product was not determined.

**2. General Procedure for Rh<sub>2</sub>(esp)<sub>2</sub> catalyzed reaction of 4-phenyl-1-toluenesulfonyl-1,2,3-triazole (2b) with *N,N*-disubstituted benzamides (Table 1).** To a test tube with a triangular-shaped stir bar were added 4-phenyl-1-toluenesulfonyl-1,2,3-triazole (**2b**, 0.5 mmol, 149.5 mg), *N,N*-disubstituted benzamide (**1**, 1.5 mmol) and Rh<sub>2</sub>(esp)<sub>2</sub> (1.0 mol%, 3.8 mg) and toluene (5.0 mL). The reaction mixture was stirred at 80 °C for 4 h, filtered through a pad of celite and then washed with CH<sub>2</sub>Cl<sub>2</sub> (10 mL x 3). Organic solvents were removed under reduced pressure and the residue was purified by chromatography on silica gel to give the desired product **3**.

**3. General Procedure for Rh<sub>2</sub>(esp)<sub>2</sub> catalyzed reaction of 1-sulfonyl-1,2,3-triazoles with *N,N*-dimethylbenzamide (1a) (Table 2).** To a test tube with a triangular-shaped stir bar were added *N,N*-dimethylbenzamide (**1a**, 1.0 mmol, 149.1 mg), 1-sulfonyl-1,2,3-triazole (**1**, 0.2 mmol), and Rh<sub>2</sub>(esp)<sub>2</sub> (1.0 mol%, 1.5 mg) and toluene (2.0 mL). The reaction mixture was stirred at 80 °C for 4 h, filtered through a pad of celite and then washed with CH<sub>2</sub>Cl<sub>2</sub> (10 mL x 3). Organic solvents were removed under reduced pressure and the residue was purified by chromatography on silica gel to give the desired product **3**.

**4. Representative Experimental Procedure of the Scale-up Reactions.** To a round bottom flask with an octagon-shaped stir bar were added *N,N*-dimethylbenzamide (**1a**, 9.0 mmol, 1.3427 g), 4-phenyl-1-toluenesulfonyl-1,2,3-triazole (**2b**, 3.0 mmol, 898.0 mg), and Rh<sub>2</sub>(esp)<sub>2</sub> (0.5 mol%, 11.8 mg) and toluene (30 mL). The reaction mixture was stirred at 80 °C for 4 h, filtered through a pad of celite and then washed with CH<sub>2</sub>Cl<sub>2</sub> (10 mL x 3). Organic solvents were removed under reduced pressure and the residue was purified by chromatography on silica gel to give the desired product **3b** in 83% (1.04 g).

**5. General procedure for the reaction of endiamines with NaBH<sub>4</sub> (Scheme 3).** To 10 mL round bottom flask with a stir bar were added endiamines **3** (0.3 mmol), NaBH<sub>4</sub> (1.2 mmol) and acetic acid (2.0 mL) under N<sub>2</sub> atmosphere. The reaction mixture was stirred at room temperature for 4 h, and then neutralized with an aqueous solution of 10% NaOH. The reaction mixture was extracted with CH<sub>2</sub>Cl<sub>2</sub>, the organic phases were combined, dried over MgSO<sub>4</sub>, and concentrated. The residue was purified by chromatography on silica gel to give the corresponding product **4**.

**6. Representative Experimental Procedure of the One-pot Reactions.** To a test tube with a triangular-shaped stir bar were added *N,N*-dimethylbenzamide (**1a**, 1.5 mmol, 223.8 mg), 4-phenyl-1-toluenesulfonyl-1,2,3-triazole (**2b**, 0.5 mmol), and Rh<sub>2</sub>(esp)<sub>2</sub> (1.0 mol%, 1.5 mg) and toluene (2.0 mL). The reaction mixture was stirred at 80 °C for 4 h, and then toluene was removed under reduced pressure. To the above mixture, NaBH<sub>4</sub> (2.0 mmol, 75.7 mg) and acetic acid (2.0 mL) under N<sub>2</sub> atmosphere were added. The reaction mixture was stirred at room temperature for 4 h, and then neutralized with an aqueous solution of 10% NaOH. The reaction mixture was extracted with CH<sub>2</sub>Cl<sub>2</sub>, the organic phases were combined, dried over MgSO<sub>4</sub>, and concentrated. The residue was purified by chromatography on silica gel to give the corresponding product **4a** in 82%.

## 7. Spectroscopic Data of Products **3** and **4** Obtained in this Study

**(Z)-N-(1-(dimethylamino)-3-oxo-1,3-diphenylprop-1-en-2-yl)methanesulfonamide (3a):**

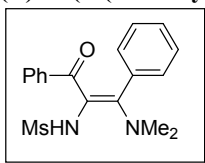

yellow solid (83%); <sup>1</sup>H NMR (400 MHz, CDCl<sub>3</sub>) δ 7.10-7.08 (m, 3H), 7.03-7.00 (m, 5H), 6.94-6.91 (m, 2H), 6.30 (s, 1H), 3.23 (s, 3H), 3.03 (s, 6H); <sup>13</sup>C NMR (100 MHz, CDCl<sub>3</sub>) δ 193.4, 166.7, 141.9, 136.6, 131.8, 130.7, 129.1, 128.1, 128.0, 127.2, 108.9, 44.0, 40.2, 29.6; IR (solid) ν 2927, 1444, 1512 1390, 1301, 1143 cm<sup>-1</sup>; HRMS (EI) m/z calcd. for C<sub>18</sub>H<sub>20</sub>N<sub>2</sub>O<sub>3</sub>S [*M*]: 344.1195, found: 344.1198.

**(Z)-N-(1-(dimethylamino)-3-oxo-1,3-diphenylprop-1-en-2-yl)-4-methylbenzenesulfonamide (3b):**

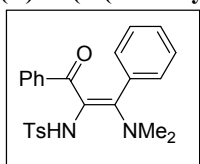

yellow solid (87%); <sup>1</sup>H NMR (400 MHz, CDCl<sub>3</sub>) δ 7.94 (d, *J* = 8.2 Hz 2H), 7.35 (d, *J* = 8.0 Hz 2H), 7.05-7.01 (m, 1H), 6.93-6.87 (m, 3H), 6.85-6.75 (m, 7H), 3.10 (s, 6H), 2.48 (s, 3H); <sup>13</sup>C NMR (100 MHz, CDCl<sub>3</sub>) δ 191.3, 164.7, 143.5, 141.5, 136.8, 136.2, 132.2, 130.7, 129.1, 128.6, 128.4, 127.8, 126.9, 109.2, 44.0, 29.7, 21.7; IR (solid) ν 3155, 1584, 1566, 1504, 1391, 1155 cm<sup>-1</sup>; HRMS (EI) m/z calcd. for C<sub>24</sub>H<sub>24</sub>N<sub>2</sub>O<sub>3</sub>S [*M*]: 420.1508, found: 420.1510.

**Figure S1.** ORTEP plot of **3b**

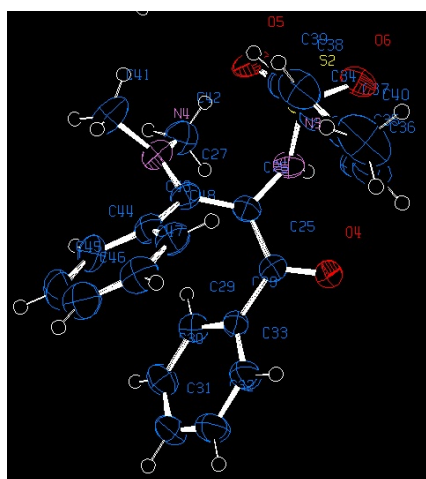

**(Z)-N-(1-(4-(tert-butyl)phenyl)-1-(dimethylamino)-3-oxo-3-phenylprop-1-en-2-yl)-4-methylbenzenesulfonamide (3c):**

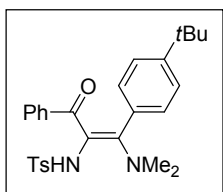

yellow solid (90%);  $^1\text{H}$  NMR (400 MHz,  $\text{CDCl}_3$ )  $\delta$  7.94 (d,  $J = 8.2$  Hz 2H), 7.35 (d,  $J = 8.0$  Hz 2H), 6.88-6.86 (m, 3H), 6.84-6.80 (m, 1H), 6.77-6.74 (m, 4H), 6.71-6.68 (m, 2H), 3.11 (s, 6H), 2.49 (s, 3H), 1.11 (s, 9H);  $^{13}\text{C}$  NMR (100 MHz,  $\text{CDCl}_3$ )  $\delta$  191.2, 164.7, 154.0, 143.4, 141.6, 136.7, 133.1, 132.2, 129.0, 128.5, 128.2, 127.6, 126.8, 124.7, 109.1, 44.0, 34.6, 30.7, 21.7; IR (solid)  $\nu$  2960, 2922, 2854, 1595, 1529, 1392  $\text{cm}^{-1}$ ; HRMS (EI)  $m/z$  calcd. for  $\text{C}_{28}\text{H}_{32}\text{N}_2\text{O}_3\text{S}$  [ $M$ ]: 476.2134, found: 476.2133.

**(Z)-N-(1-(dimethylamino)-3-oxo-3-phenyl-1-(p-tolyl)prop-1-en-2-yl)-4-methylbenzenesulfonamide (3d):**

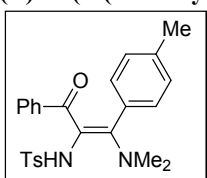

yellow solid (73%);  $^1\text{H}$  NMR (400 MHz,  $\text{CDCl}_3$ )  $\delta$  7.93 (d,  $J = 8.2$  Hz 2H), 7.33 (d,  $J = 8.0$  Hz 2H), 6.91-6.87 (m, 2H), 6.81-6.77 (m, 2H), 6.75-6.72 (m, 2H), 6.69 (m, 4H), 3.10 (s, 6H), 2.47 (s, 3H), 2.10 (s, 3H);  $^{13}\text{C}$  NMR (100 MHz,  $\text{CDCl}_3$ )  $\delta$  191.2, 164.7, 143.5, 141.6, 141.2, 136.7, 133.3, 132.3, 129.0, 128.5, 128.4, 128.2, 127.7, 126.8, 108.9, 43.9, 21.7, 21.1; IR (solid)  $\nu$  1509, 1472, 1390, 1300, 1152, 1088  $\text{cm}^{-1}$ ; HRMS (EI)  $m/z$  calcd. for  $\text{C}_{25}\text{H}_{26}\text{N}_2\text{O}_3\text{S}$  [ $M$ ]: 434.1664, found: 434.1667.

**(Z)-N-(1-(dimethylamino)-1-(4-nitrophenyl)-3-oxo-3-phenylprop-1-en-2-yl)-4-methylbenzenesulfonamide (3e):**

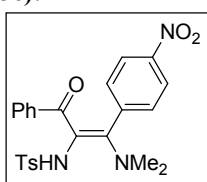

yellow solid (86%);  $^1\text{H}$  NMR (400 MHz,  $\text{CDCl}_3$ )  $\delta$  7.92 (d,  $J = 8.2$  Hz 2H), 7.76 (d,  $J = 8.7$  Hz 2H), 7.37 (d,  $J = 7.9$  Hz 2H), 7.04 (d,  $J = 8.6$  Hz 2H), 6.96-6.92 (m, 1H), 6.89 (s, 1H), 6.83 (t,  $J = 7.6$  Hz 2H), 6.77-6.75 (m, 2H), 3.07 (s, 6H), 2.50 (s, 3H);  $^{13}\text{C}$  NMR (100 MHz,  $\text{CDCl}_3$ )  $\delta$  191.4, 161.3, 148.4, 144.0, 142.8, 141.1, 136.6, 132.8, 129.4, 129.2, 128.3, 127.9, 127.4, 127.3, 122.8, 110.8, 43.9, 21.7; IR (solid)  $\nu$  1596, 1518, 1391, 1345, 1300, 1152  $\text{cm}^{-1}$ ; HRMS (EI)  $m/z$  calcd. for  $\text{C}_{24}\text{H}_{23}\text{N}_3\text{O}_5\text{S}$  [ $M$ ]: 465.1358, found: 465.1360.

**(Z)-N-(1-(dimethylamino)-3-oxo-3-phenyl-1-(m-tolyl)prop-1-en-2-yl)-4-methylbenzenesulfonamide (3f):**

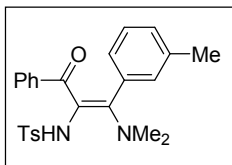

yellow solid (73%);  $^1\text{H}$  NMR (400 MHz,  $\text{CDCl}_3$ )  $\delta$  7.95 (d,  $J = 82$ . Hz 2H), 7.34 (d,  $J = 8.0$  Hz 2H), 6.94 (s, 1H), 6.89-6.85 (m, 1H), 6.81-6.78 (m, 4H), 6.75-6.71 (m, 3H), 6.37 (s, 1H), 3.11 (s, 6H), 2.48 (s, 3H), 1.98 (s, 3H);  $^{13}\text{C}$  NMR (100 MHz,  $\text{CDCl}_3$ )  $\delta$  191.1, 164.6, 143.5, 141.5, 137.2, 136.6, 135.9, 133.6, 131.3, 129.0, 128.9, 128.7, 128.3, 127.7, 127.6, 127.4, 126.7, 109.2, 43.9, 21.7, 20.6; IR (solid)  $\nu$  2922, 1596, 1520, 1388, 1298, 1287, 1154  $\text{cm}^{-1}$ ; HRMS (EI)  $m/z$  calcd. for  $\text{C}_{25}\text{H}_{26}\text{N}_2\text{O}_3\text{S}$  [ $M$ ]: 434.1664, found: 434.1662.

**(Z)-N-(1-(3-chlorophenyl)-1-(dimethylamino)-3-oxo-3-phenylprop-1-en-2-yl)-4-methylbenzenesulfonamide (3g):**

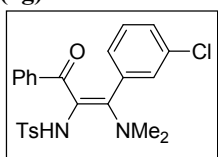

yellow solid (84%);  $^1\text{H}$  NMR (400 MHz,  $\text{CDCl}_3$ )  $\delta$  7.92 (d,  $J = 8.2$  Hz 2H), 7.36 (d,  $J = 8.0$  Hz 2H), 6.97-6.90 (m, 3H), 6.87-6.81 (m, 4H), 6.75-6.73 (m, 2H), 6.50 (s, 1H), 3.08 (s, 6H), 2.48 (s, 3H);  $^{13}\text{C}$  NMR (100 MHz,  $\text{CDCl}_3$ )  $\delta$  191.2, 162.4, 144.0, 141.2, 137.9, 136.3, 133.7, 132.5, 130.4, 129.8, 129.2, 129.0, 128.8, 128.5, 127.5, 127.1, 110.0, 43.9, 21.7; IR (solid)  $\nu$  1596, 1524, 1413, 1388, 1286, 1167, 1155  $\text{cm}^{-1}$ ; HRMS (EI)  $m/z$  calcd. for  $\text{C}_{24}\text{H}_{23}\text{ClN}_2\text{O}_3\text{S}$  [ $M$ ]: 454.1118, found: 454.1117.

**(Z)-N-(1-(3-bromophenyl)-1-(dimethylamino)-3-oxo-3-phenylprop-1-en-2-yl)-4-methylbenzenesulfonamide (3h):**

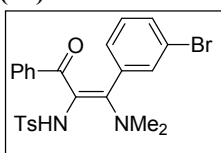

yellow solid (54%);  $^1\text{H}$  NMR (400 MHz,  $\text{CDCl}_3$ )  $\delta$  7.84 (d,  $J = 8.2$  Hz 2H), 7.29 (d,  $J = 8.0$  Hz 2H), 7.03 (d,  $J = 8.6$  Hz 1H), 6.87-6.77 (m, 5H), 6.74-6.70 (m, 1H), 6.67-6.65 (m, 2H), 6.57 (s, 1H), 3.01 (s, 6H), 2.41 (s, 3H);  $^{13}\text{C}$  NMR (100 MHz,  $\text{CDCl}_3$ )  $\delta$  191.2, 162.2, 144.0, 141.2, 138.1, 136.2, 135.4, 133.4, 130.1, 129.2, 129.2, 128.8, 128.5, 127.4, 127.1, 121.9, 110.0, 43.9, 21.8; IR (solid)  $\nu$  1595, 1522, 1409, 1388, 1316, 1287, 1154  $\text{cm}^{-1}$ ; HRMS (EI)  $m/z$  calcd. for  $\text{C}_{24}\text{H}_{23}\text{BrN}_2\text{O}_3\text{S}$  [ $M$ ]: 498.0613, found: 498.0611.

**(Z)-N-(1-(dimethylamino)-1-(naphthalen-2-yl)-3-oxo-3-phenylprop-1-en-2-yl)-4-methylbenzenesulfonamide (3i):**

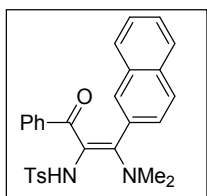

yellow solid (81%);  $^1\text{H NMR}$  (400 MHz,  $\text{CDCl}_3$ )  $\delta$  8.03 (d,  $J = 8.1$  Hz 2H), 7.56 (d,  $J = 7.6$  Hz 1H), 7.43-7.40 (m, 3H), 7.37-7.35 (m, 2H), 7.31-7.29 (m, 1H), 7.09-7.06 (m, 2H), 6.89 (s, 1H), 6.66-6.64 (m, 2H), 6.59-6.53 (m, 3H), 3.15 (s, 6H), 2.56 (s, 3H);  $^{13}\text{C NMR}$  (100 MHz,  $\text{CDCl}_3$ )  $\delta$  191.3, 164.0, 143.7, 141.5, 136.9, 134.4, 133.9, 133.7, 132.0, 129.2, 128.9, 128.0, 128.0, 127.6, 127.5, 127.4, 127.2, 127.1, 126.7, 126.3, 110.1, 43.9, 21.8; IR (solid)  $\nu$  1515, 1435, 1394, 1300, 1152, 1001  $\text{cm}^{-1}$ ; HRMS (EI)  $m/z$  calcd. for  $\text{C}_{28}\text{H}_{26}\text{N}_2\text{O}_3\text{S}$  [ $M$ ]: 470.1664, found: 470.1662.

**(Z)-N-(1-(4-bromophenyl)-1-(dimethylamino)-3-oxo-3-phenylprop-1-en-2-yl)-4-methylbenzenesulfonamide (3j):**

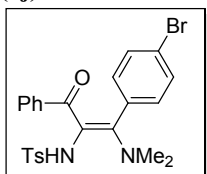

yellow solid (82%);  $^1\text{H NMR}$  (400 MHz,  $\text{CDCl}_3$ )  $\delta$  7.91 (d,  $J = 8.2$  Hz 2H), 7.33 (d,  $J = 7.9$  Hz 2H), 7.02 (d,  $J = 8.5$  Hz 2H), 6.99-6.96 (m, 1H), 6.88 (s, 1H), 6.85 (t,  $J = 7.6$  Hz 2H), 6.74-6.72 (m, 2H), 6.67 (d,  $J = 8.3$  Hz 2H), 3.06 (s, 6H), 2.47 (s, 3H);  $^{13}\text{C NMR}$  (100 MHz,  $\text{CDCl}_3$ )  $\delta$  191.3, 163.2, 143.7, 141.4, 136.7, 135.2, 133.4, 131.0, 129.1, 128.7, 128.4, 127.7, 127.1, 125.3, 109.6, 43.9, 21.7; IR (solid)  $\nu$  1586, 1516, 1443, 1391, 1300, 1152, 1089  $\text{cm}^{-1}$ ; HRMS (EI)  $m/z$  calcd. for  $\text{C}_{24}\text{H}_{23}\text{BrN}_2\text{O}_3\text{S}$  [ $M$ ]: 498.0613, found: 498.0609.

**(Z)-N-(1-(4-chlorophenyl)-1-(dimethylamino)-3-oxo-3-phenylprop-1-en-2-yl)-4-methylbenzenesulfonamide (3k):**

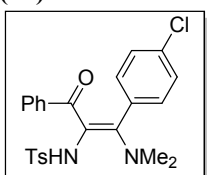

yellow solid (78%);  $^1\text{H NMR}$  (400 MHz,  $\text{CDCl}_3$ )  $\delta$  7.91 (d,  $J = 8.2$  Hz 2H), 7.33 (d,  $J = 8.0$  Hz 2H), 6.98-6.95 (m, 1H), 6.88-6.83 (m, 5H), 6.75-6.73 (m, 4H), 3.06 (s, 6H), 2.47 (s, 3H);  $^{13}\text{C NMR}$  (100 MHz,  $\text{CDCl}_3$ )  $\delta$  191.3, 163.1, 143.7, 141.4, 136.8, 136.7, 134.8, 133.3, 129.1, 128.8, 128.4, 128.0, 127.7, 127.1, 109.6, 43.9, 21.7; IR (solid)  $\nu$  1591, 1517, 1472, 1392, 1301, 1152, 1014  $\text{cm}^{-1}$ ; HRMS (EI)  $m/z$  calcd. for  $\text{C}_{24}\text{H}_{23}\text{ClN}_2\text{O}_3\text{S}$  [ $M$ ]: 454.1118, found: 454.1119.

**(Z)-N-(1-(dimethylamino)-1-(4-fluorophenyl)-3-oxo-3-phenylprop-1-en-2-yl)-4-methylbenzenesulfonamide (3l):**

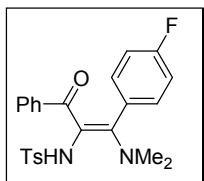

yellow solid (73%);  $^1\text{H}$  NMR (400 MHz,  $\text{CDCl}_3$ )  $\delta$  7.92 (d,  $J = 8.1$  Hz 2H), 7.34 (d,  $J = 8.0$  Hz 2H), 6.97-69.3 (m, 1H), 6.86-6.80 (m, 5H), 6.77-6.75 (m, 2H), 6.59 (t,  $J = 8.5$  Hz 2H), 3.08 (s, 6H), 2.48 (s, 3H);  $^{13}\text{C}$  NMR (100 MHz,  $\text{CDCl}_3$ )  $\delta$  191.3, 165.1, 163.2, 162.6, 143.6, 141.4, 136.7, 134.2, 134.1, 132.4, 132.4, 129.1, 128.8, 128.4, 127.7, 127.1, 115.1, 114.8, 109.4, 43.9, 21.7; IR (solid)  $\nu$  2922, 2853, 1589, 1512, 1389, 1290, 1150  $\text{cm}^{-1}$ ; HRMS (EI)  $m/z$  calcd. for  $\text{C}_{24}\text{H}_{23}\text{FN}_2\text{O}_3\text{S}$  [ $M$ ]: 438.1413, found: 438.1415.

**(Z)-4-methyl-N-(1-(methyl(phenyl)amino)-3-oxo-1,3-diphenylprop-1-en-2-yl)benzenesulfonamide (3m):**

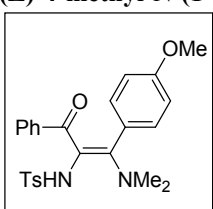

yellow solid (66%);  $^1\text{H}$  NMR (400 MHz,  $\text{CDCl}_3$ )  $\delta$  7.92 (d,  $J = 8.2$  Hz 2H), 7.33 (d,  $J = 8.0$  Hz 2H), 6.91-6.87 (m, 2H), 6.82 (t,  $J = 7.4$  Hz 2H), 6.77-6.73 (m, 4H), 6.41 (s, 1H), 6.38 (s, 1H), 3.63 (s, 3H), 3.09 (s, 6H), 2.47 (s, 3H);  $^{13}\text{C}$  NMR (100 MHz,  $\text{CDCl}_3$ )  $\delta$  191.0, 164.4, 161.6, 143.5, 141.6, 136.8, 133.9, 129.0, 128.5, 128.4, 128.4, 127.7, 126.9, 113.3, 108.6, 55.2, 43.9, 21.7; IR (solid)  $\nu$  2923, 1602, 1509, 1390, 1300, 1248, 1151  $\text{cm}^{-1}$ ; HRMS (EI)  $m/z$  calcd. for  $\text{C}_{25}\text{H}_{26}\text{N}_2\text{O}_4\text{S}$  [ $M$ ]: 450.1613, found: 450.1615.

**(Z)-N-(1-(benzyl(methyl)amino)-3-oxo-1,3-diphenylprop-1-en-2-yl)-4-methylbenzenesulfonamide (3n):**

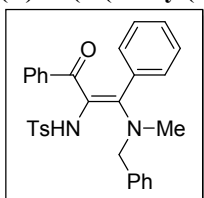

yellow solid (88%);  $^1\text{H}$  NMR (400 MHz,  $\text{CDCl}_3$ )  $\delta$  7.88 (d,  $J = 8.2$  Hz 2H), 7.37-7.21 (m, 7H), 6.93-6.89 (m, 1H), 6.87 (s, 1H), 6.81-6.74 (m, 5H), 6.67 (t,  $J = 7.5$  Hz 2H), 6.50 (d,  $J = 7.2$  Hz 2H), 4.60 (s, 2H), 2.77 (s, 3H), 2.38 (s, 3H);  $^{13}\text{C}$  NMR (100 MHz,  $\text{CDCl}_3$ )  $\delta$  191.0, 162.3, 142.6, 140.3, 136.0, 135.7, 135.6, 131.0, 129.7, 128.1, 127.7, 127.6, 127.4, 126.8, 126.6, 125.9, 109.7, 57.7, 40.8, 20.6; IR (solid)  $\nu$  1595, 1507, 1443, 1390, 1314, 1287, 1150  $\text{cm}^{-1}$ ; HRMS (EI)  $m/z$  calcd. for  $\text{C}_{30}\text{H}_{28}\text{N}_2\text{O}_3\text{S}$  [ $M$ ]: 496.1821, found: 496.1819.

**(Z)-4-methyl-N-(1-morpholino-3-oxo-1,3-diphenylprop-1-en-2-yl)benzenesulfonamide (3o):**



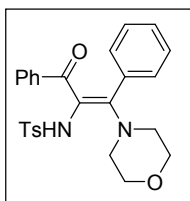

yellow solid (85%);  $^1\text{H}$  NMR (400 MHz,  $\text{CDCl}_3$ )  $\delta$  7.93 (d,  $J = 8.2$  Hz 2H), 7.35 (d,  $J = 8.1$  Hz 2H), 7.07-7.02 (m, 1H), 6.94-6.93 (m, 4H), 6.91-6.89 (m, 1H), 6.87 (s, 1H), 6.84-6.76 (m, 4H), 3.82 (t,  $J = 9.3$  Hz 4H), 3.40 (t,  $J = 8.5$  Hz 4H), 2.47 (s, 3H);  $^{13}\text{C}$  NMR (100 MHz,  $\text{CDCl}_3$ )  $\delta$  192.3, 163.8, 143.6, 141.2, 136.8, 135.9, 132.1, 131.0, 129.1, 128.9, 128.4, 128.1, 127.9, 127.0, 110.0, 67.1, 51.7, 21.7; IR (solid)  $\nu$  1594, 1508, 1487, 1315, 1285, 1270, 1251  $\text{cm}^{-1}$ ; HRMS (EI)  $m/z$  calcd. for  $\text{C}_{26}\text{H}_{26}\text{N}_2\text{O}_4\text{S}$  [ $M$ ]: 462.1613, found: 462.1617.

**(Z)-4-methyl-N-(3-oxo-1,3-diphenyl-1-(piperidin-1-yl)prop-1-en-2-yl)benzenesulfonamide (3p):**

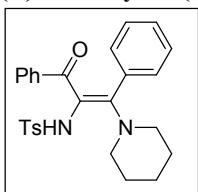

yellow solid (91%);  $^1\text{H}$  NMR (400 MHz,  $\text{CDCl}_3$ )  $\delta$  7.94(d,  $J = 8.2$  Hz 2H), 7.34 (d,  $J = 8.1$  Hz 2H), 7.04-7.00 (m, 1H), 6.92-6.87 (m, 6H), 6.82-6.75(m, 4H), 3.37 (s, 4H), 2.46 (s, 3H), 1.72 (s, 6H);  $^{13}\text{C}$  NMR (100 MHz,  $\text{CDCl}_3$ )  $\delta$  191.6, 164.9, 143.4, 141.5, 136.8, 131.9, 130.8, 129.0, 128.6, 128.4, 127.8, 127.8, 126.9, 109.5, 52.8, 26.7, 23.7, 21.7; IR (solid)  $\nu$  1595, 1500, 1442, 1299, 1269, 1251, 1149  $\text{cm}^{-1}$ ; HRMS (EI)  $m/z$  calcd. for  $\text{C}_{27}\text{H}_{28}\text{N}_2\text{O}_3\text{S}$  [ $M$ ]: 460.1821, found: 460.1821.

**(Z)-N-(1-(diethylamino)-3-oxo-1,3-diphenylprop-1-en-2-yl)-4-methylbenzenesulfonamide (3q):**

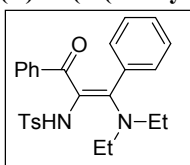

yellow solid (88%);  $^1\text{H}$  NMR (400 MHz,  $\text{CDCl}_3$ )  $\delta$  7.96 (d,  $J = 8.1$  Hz 2H), 7.35 (d,  $J = 8.1$  Hz 2H), 7.02-6.99 (m, 1H), 6.94 (s, 1H), 6.90-6.86 (m, 3H), 6.81-6.77 (m, 4H), 6.67-6.65 (m, 2H), 3.49 (q,  $J = 6.8$  Hz 4H), 2.47 (s, 3H), 1.23 (t,  $J = 7.1$  Hz 6H);  $^{13}\text{C}$  NMR (100 MHz,  $\text{CDCl}_3$ )  $\delta$  191.3, 162.2, 143.6, 142.0, 137.3, 136.7, 132.0, 130.3, 129.0, 128.5, 128.1, 127.6, 127.3, 126.9, 109.8, 47.0, 21.7, 13.4; IR (solid)  $\nu$  2924, 1505, 1458, 1443, 1313, 1278, 1150  $\text{cm}^{-1}$ ; HRMS (EI)  $m/z$  calcd. for  $\text{C}_{26}\text{H}_{28}\text{N}_2\text{O}_3\text{S}$  [ $M$ ]: 448.1821, found: 448.1823.

**(Z)-N-(3-(4-(tert-butyl)phenyl)-1-(dimethylamino)-3-oxo-1-phenylprop-1-en-2-yl)-4-methylbenzenesulfonamide (3r):**

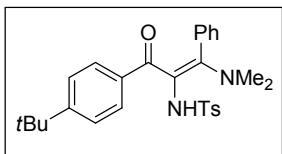

yellow solid (86%);  $^1\text{H NMR}$  (400 MHz,  $\text{CDCl}_3$ )  $\delta$  7.93 (d,  $J = 8.2$  Hz 2H), 7.34 (d,  $J = 8.0$  Hz 2H), 6.99-6.95 (m, 1H), 6.89-6.85 (m, 3H), 6.81-6.78 (m, 4H), 6.69-6.67 (m, 2H), 3.08 (s, 6H), 2.47 (s, 3H), 1.09 (s, 9H);  $^{13}\text{C NMR}$  (100 MHz,  $\text{CDCl}_3$ )  $\delta$  191.3, 164.4, 151.2, 143.5, 138.5, 136.7, 136.3, 132.2, 130.4, 129.0, 128.5, 127.7, 127.6, 123.8, 109.5, 43.9, 34.3, 30.8, 21.7; IR (solid)  $\nu$  2954, 1589, 1519, 1471, 1390, 1301, 1246  $\text{cm}^{-1}$ ; HRMS (EI)  $m/z$  calcd. for  $\text{C}_{28}\text{H}_{32}\text{N}_2\text{O}_3\text{S}$  [ $M$ ]: 476.2134, found: 476.2132.

**(Z)-N-(1-(dimethylamino)-3-(4-methoxyphenyl)-3-oxo-1-phenylprop-1-en-2-yl)-4-methylbenzenesulfonamide (3s):**

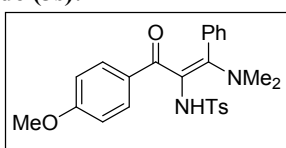

yellow solid (88%);  $^1\text{H NMR}$  (400 MHz,  $\text{CDCl}_3$ )  $\delta$  7.92 (d,  $J = 8.2$  Hz 2H), 7.33 (d,  $J = 8.0$  Hz 2H), 7.07-7.03 (m, 1H), 6.95-6.92 (m, 2H), 6.88-6.86 (m, 2H), 6.82-6.80 (m, 3H), 6.33 (d,  $J = 8.7$  Hz 2H), 3.60 (s, 3H), 3.08 (s, 6H), 2.47 (s, 3H);  $^{13}\text{C NMR}$  (100 MHz,  $\text{CDCl}_3$ )  $\delta$  190.7, 164.1, 160.0, 143.5, 136.9, 136.4, 134.1, 132.1, 130.6, 129.9, 129.0, 128.4, 127.7, 112.3, 109.2, 55.1, 43.8, 21.6; IR (solid)  $\nu$  2923, 1603, 1504, 1394, 1297, 1243, 1149  $\text{cm}^{-1}$ ; HRMS (EI)  $m/z$  calcd. for  $\text{C}_{25}\text{H}_{26}\text{N}_2\text{O}_4\text{S}$  [ $M$ ]: 450.1613, found: 450.1609.

**(Z)-N-(3-(4-bromophenyl)-1-(dimethylamino)-3-oxo-1-phenylprop-1-en-2-yl)-4-methylbenzenesulfonamide (3t):**

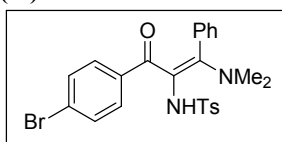

yellow solid (81%);  $^1\text{H NMR}$  (400 MHz,  $\text{CDCl}_3$ )  $\delta$  7.92 (d,  $J = 8.1$  Hz 2H), 7.34 (d,  $J = 7.9$  Hz 2H), 7.11 (t,  $J = 7.3$  Hz 1H), 6.97-6.91 (m, 4H), 6.85-6.82 (m, 3H), 6.61 (d,  $J = 8.3$  Hz 2H), 3.09 (s, 6H), 2.47 (s, 3H);  $^{13}\text{C NMR}$  (100 MHz,  $\text{CDCl}_3$ )  $\delta$  190.0, 164.9, 143.6, 140.4, 136.8, 136.1, 132.2, 130.9, 130.0, 129.3, 129.1, 128.4, 127.9, 122.8, 109.1, 44.0, 21.7; IR (solid)  $\nu$  2925, 1586, 1512, 1395, 1329, 1310, 1152  $\text{cm}^{-1}$ ; HRMS (EI)  $m/z$  calcd. for  $\text{C}_{24}\text{H}_{23}\text{BrN}_2\text{O}_3\text{S}$  [ $M$ ]: 498.0613, found: 498.0610.

**(Z)-N-(1-(dimethylamino)-3-(4-fluorophenyl)-3-oxo-1-phenylprop-1-en-2-yl)-4-methylbenzenesulfonamide (3u):**

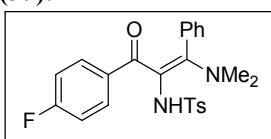

yellow solid (82%);  $^1\text{H NMR}$  (400 MHz,  $\text{CDCl}_3$ )  $\delta$  7.92 (d,  $J = 8.2$  Hz 2H), 7.34 (d,  $J = 8.0$  Hz 2H), 7.09-

7.06 (m, 1H), 6.94 (t,  $J = 7.7$  Hz 2H), 6.86-6.84 (m, 3H), 6.80-6.76 (m, 2H), 6.48 (t,  $J = 8.7$  Hz 2H), 3.08 (s, 6H), 2.46 (s, 3H);  $^{13}\text{C}$  NMR (100 MHz,  $\text{CDCl}_3$ )  $\delta$  190.0, 164.7, 163.7, 161.2, 143.6, 137.7, 137.7, 136.8, 136.2, 132.1, 130.9, 130.0, 129.9, 129.1, 128.4, 127.9, 114.0, 113.8, 109.1, 44.0, 21.7; IR (solid)  $\nu$  2919, 1597, 1575, 1512, 1386, 1327, 1312  $\text{cm}^{-1}$ ; HRMS (EI)  $m/z$  calcd. for  $\text{C}_{24}\text{H}_{23}\text{FN}_2\text{O}_3\text{S}$  [ $M$ ]: 438.1413, found: 438.1413.

**(Z)-N-(1-(dimethylamino)-3-oxo-1-phenyl-3-(4-(trifluoromethyl)phenyl)prop-1-en-2-yl)-4-methylbenzenesulfonamide (3v):**

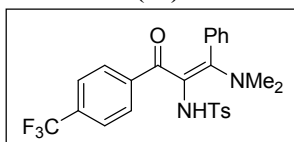

yellow solid (79%);  $^1\text{H}$  NMR (400 MHz,  $\text{CDCl}_3$ )  $\delta$  7.94 (d,  $J = 8.2$  Hz 2H), 7.36 (d,  $J = 8.0$  Hz 2H), 7.07-7.03 (m, 3H), 6.91 (t,  $J = 7.7$  Hz 2H), 6.87 (s, 1H), 6.84-6.82 (m, 2H), 6.79 (d,  $J = 7.9$  Hz 2H), 3.11 (s, 6H), 2.48 (s, 3H);  $^{13}\text{C}$  NMR (100 MHz,  $\text{CDCl}_3$ )  $\delta$  189.7, 165.4, 145.0, 143.7, 136.7, 136.0, 132.1, 131.1, 129.1, 128.3, 128.0, 127.8, 123.9, 123.8, 109.3, 44.1, 21.7; IR (solid)  $\nu$  1591, 1523, 1394, 1315, 1151, 1106, 1059  $\text{cm}^{-1}$ ; HRMS (EI)  $m/z$  calcd. for  $\text{C}_{25}\text{H}_{23}\text{F}_3\text{N}_2\text{O}_3\text{S}$  [ $M$ ]: 488.1381, found: 488.1379.

**(Z)-N-(1-(dimethylamino)-3-oxo-1-phenyl-3-(m-tolyl)prop-1-en-2-yl)-4-methylbenzenesulfonamide (3w):**

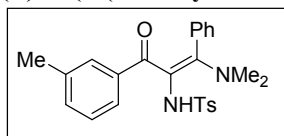

yellow solid (81%);  $^1\text{H}$  NMR (400 MHz,  $\text{CDCl}_3$ )  $\delta$  7.93 (d,  $J = 8.0$  Hz 2H), 7.34 (d,  $J = 7.9$  Hz 2H), 7.04-7.00 (m, 1H), 6.93-6.83 (m, 5H), 6.72-6.66 (m, 2H), 6.59-6.58 (m, 1H), 6.49 (s, 1H), 3.09 (s, 6H), 2.47 (s, 3H), 2.01 (s, 3H);  $^{13}\text{C}$  NMR (100 MHz,  $\text{CDCl}_3$ )  $\delta$  191.4, 164.5, 143.5, 141.3, 136.8, 136.3, 136.1, 132.1, 130.5, 129.2, 129.0, 128.5, 128.4, 127.6, 127.0, 124.8, 109.3, 44.0, 21.7, 20.8; IR (solid)  $\nu$  2920, 1516, 1392, 1308, 1281, 1214, 1151  $\text{cm}^{-1}$ ; HRMS (EI)  $m/z$  calcd. for  $\text{C}_{25}\text{H}_{26}\text{N}_2\text{O}_3\text{S}$  [ $M$ ]: 434.1664, found: 434.1661.

**(Z)-N-(1-(dimethylamino)-3-(3-fluorophenyl)-3-oxo-1-phenylprop-1-en-2-yl)-4-methylbenzenesulfonamide (3x):**

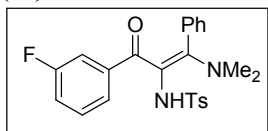

yellow solid (86%);  $^1\text{H}$  NMR (400 MHz,  $\text{CDCl}_3$ )  $\delta$  7.93 (d,  $J = 8.2$  Hz 2H), 7.35 (d,  $J = 8.0$  Hz 2H), 7.10-7.06 (m, 1H), 6.96 (t,  $J = 7.6$  Hz 2H), 6.88-6.86 (m, 2H), 6.81-6.75 (m, 2H), 6.60-6.54 (m, 2H), 6.41 (d,  $J = 9.3$  Hz 1H), 3.11 (s, 6H), 2.48 (s, 3H);  $^{13}\text{C}$  NMR (100 MHz,  $\text{CDCl}_3$ )  $\delta$  189.6, 189.6, 165.0, 162.4, 159.9, 143.7, 143.6, 136.7, 136.1, 132.2, 131.0, 129.1, 128.7, 128.6, 128.4, 127.9, 123.4, 123.4, 115.4, 115.2, 114.8, 114.6, 109.0, 44.1, 21.7; IR (solid)  $\nu$  2924, 1569, 1506, 1430, 1393, 1319, 1219  $\text{cm}^{-1}$ ; HRMS (EI)

m/z calcd. for  $C_{24}H_{23}FN_2O_3S$  [ $M$ ]: 438.1413, found: 438.1412.

**(Z)-N-(1-(dimethylamino)-3-oxo-1-phenyl-3-(thiophen-3-yl)prop-1-en-2-yl)-4-methylbenzenesulfonamide (3y):**

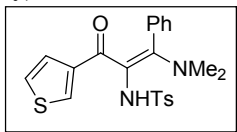

yellow solid (79%);  $^1H$  NMR (400 MHz,  $CDCl_3$ )  $\delta$  7.91 (d,  $J = 8.1$  Hz 2H), 7.33 (d,  $J = 8.0$  Hz 2H), 7.14-7.11 (m, 1H), 7.01 (t,  $J = 7.6$  Hz 2H), 6.95-6.93 (m, 2H), 6.86-6.85 (m, 1H), 6.81 (s, 1H), 6.70-6.68 (m, 1H), 6.54 (d,  $J = 5.0$  Hz 1H), 3.09 (s, 6H), 2.46 (s, 3H);  $^{13}C$  NMR (100 MHz,  $CDCl_3$ )  $\delta$  185.5, 164.4, 143.5, 143.0, 136.9, 136.3, 132.0, 130.8, 129.1, 128.4, 127.9, 127.3, 124.2, 110.2, 43.9, 21.7; IR (solid)  $\nu$  2922, 1508, 1385, 1286, 1206, 1147, 1088  $cm^{-1}$ ; HRMS (EI) m/z calcd. for  $C_{22}H_{22}N_2O_3S_2$  [ $M$ ]: 426.1072, found: 426.1072.

**(Z)-N-(1-(dimethylamino)-3-oxo-1,3-diphenylprop-1-en-2-yl)benzenesulfonamide (3z):**

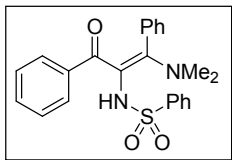

yellow solid (80%);  $^1H$  NMR (400 MHz,  $CDCl_3$ )  $\delta$  8.07 (d,  $J = 7.3$  Hz 2H), 7.66-7.63 (m, 1H), 7.58-7.54 (m, 2H), 7.04-7.00 (m, 1H), 6.93-6.86 (m, 4H), 6.82-6.73 (m, 6H), 3.10 (s, 6H);  $^{13}C$  NMR (100 MHz,  $CDCl_3$ )  $\delta$  191.2, 164.7, 141.4, 139.6, 136.1, 132.9, 132.2, 130.8, 128.6, 128.5, 128.4, 127.8, 127.7, 127.0, 109.0, 44.0; IR (solid)  $\nu$  2924, 1507, 1394, 1321, 1153, 1115, 1088  $cm^{-1}$ ; HRMS (EI) m/z calcd. for  $C_{23}H_{22}N_2O_3S$  [ $M$ ]: 406.1351, found: 406.1355.

**(Z)-N-(1-(dimethylamino)-3-oxo-1,3-diphenylprop-1-en-2-yl)-4-(trifluoromethyl)benzenesulfonamide (3aa):**

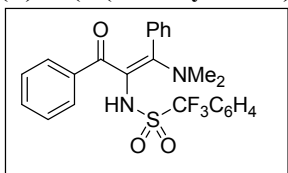

yellow solid (64%);  $^1H$  NMR (400 MHz,  $CDCl_3$ )  $\delta$  8.21 (d,  $J = 8.2$  Hz 2H), 7.82 (d,  $J = 8.2$  Hz 2H), 7.07-7.03 (s, 1H), 6.96-6.89 (m, 4H), 6.83-6.79 (m, 4H), 6.76-6.73 (m, 2H), 3.10 (s, 6H);  $^{13}C$  NMR (100 MHz,  $CDCl_3$ )  $\delta$  191.5, 165.3, 143.6, 141.2, 136.0, 132.0, 131.0, 129.0, 128.8, 127.9, 127.7, 127.1, 125.5, 125.4, 108.2, 44.0; IR (solid)  $\nu$  2923, 1516, 1395, 1319, 1156, 1125, 1105  $cm^{-1}$ ; HRMS (EI) m/z calcd. for  $C_{24}H_{21}F_3N_2O_3S$  [ $M$ ]: 474.1225, found: 474.1226.

**(Z)-N-(1-(dimethylamino)-3-oxo-1,3-diphenylprop-1-en-2-yl)-4-methoxybenzenesulfonamide (3ab):**

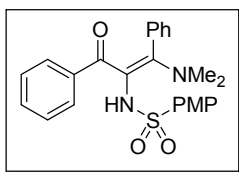

yellow solid (92%);  $^1\text{H}$  NMR (400 MHz,  $\text{CDCl}_3$ )  $\delta$  7.99 (d,  $J = 8.7$  Hz 2H), 7.03-7.01 (m, 3H), 6.93-6.77 (m, 10H), 3.90 (s, 3H), 3.10 (s, 6H);  $^{13}\text{C}$  NMR (100 MHz,  $\text{CDCl}_3$ )  $\delta$  191.4, 164.7, 163.1, 141.5, 136.2, 132.2, 131.4, 130.7, 130.6, 128.6, 127.8, 127.0, 113.6, 109.3, 55.6, 44.0; IR (solid)  $\nu$  2925, 1593, 1512, 1389, 1316, 1290, 1255  $\text{cm}^{-1}$ ; HRMS (EI)  $m/z$  calcd. for  $\text{C}_{24}\text{H}_{24}\text{N}_2\text{O}_4\text{S}$  [ $M$ ]: 436.1457, found: 436.1458.

**(Z)-N-(1-(dimethylamino)-3-oxo-1,3-diphenylprop-1-en-2-yl)butane-1-sulfonamide (3ac):**

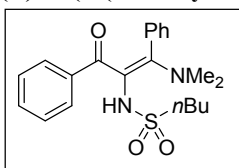

yellow solid (84%);  $^1\text{H}$  NMR (400 MHz,  $\text{CDCl}_3$ )  $\delta$  7.11-7.07 (m, 3H), 7.03-6.98 (m, 5H), 6.94-6.90 (m, 2H), 6.19 (s, 1H), 3.36-3.32 (m, 2H), 3.01 (s, 6H), 2.06-1.98 (m, 2H), 1.59-1.53 (m, 2H), 1.01 (t,  $J = 7.3$  Hz 3H);  $^{13}\text{C}$  NMR (100 MHz,  $\text{CDCl}_3$ )  $\delta$  193.4, 166.7, 142.1, 136.8, 131.8, 130.6, 129.0, 128.0, 127.9, 127.2, 109.0, 52.6, 44.0, 25.6, 21.8, 13.7; IR (solid)  $\nu$  2921, 2854, 1588, 1567, 1505, 1386, 1318  $\text{cm}^{-1}$ ; HRMS (EI)  $m/z$  calcd. for  $\text{C}_{21}\text{H}_{26}\text{N}_2\text{O}_3\text{S}$  [ $M$ ]: 386.1664, found: 386.1662.

**(Z)-4-methyl-N-(3-oxo-1,3-diphenylprop-1-en-2-yl)benzenesulfonamide (4a):**

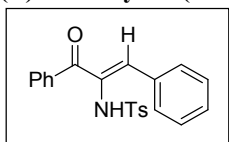

yellow solid (88%);  $^1\text{H}$  NMR (400 MHz,  $\text{CDCl}_3$ )  $\delta$  7.80-7.78 (m, 2H), 7.71 (d,  $J = 8.2$  Hz 2H), 7.57-7.52 (m, 3H), 7.44-7.40 (m, 2H), 7.37-7.35 (m, 3H), 7.18 (d,  $J = 8.0$  Hz 2H), 7.03 (s, 1H), 6.91 (s, 1H), 2.30 (s, 3H);  $^{13}\text{C}$  NMR (100 MHz,  $\text{CDCl}_3$ )  $\delta$  193.6, 144.1, 139.2, 136.3, 136.2, 132.7, 132.3, 131.3, 130.9, 130.6, 129.5, 129.1, 128.6, 128.3, 127.5, 21.5; IR (solid)  $\nu$  3233, 1644, 1623, 1595, 1404, 1263, 1171  $\text{cm}^{-1}$ ; HRMS (EI)  $m/z$  calcd. for  $\text{C}_{22}\text{H}_{19}\text{NO}_3\text{S}$  [ $M$ ]: 377.1072, found: 377.1088.

**(Z)-N-(1-(4-(tert-butyl)phenyl)-3-oxo-3-phenylprop-1-en-2-yl)-4-methylbenzenesulfonamide (4b):**

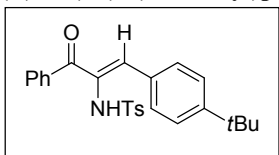

yellow solid (74%);  $^1\text{H}$  NMR (400 MHz,  $\text{CDCl}_3$ )  $\delta$  7.79 (d,  $J = 8.4$  Hz 2H), 7.73 (d,  $J = 8.2$  Hz 2H), 7.55-7.51 (m, 3H), 7.43-7.39 (m, 4H), 7.19 (d,  $J = 8.0$  Hz 2H), 7.04 (s, 1H), 6.88 (s, 1H), 2.31 (s, 3H), 1.32 (s, 9H);  $^{13}\text{C}$  NMR (100 MHz,  $\text{CDCl}_3$ )  $\delta$  193.7, 154.4, 144.0, 140.0, 136.5, 136.2, 132.2, 131.0, 130.5, 129.8,

129.5, 129.1, 128.3, 127.6, 125.6, 34.9, 31.1, 21.5; IR (solid)  $\nu$  2916, 1598, 1398, 1317, 1262, 1163, 1090  $\text{cm}^{-1}$ ; HRMS (EI)  $m/z$  calcd. for  $\text{C}_{26}\text{H}_{27}\text{NO}_3\text{S}$  [ $M$ ]: 433.1712, found: 433.1714.

**(Z)-4-methyl-N-(1-(4-nitrophenyl)-3-oxo-3-phenylprop-1-en-2-yl)benzenesulfonamide (4c):**

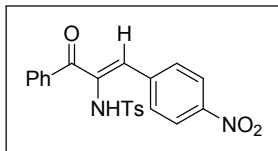

yellow solid (85%);  $^1\text{H}$  NMR (400 MHz,  $\text{DMSO-d}_6$ )  $\delta$  10.25 (s, 1H), 8.10 (d,  $J = 8.8$  Hz 2H), 7.80 (d,  $J = 7.3$  Hz 2H), 7.68-7.64 (m, 3H) 7.58-7.52 (m, 4H), 7.29 (d,  $J = 8.0$  Hz 2H), 6.93 (s, 1H) 2.33 (s, 3H);  $^{13}\text{C}$  NMR (100 MHz,  $\text{CDCl}_3$ )  $\delta$  193.2, 147.9, 144.6, 139.4, 135.9, 135.6, 135.5, 133.7, 132.8, 131.3, 129.7, 129.1, 128.5, 127.4, 123.5, 21.5; IR (solid)  $\nu$  1650, 1595, 1515, 1404, 1342, 1302, 1167  $\text{cm}^{-1}$ ; HRMS (EI)  $m/z$  calcd. for  $\text{C}_{22}\text{H}_{18}\text{N}_2\text{O}_5\text{S}$  [ $M$ ]: 422.0936, found: 422.0938.

**(Z)-N-(1-(4-fluorophenyl)-3-oxo-3-phenylprop-1-en-2-yl)-4-methylbenzenesulfonamide (4d):**

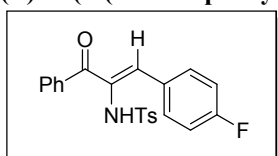

yellow solid (86%);  $^1\text{H}$  NMR (400 MHz,  $\text{CDCl}_3$ )  $\delta$  7.90-7.87 (m, 2H), 7.70 (d,  $J = 8.2$  Hz 2H), 7.56-7.52 (m, 1H), 7.51-7.48 (m, 2H), 7.44-7.40 (m, 2H), 7.81 (d,  $J = 8.0$  Hz 2H), 7.07-7.03 (m, 3H), 6.97 (s, 1H), 2.30 (s, 3H);  $^{13}\text{C}$  NMR (100 MHz,  $\text{CDCl}_3$ )  $\delta$  193.7, 165.1, 162.6, 144.2, 139.4, 136.2, 135.9, 133.4, 133.3, 132.3, 130.7, 130.7, 129.5, 129.0, 128.4, 127.5, 115.8, 115.6, 21.5; IR (solid)  $\nu$  1623, 1597, 1445, 1337, 1305, 1263, 1230  $\text{cm}^{-1}$ ; HRMS (EI)  $m/z$  calcd. for  $\text{C}_{22}\text{H}_{18}\text{FNO}_3\text{S}$  [ $M$ ]: 395.0991, found: 395.0994.

**(Z)-N-(1-(3-chlorophenyl)-3-oxo-3-phenylprop-1-en-2-yl)-4-methylbenzenesulfonamide (4e):**

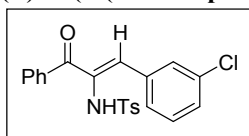

yellow solid (81%);  $^1\text{H}$  NMR (400 MHz,  $\text{CDCl}_3$ )  $\delta$  7.76-7.73 (m, 1H), 7.69 (d,  $J = 8.3$  Hz 2H), 7.59 (s, 1H), 7.57-7.54 (m, 3H), 7.45-7.42 (m, 2H), 7.31-7.30 (m, 2H), 7.20 (d,  $J = 8.0$  Hz 2H), 6.94 (s, 1H), 6.92 (s, 1H), 2.33 (s, 3H);  $^{13}\text{C}$  NMR (100 MHz,  $\text{CDCl}_3$ )  $\delta$  193.5, 144.3, 137.1, 136.0, 136.0, 134.5, 134.4, 132.5, 132.3, 130.5, 130.2, 129.8, 129.6, 129.1, 128.6, 128.4, 127.5, 21.5; IR (solid)  $\nu$  2924, 1667, 1613, 1594, 1427, 1340, 1204  $\text{cm}^{-1}$ ; HRMS (EI)  $m/z$  calcd. for  $\text{C}_{22}\text{H}_{18}\text{ClNO}_3\text{S}$  [ $M$ ]: 411.0696, found: 411.0698.

# Appendix

Copies of  $^1\text{H}$  and  $^{13}\text{C}$  NMR Spectra of  
Compounds Obtained in this Study

**(Z)-N-(1-(dimethylamino)-3-oxo-1,3-diphenylprop-1-en-2-yl)methanesulfonamide (3a):**

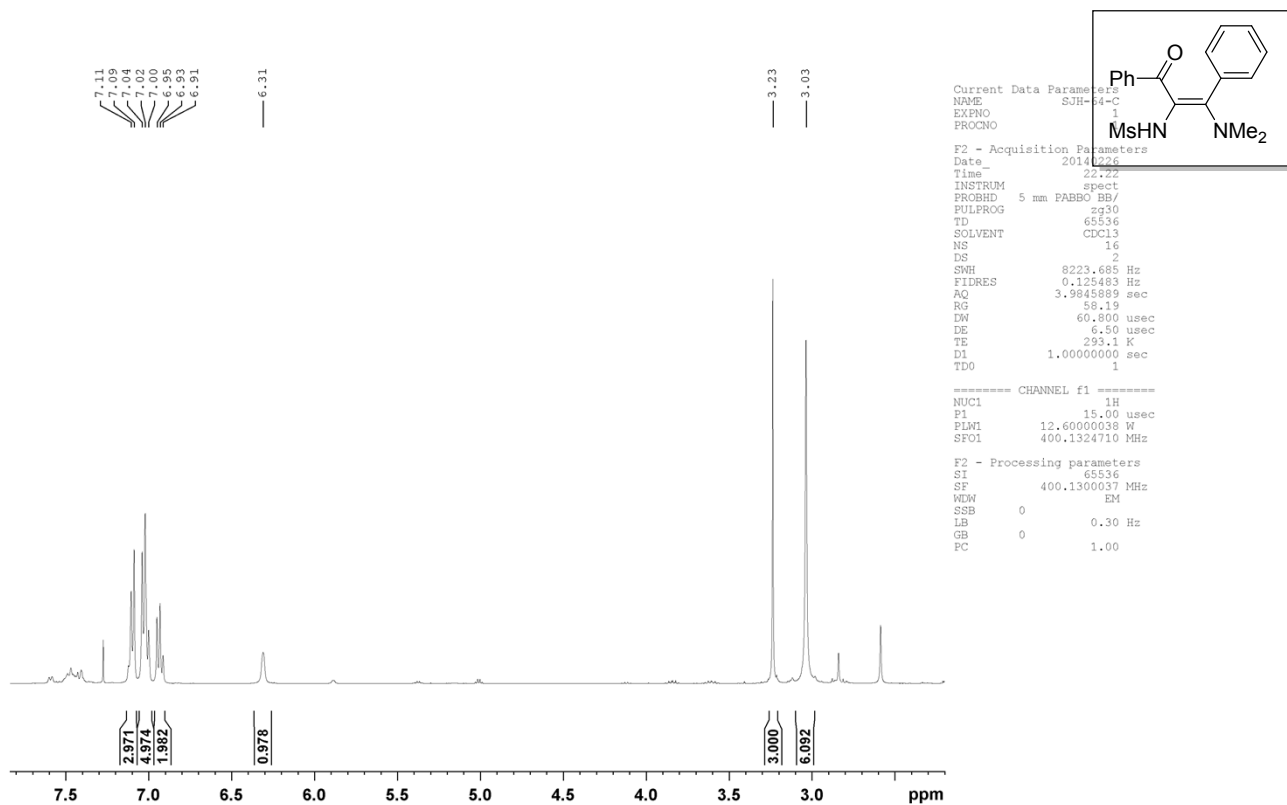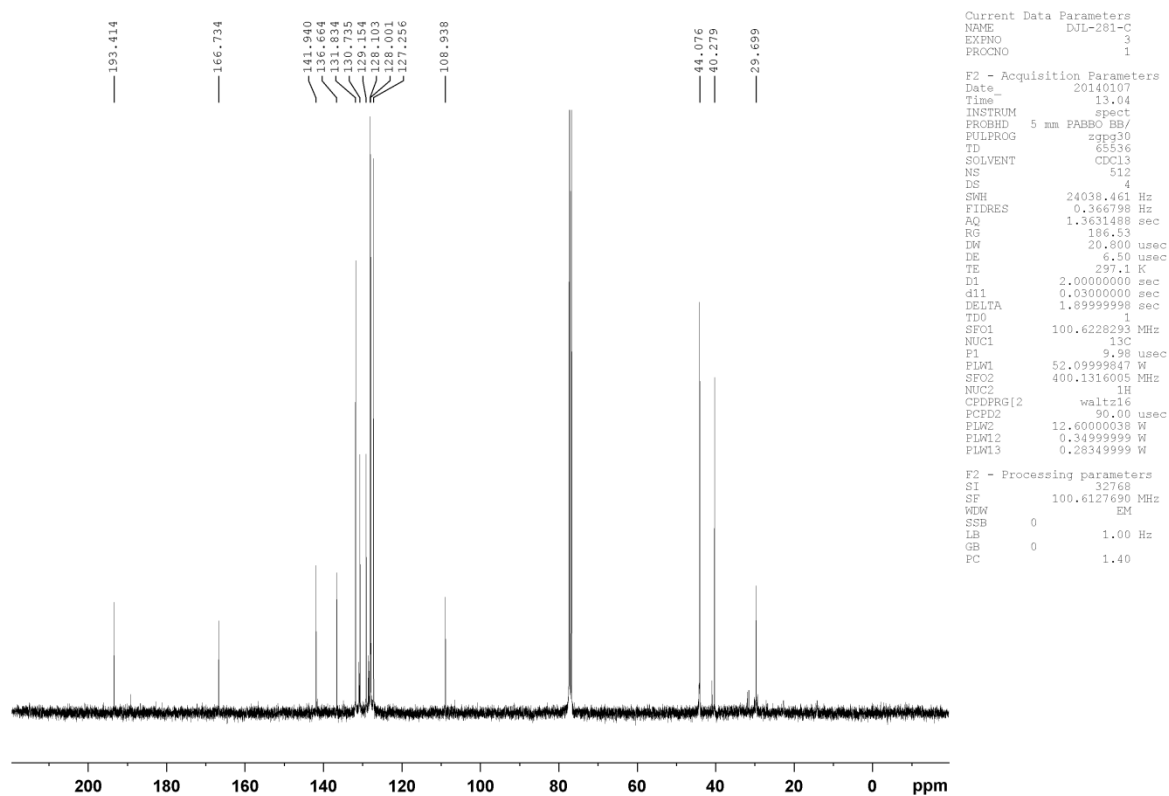



**(Z)-N-(1-(dimethylamino)-3-oxo-1,3-diphenylprop-1-en-2-yl)-4-methylbenzenesulfonamide (3b):**

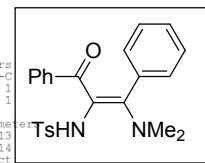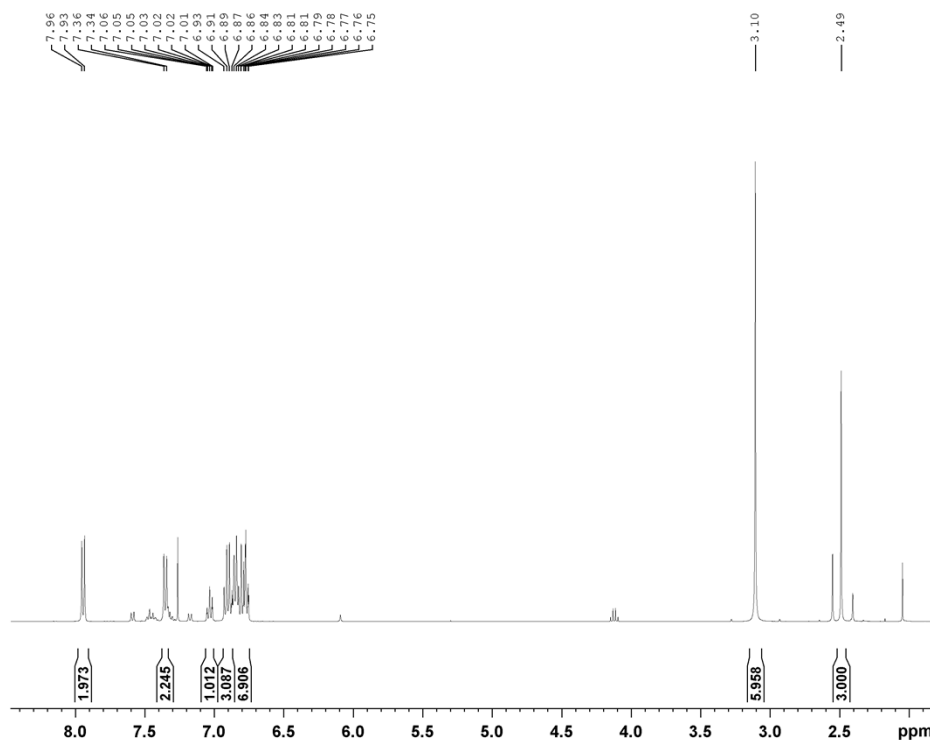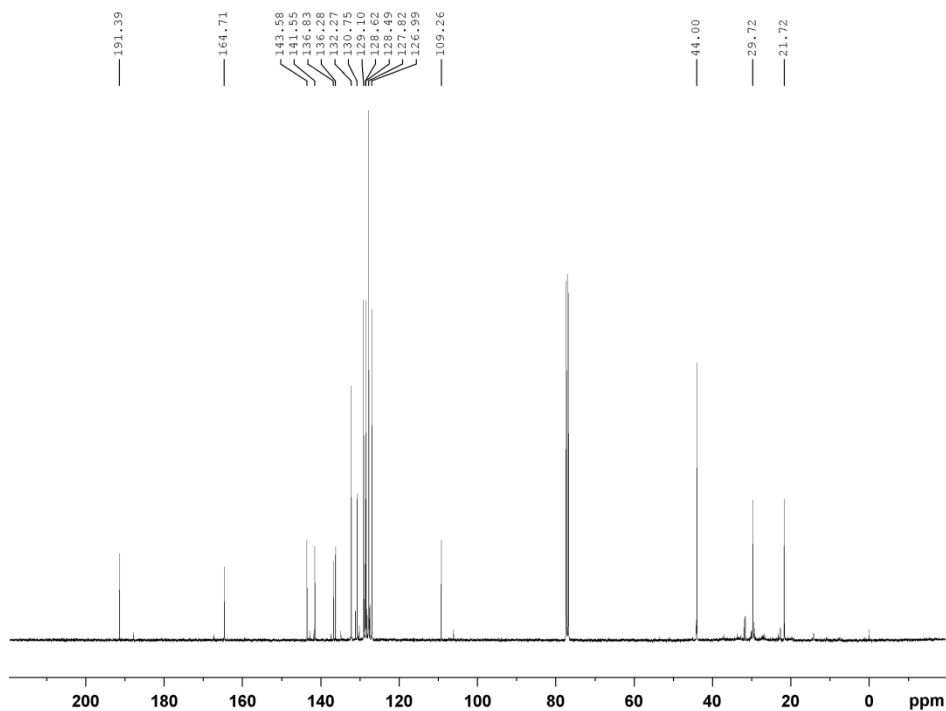

**(Z)-N-(1-(4-(tert-butyl)phenyl)-1-(dimethylamino)-3-oxo-3-phenylprop-1-en-2-yl)-4-methylbenzenesulfonamide (3c):**

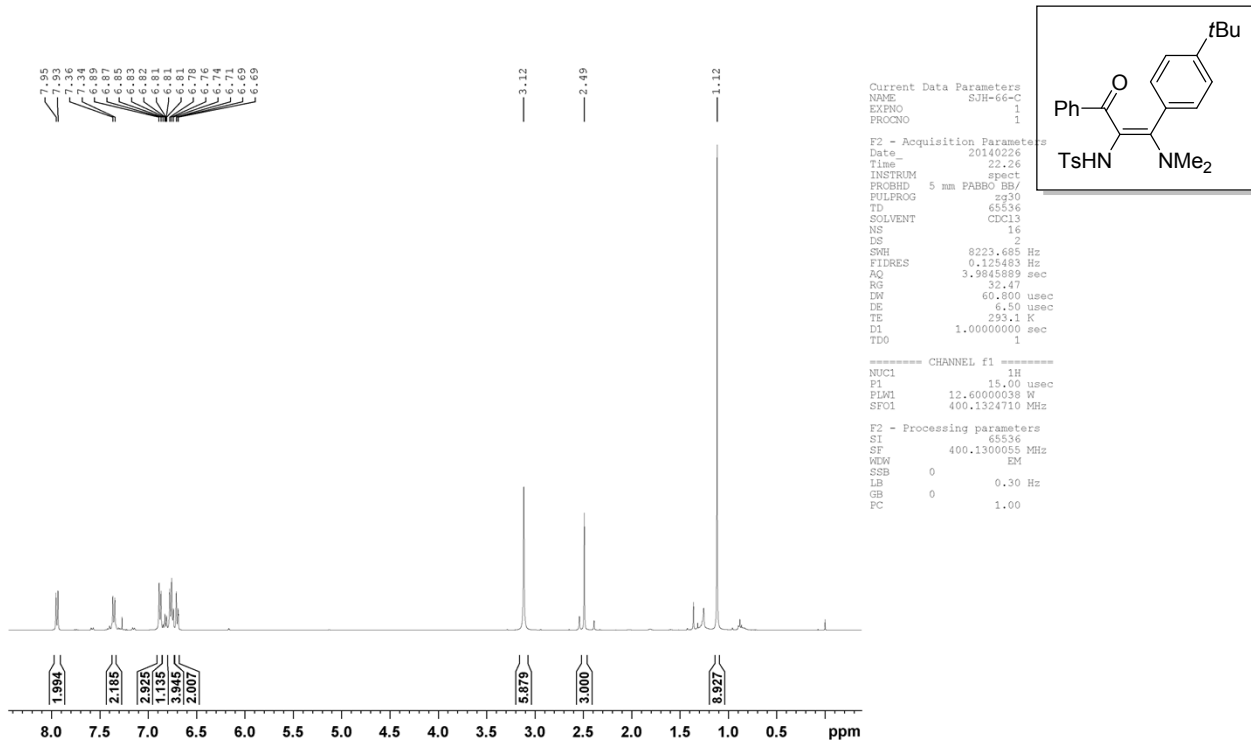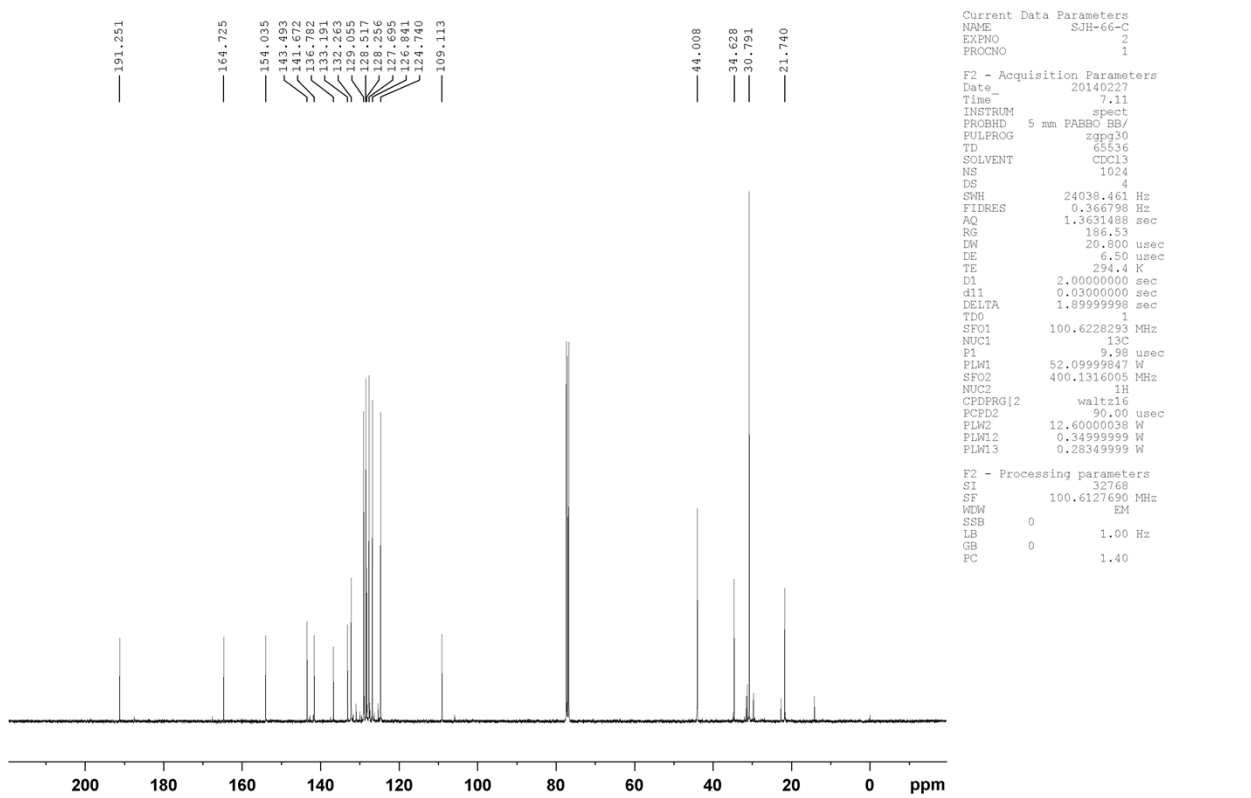

**(Z)-N-(1-(dimethylamino)-3-oxo-3-phenyl-1-(p-tolyl)prop-1-en-2-yl)-4-methylbenzenesulfonamide (3d):**

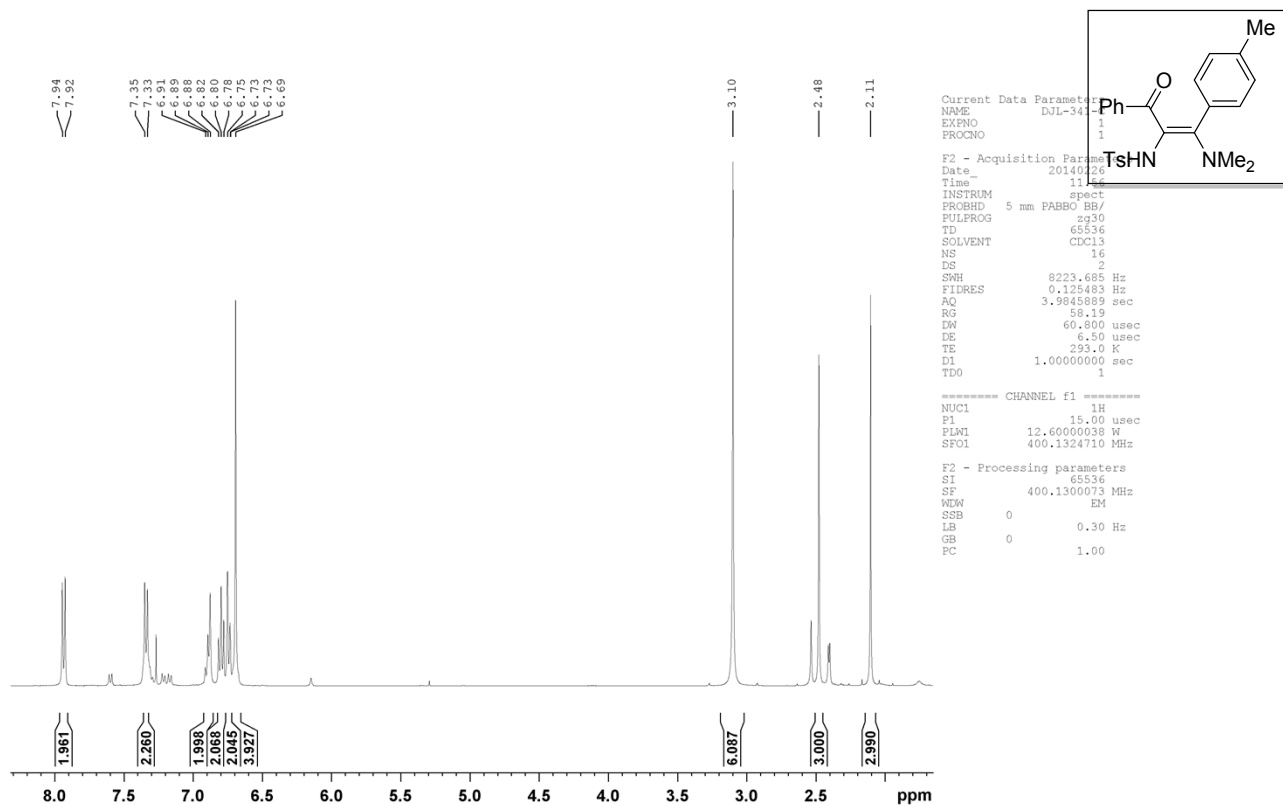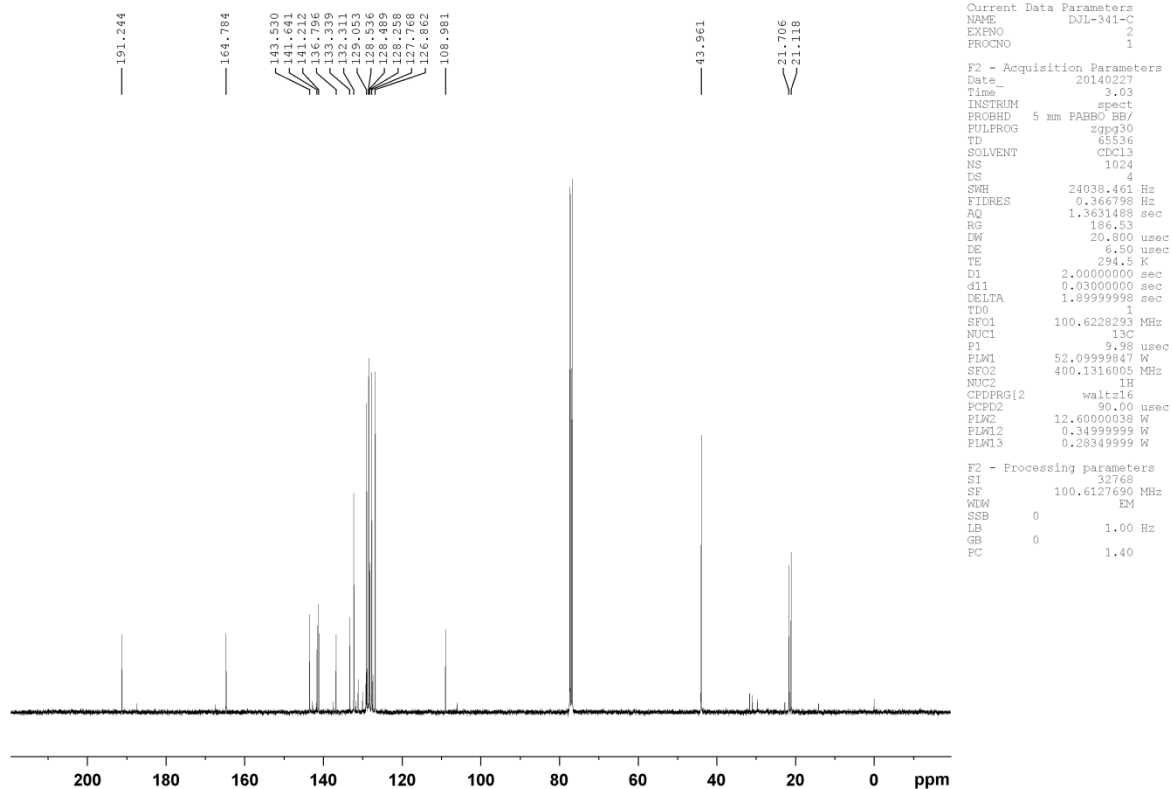

**(Z)-N-(1-(dimethylamino)-1-(4-nitrophenyl)-3-oxo-3-phenylprop-1-en-2-yl)-4-methylbenzenesulfonamide (3e):**

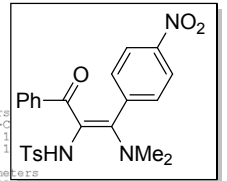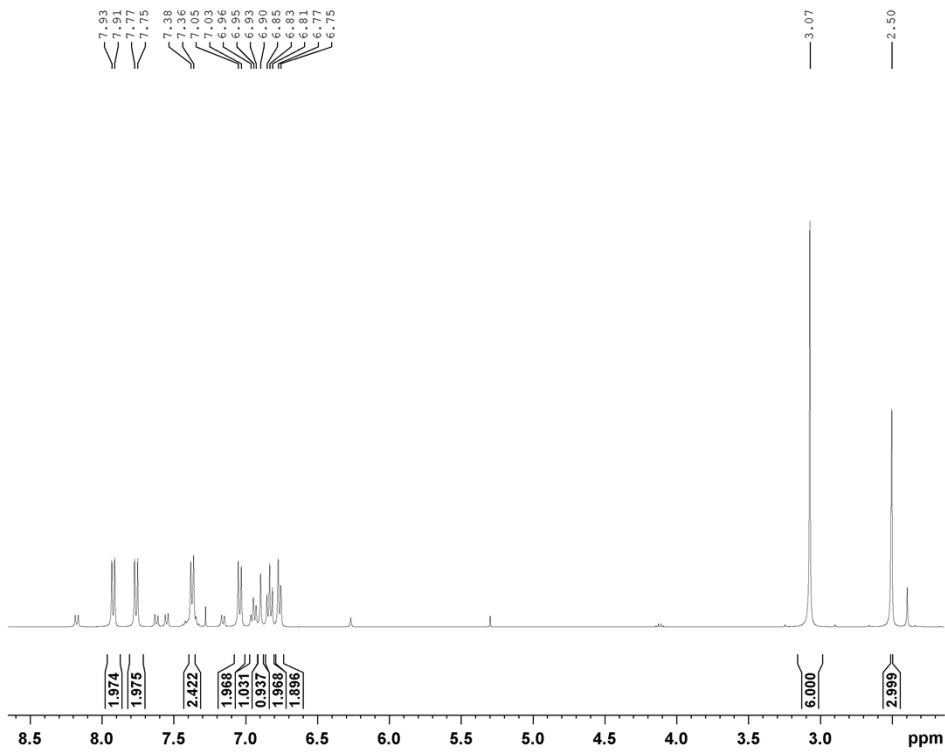

Current Data Parameters  
 Name DJL-333-C  
 ExpNo 1  
 ProcNo 1

F2 - Acquisition Parameters  
 Date\_ 20140226  
 Time\_ 14.16  
 INSTRUM spect  
 PROBHD 5 mm PABBO BB/  
 PULPROG zg30  
 TD 65536  
 SOLVENT CDCl3  
 NS 16  
 DS 2  
 SWH 8223.685 Hz  
 FIDRES 0.125483 Hz  
 AQ 3.9845889 sec  
 RG 32.47  
 DW 60.800 usec  
 DE 6.50 usec  
 TE 293.1 K  
 D1 1.00000000 sec  
 TD0 1

==== CHANNEL f1 =====  
 NUC1 1H  
 P1 15.00 usec  
 PLW1 12.6000038 W  
 SFO1 400.1324710 MHz

F2 - Processing parameters  
 SI 65536  
 SF 400.1300025 MHz  
 WDW EM  
 SSB 0  
 LB 0.30 Hz  
 GB 0  
 PC 1.00

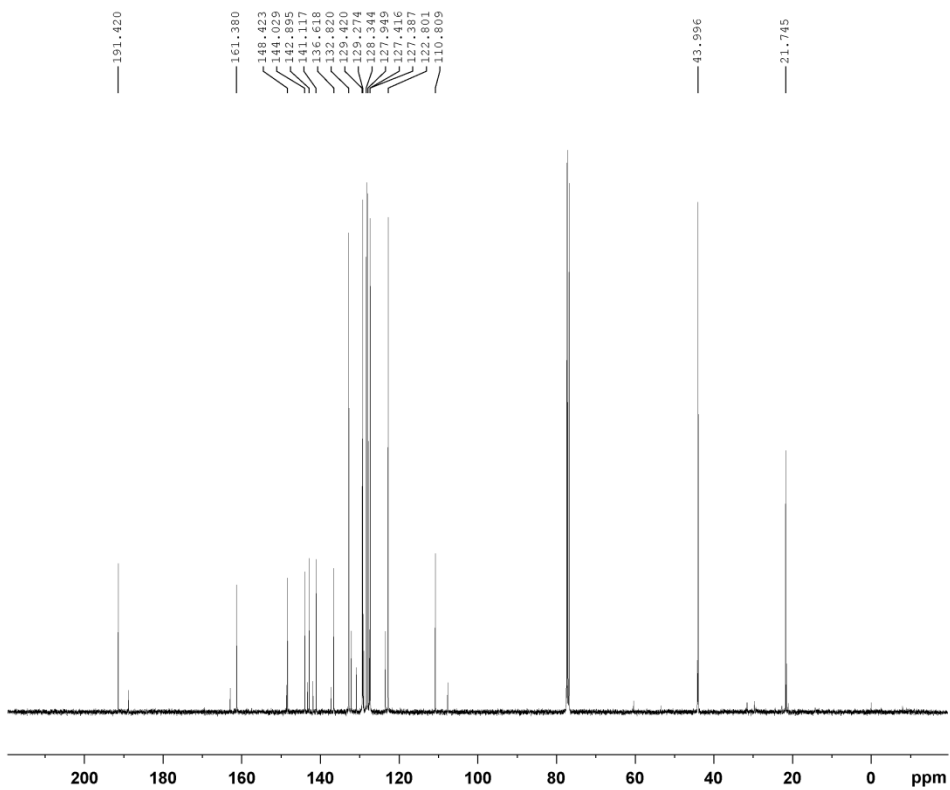

Current Data Parameters  
 Name DJL-333-C  
 ExpNo 2  
 ProcNo 1

F2 - Acquisition Parameters  
 Date\_ 20140226  
 Time\_ 3.01  
 INSTRUM spect  
 PROBHD 5 mm PABBO BB/  
 PULPROG zgpg30  
 TD 65536  
 SOLVENT CDCl3  
 NS 1024  
 DS 4  
 SWH 24038.461 Hz  
 FIDRES 0.366798 Hz  
 AQ 1.3631488 sec  
 RG 186.53  
 DW 20.800 usec  
 DE 6.50 usec  
 TE 294.3 K  
 D1 2.00000000 sec  
 d11 0.03000000 sec  
 DELTA 1.89999998 sec  
 TD0 1  
 SFO1 100.6228293 MHz  
 NUC1 13C  
 P1 9.98 usec  
 PLW1 52.09999847 W  
 SFO2 400.1316005 MHz  
 NUC2 1H  
 CPDPRG2 waltz16  
 PCPD2 90.00 usec  
 PLW2 12.6000038 W  
 PLW12 0.34999999 W  
 PLW13 0.28349999 W

F2 - Processing parameters  
 SI 32768  
 SF 100.6127690 MHz  
 WDW EM  
 SSB 0  
 LB 1.00 Hz  
 GB 0  
 PC 1.40

**(Z)-N-(1-(dimethylamino)-3-oxo-3-phenyl-1-(m-tolyl)prop-1-en-2-yl)-4-methylbenzenesulfonamide (3f):**

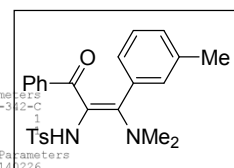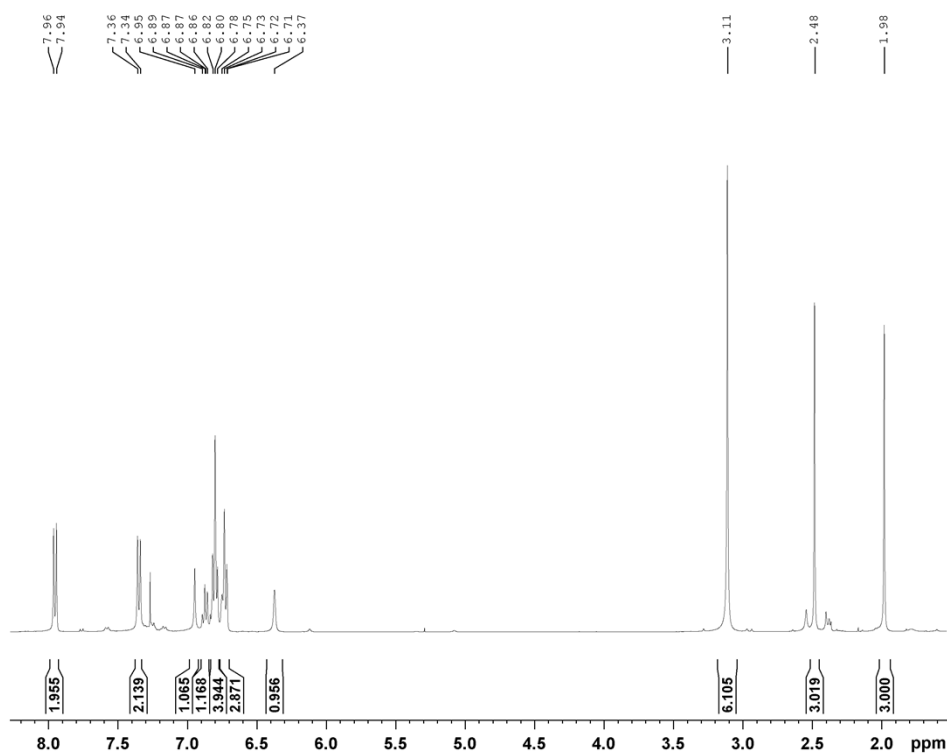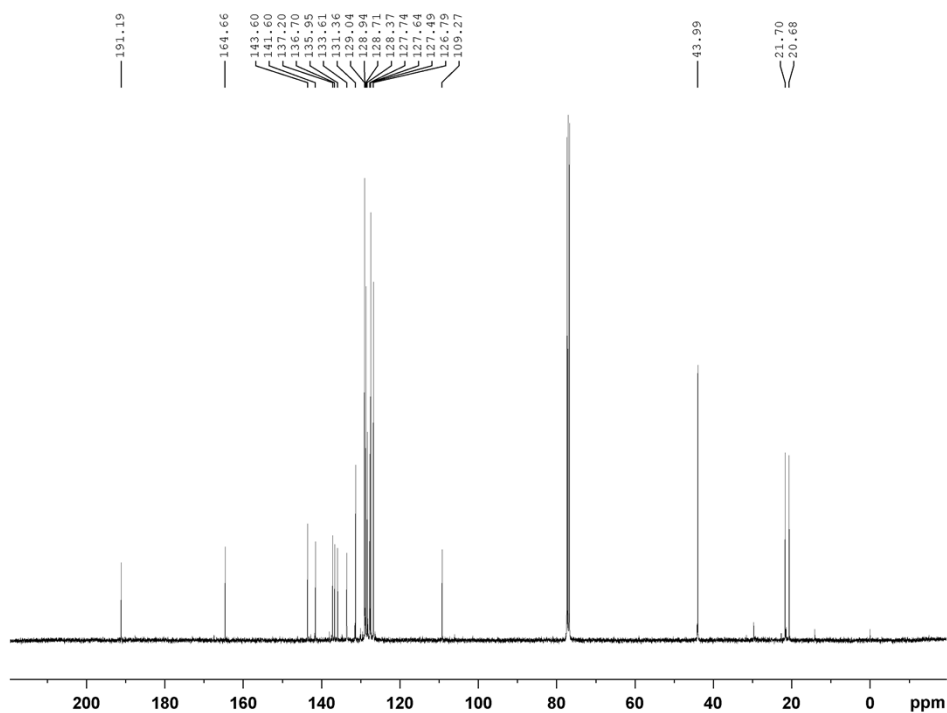

**(Z)-N-(1-(3-chlorophenyl)-1-(dimethylamino)-3-oxo-3-phenylprop-1-en-2-yl)-4-methylbenzenesulfonamide (3g):**

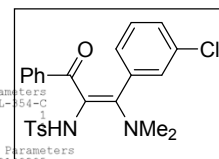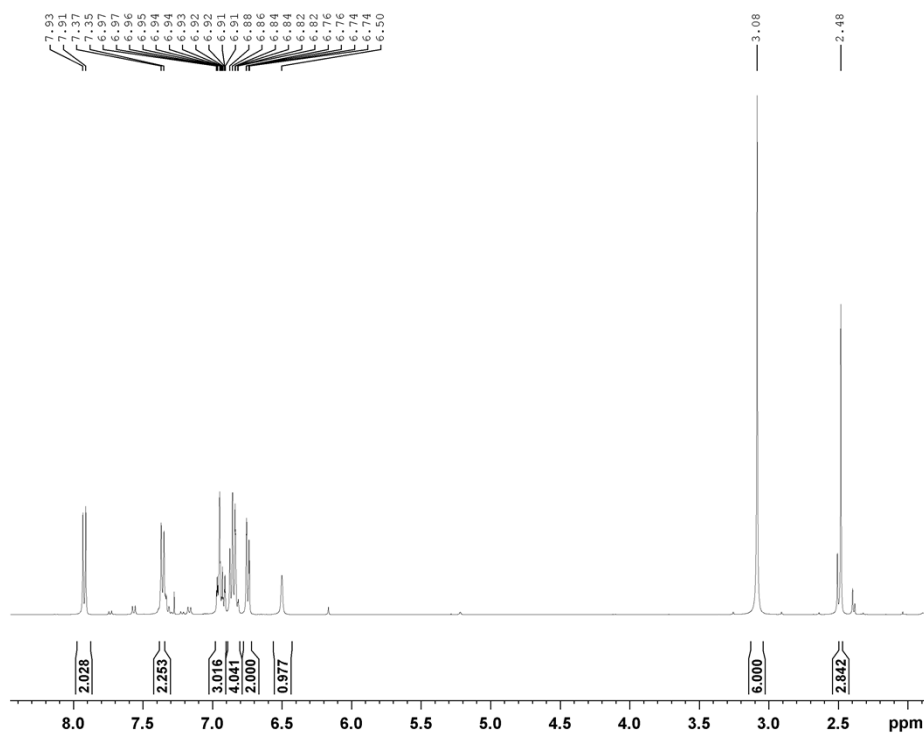

Current Data Parameters  
 NAME DJL-354-C  
 EXPNO 1  
 PROCNO 1

F2 - Acquisition Parameters  
 Date 20140306  
 Time 20.28  
 INSTRUM spect  
 PROBHD 5 mm PABBO BB/  
 PULPROG zg30  
 TD 65536  
 SOLVENT CDCl3  
 NS 16  
 DS 2  
 SWH 8223.685 Hz  
 FIDRES 0.125483 Hz  
 AQ 3.9845889 sec  
 RG 32.47  
 DW 60.800 usec  
 DE 6.50 usec  
 TE 293.1 K  
 D1 1.0000000 sec  
 TDO 1

===== CHANNEL f1 =====  
 NUC1 1H  
 P1 15.00 usec  
 PLW1 12.6000038 W  
 SFO1 400.1324710 MHz

F2 - Processing parameters  
 SI 65536  
 SF 400.1300033 MHz  
 WLW EM  
 SSB 0  
 LB 0.30 Hz  
 GB 0  
 PC 1.00

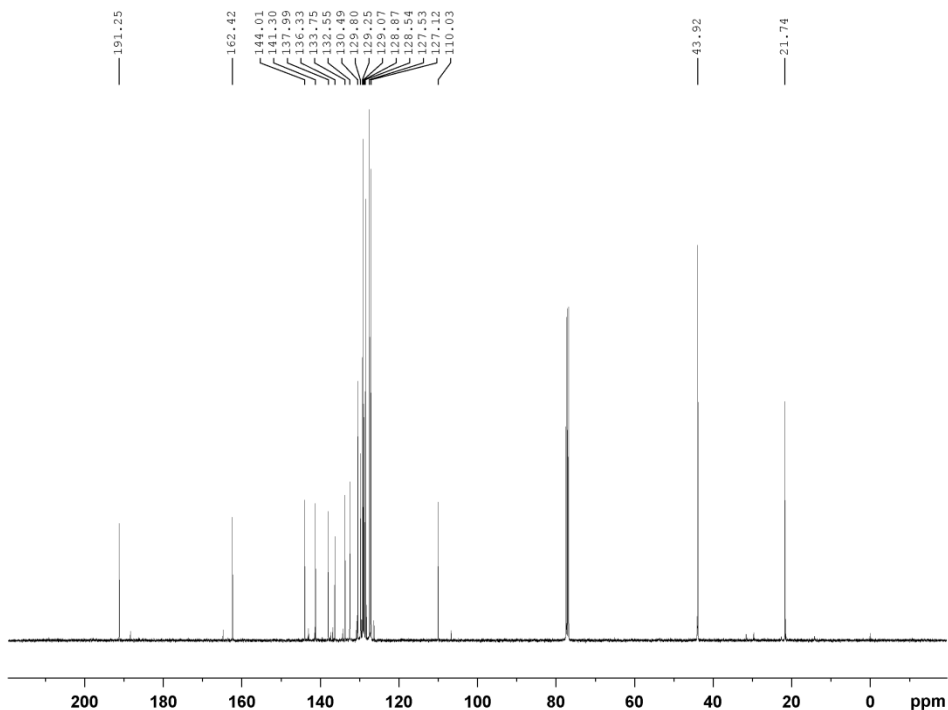

Current Data Parameters  
 NAME DJL-354-C  
 EXPNO 2  
 PROCNO 1

F2 - Acquisition Parameters  
 Date 20140306  
 Time 4.03  
 INSTRUM spect  
 PROBHD 5 mm PABBO BB/  
 PULPROG zgpg30  
 TD 65536  
 SOLVENT CDCl3  
 NS 1024  
 DS 4  
 SWH 24038.461 Hz  
 FIDRES 0.366798 Hz  
 AQ 1.3631488 sec  
 RG 186.53  
 DW 20.800 usec  
 DE 6.50 usec  
 TE 294.8 K  
 D1 2.0000000 sec  
 d11 0.0300000 sec  
 DELTA 1.8999999 sec  
 TDO 1  
 SFO1 100.6228293 MHz  
 NUC1 13C  
 P1 9.98 usec  
 PLW1 52.09999847 W  
 SFO2 400.1316005 MHz  
 NUC2 1H  
 CHPRG[2] waltz16  
 ECPD2 20.00 usec  
 PLW2 12.6000038 W  
 PLW12 0.34999999 W  
 PLW13 0.28349999 W

F2 - Processing parameters  
 SI 32768  
 SF 100.6127690 MHz  
 WLW EM  
 SSB 0  
 LB 1.00 Hz  
 GB 0  
 PC 1.40

**(Z)-N-(1-(3-bromophenyl)-1-(dimethylamino)-3-oxo-3-phenylprop-1-en-2-yl)-4-methylbenzenesulfonamide (3h):**

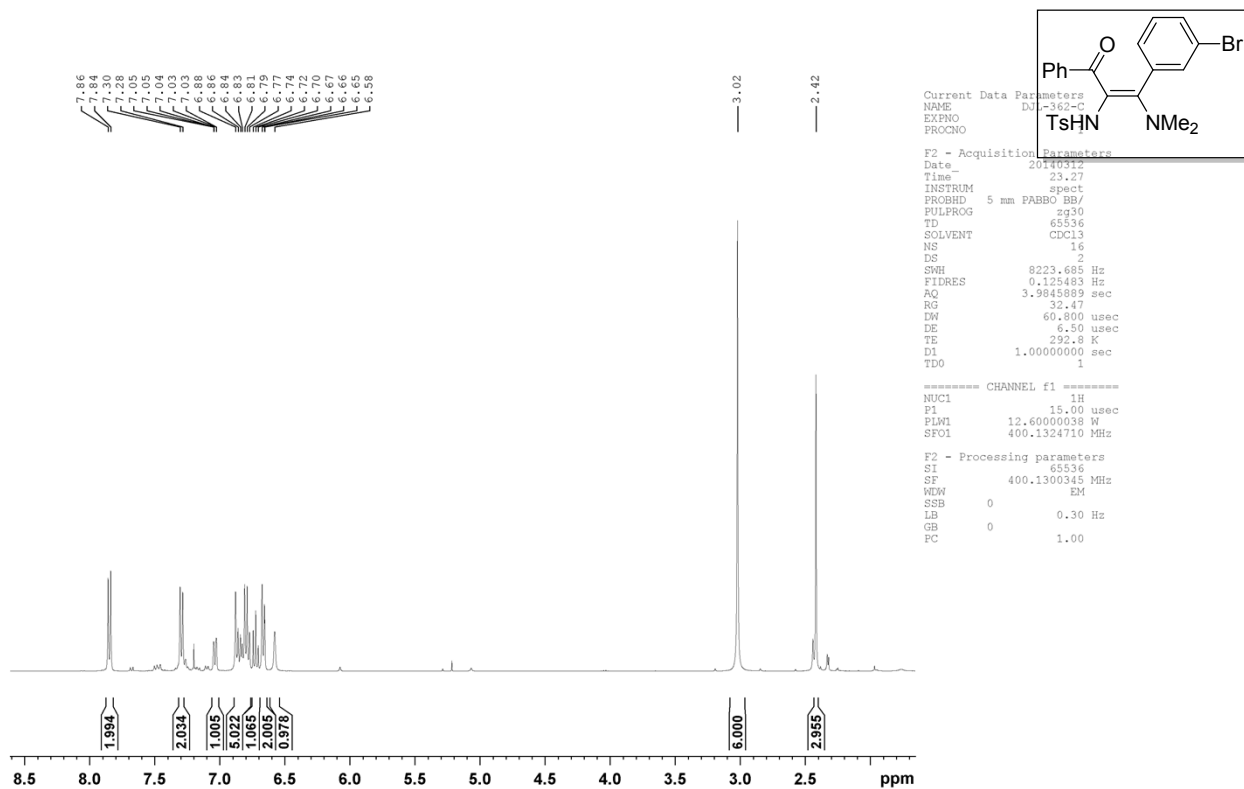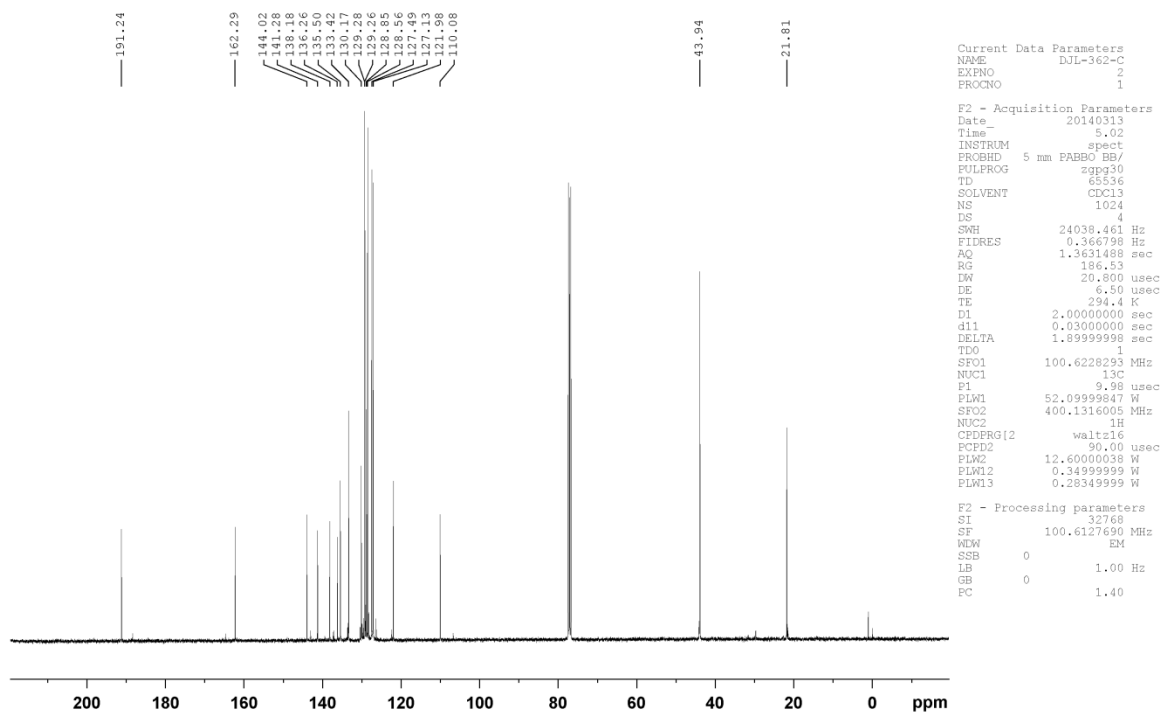

**(Z)-N-(1-(dimethylamino)-1-(naphthalen-2-yl)-3-oxo-3-phenylprop-1-en-2-yl)-4-methylbenzenesulfonamide (3i):**

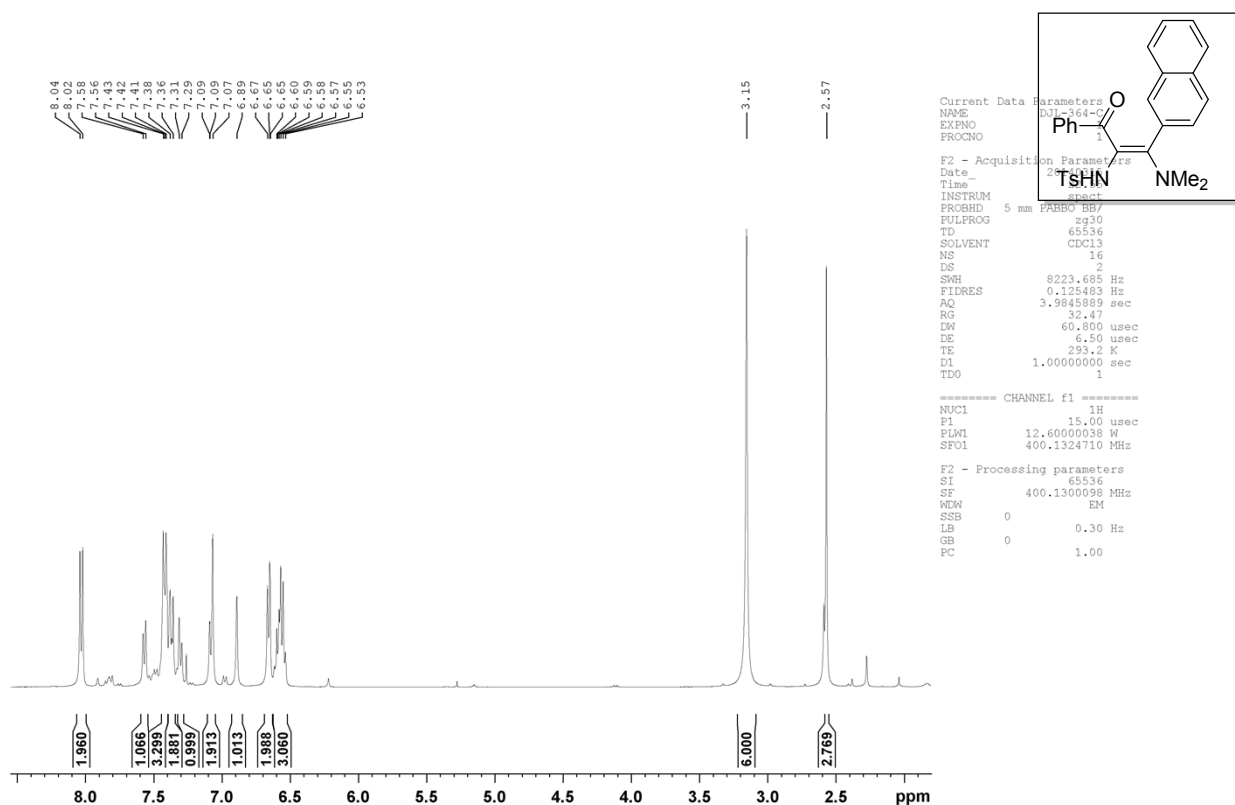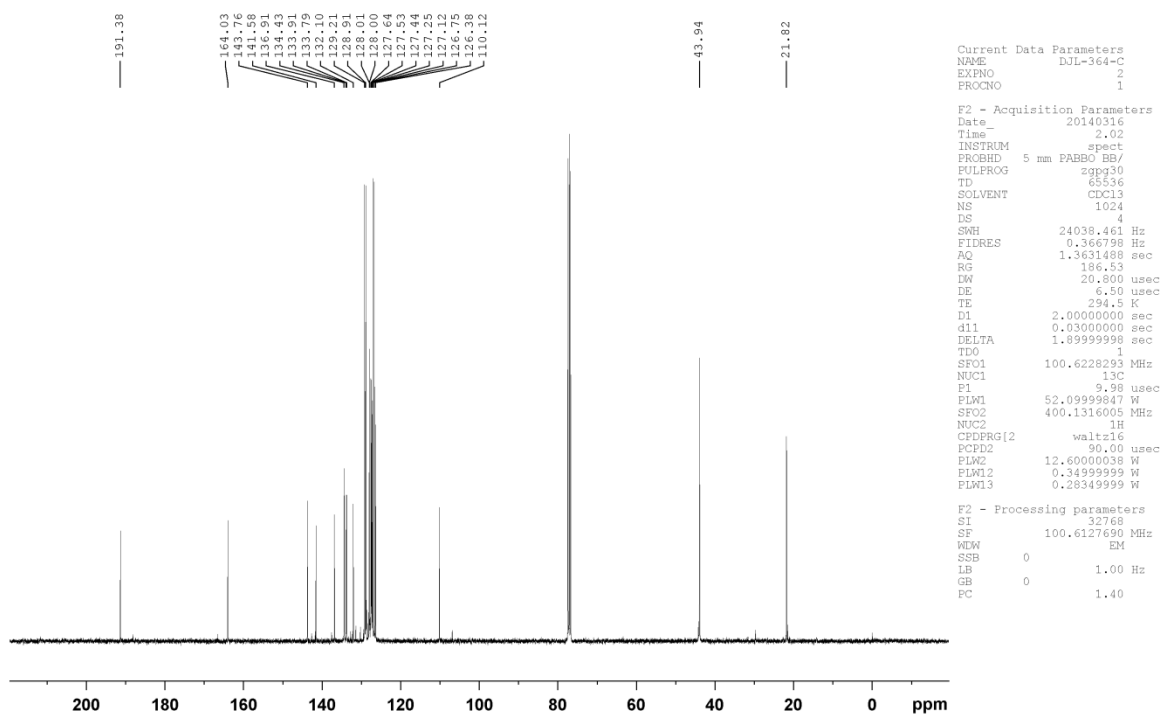



**(Z)-N-(1-(4-bromophenyl)-1-(dimethylamino)-3-oxo-3-phenylprop-1-en-2-yl)-4-methylbenzenesulfonamide (3j):**

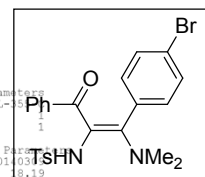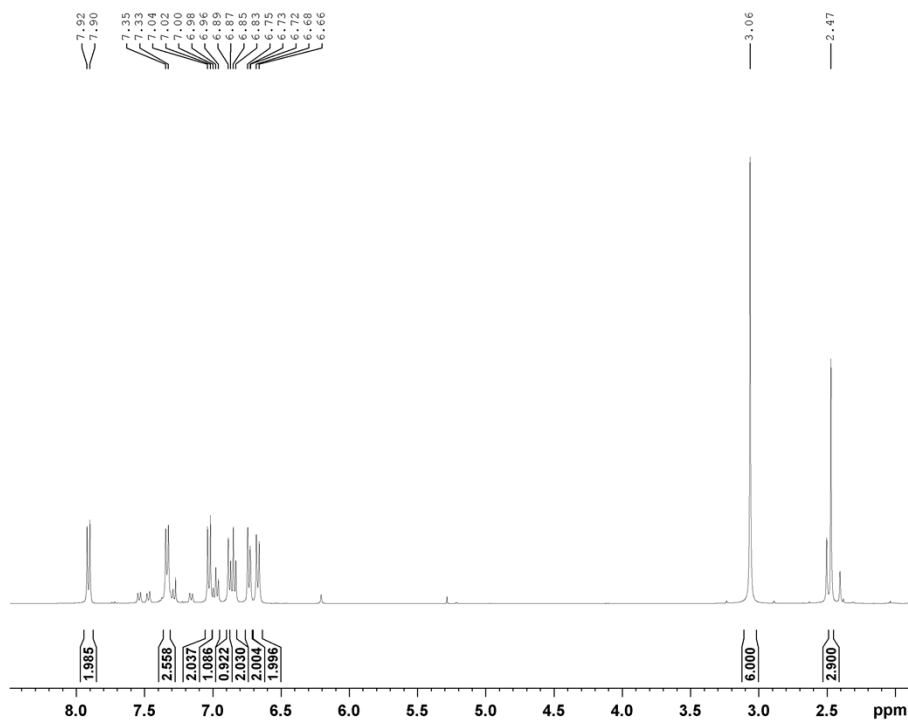

```

Current Data Parameters
NAME      DJL-355-C
EXPNO    1
PROCNO   1

F2 - Acquisition Parameters
Date_    20140310
Time     18:19
INSTRUM spect
PROBHD   5 mm PABBO BB/
PULPROG zgpg30
TD       65536
SOLVENT CDCl3
NS       16
DS       2
SWH      8223.685 Hz
FIDRES   0.125483 Hz
AQ       3.9845889 sec
RG       32.47
IW       60.800 usec
DE       6.50 usec
TE       293.2 K
D1       1.0000000 sec
TD0      1

===== CHANNEL f1 =====
NUC1     1H
P1       15.00 usec
PLW1    12.6000038 W
SF01    400.1324710 MHz

F2 - Processing parameters
SI       65536
SF       400.1300042 MHz
WDW      EM
SSB      0
LB       0.30 Hz
GB       0
PC       1.00
    
```

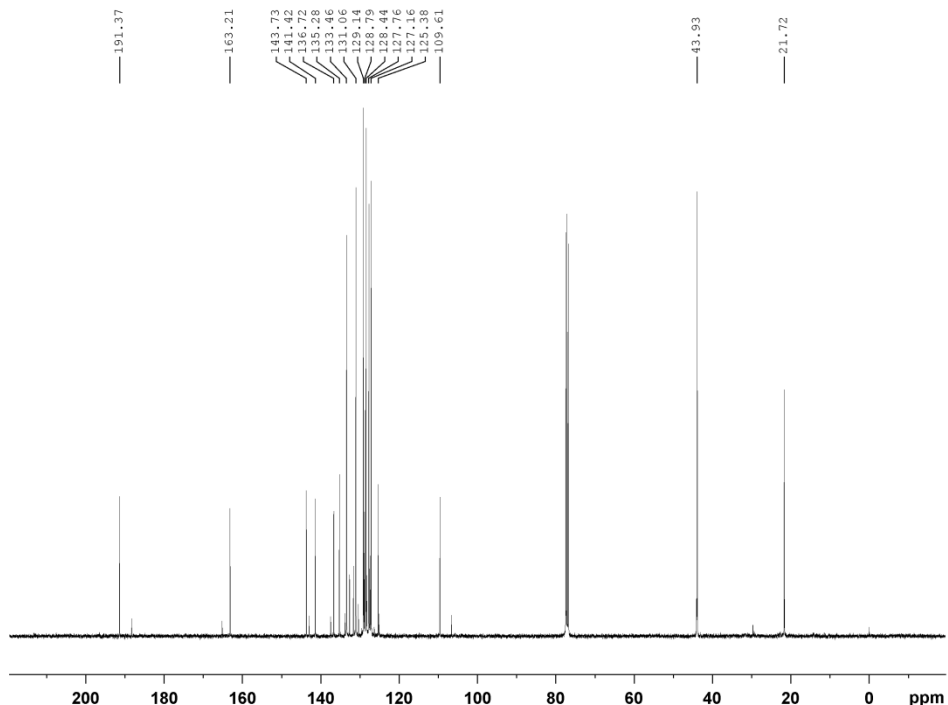

```

Current Data Parameters
NAME      DJL-355-C
EXPNO    2
PROCNO   1

F2 - Acquisition Parameters
Date_    20140310
Time     3:03
INSTRUM spect
PROBHD   5 mm PABBO BB/
PULPROG zgpg30
TD       65536
SOLVENT CDCl3
NS       1024
DS       4
SWH      24039.461 Hz
FIDRES   0.366798 Hz
AQ       1.3631488 sec
RG       186.53
IW       20.800 usec
DE       6.50 usec
TE       294.7 K
D1       2.0000000 sec
d11      0.0300000 sec
DELTA    1.8999999 sec
TD0      1
SF01    100.6228293 MHz
NUC1     13C
P1       9.98 usec
PLW1    52.09999847 W
SF02    400.1316005 MHz
NUC2     1H
CPDPRG2 waltz16
PCPD2    90.00 usec
PLW2    12.6000038 W
PLW12   0.34999999 W
PLW13   0.28349999 W

F2 - Processing parameters
SI       32768
SF       100.6127690 MHz
WDW      EM
SSB      0
LB       1.00 Hz
GB       0
PC       1.40
    
```

**(Z)-N-(1-(4-chlorophenyl)-1-(dimethylamino)-3-oxo-3-phenylprop-1-en-2-yl)-4-methylbenzenesulfonamide (3k):**

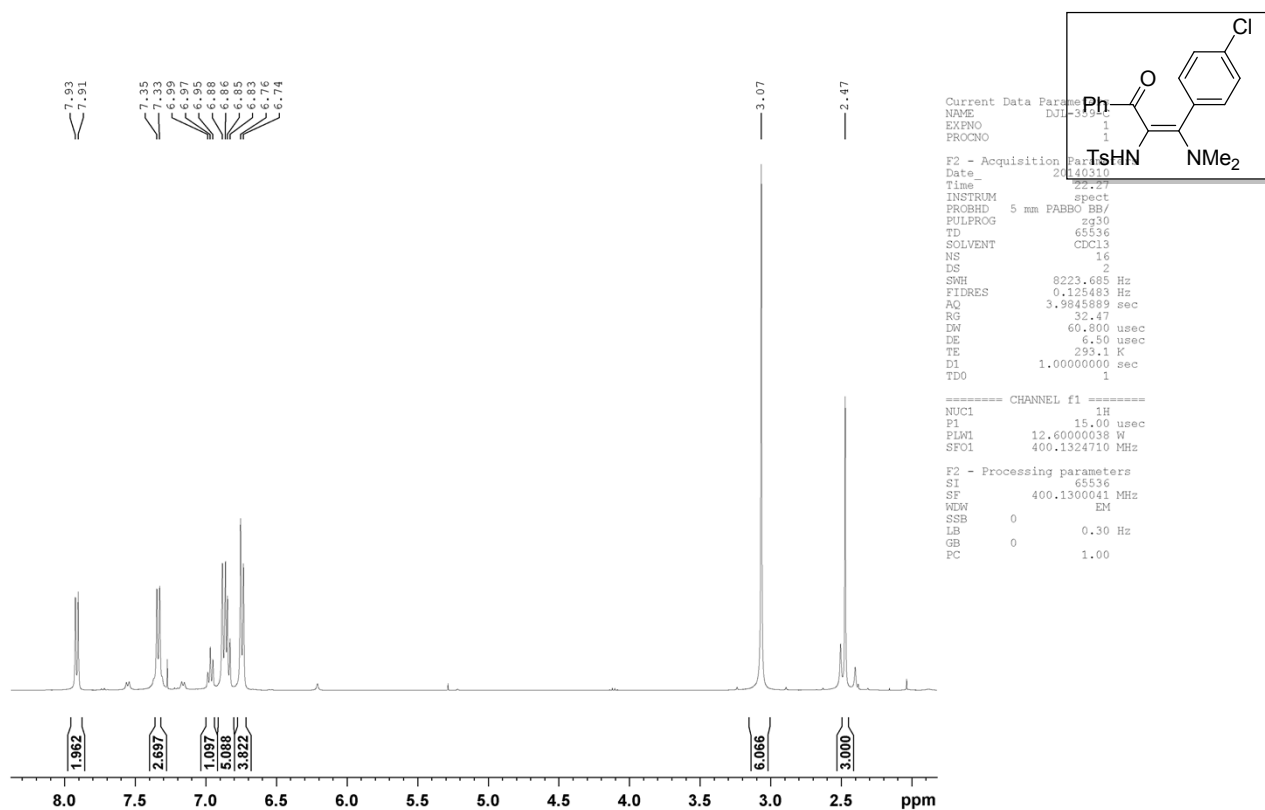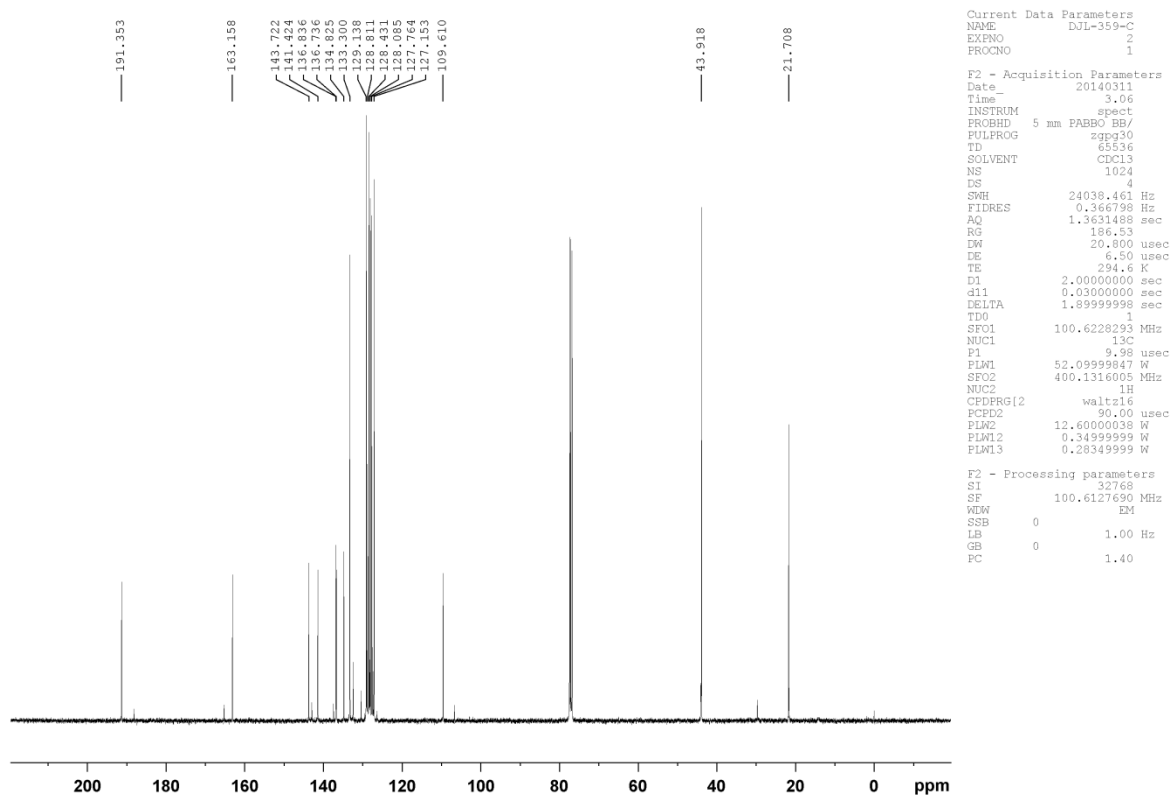

**(Z)-N-(1-(dimethylamino)-1-(4-fluorophenyl)-3-oxo-3-phenylprop-1-en-2-yl)-4-methylbenzenesulfonamide (3I):**

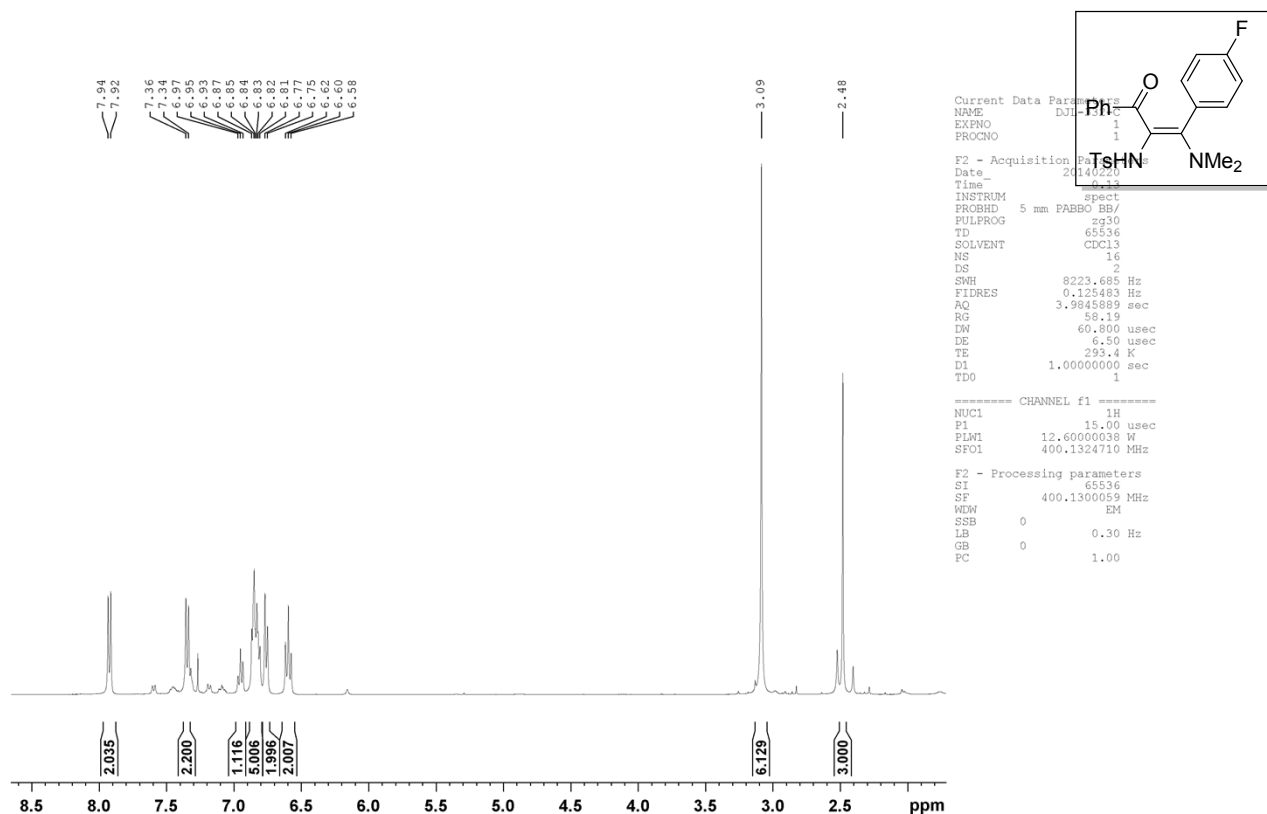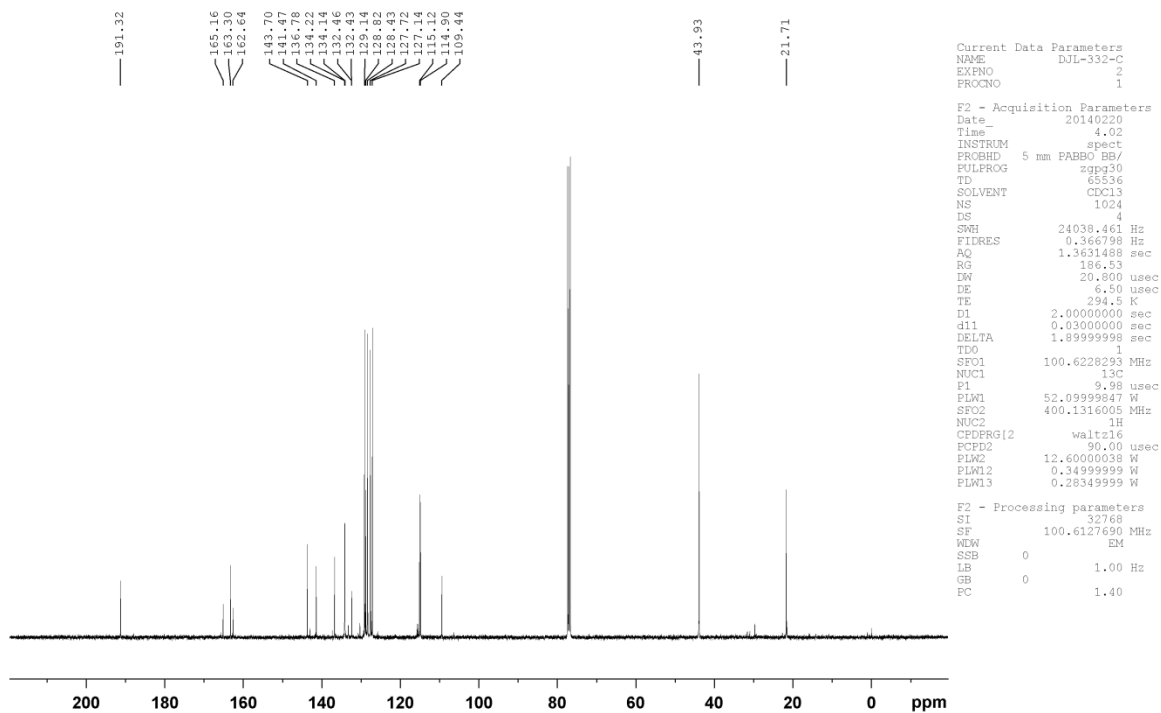

**(Z)-4-methyl-N-(1-(methyl(phenyl)amino)-3-oxo-1,3-diphenylprop-1-en-2-yl)benzenesulfonamide (3m):**

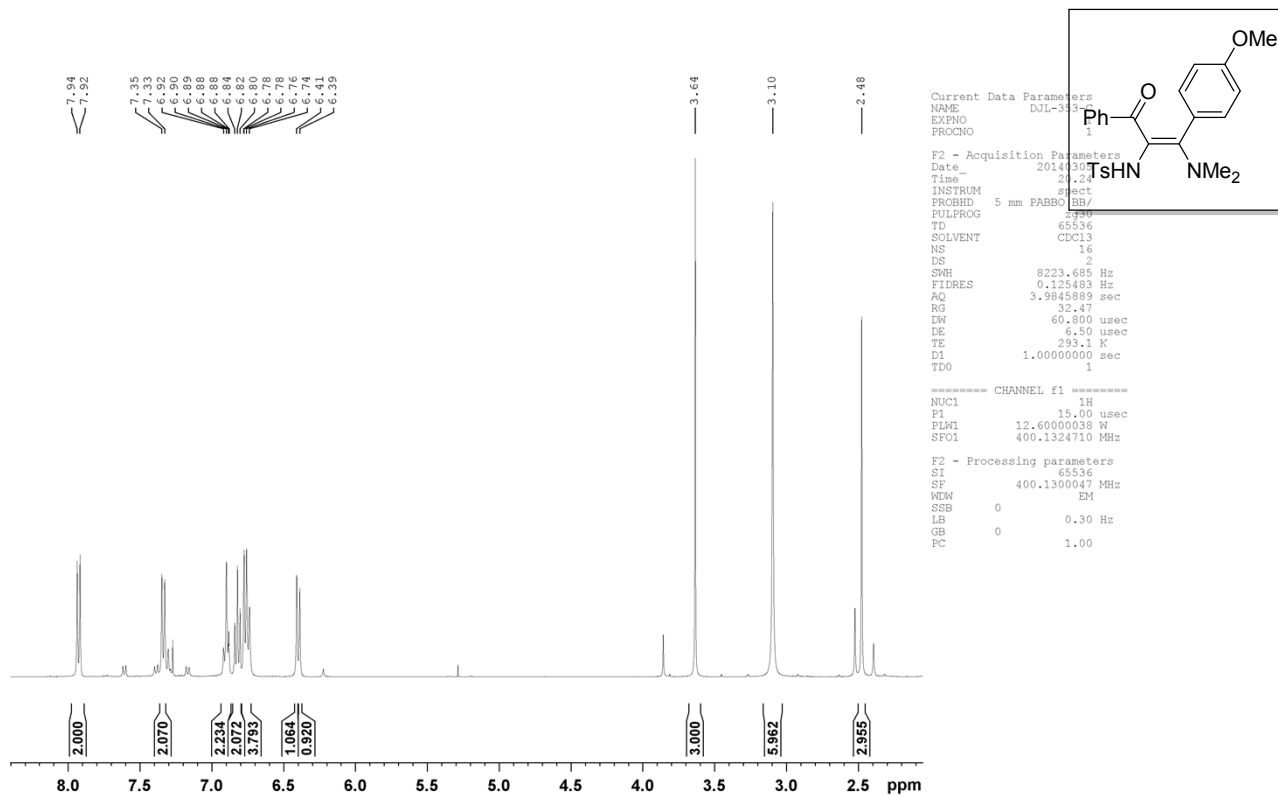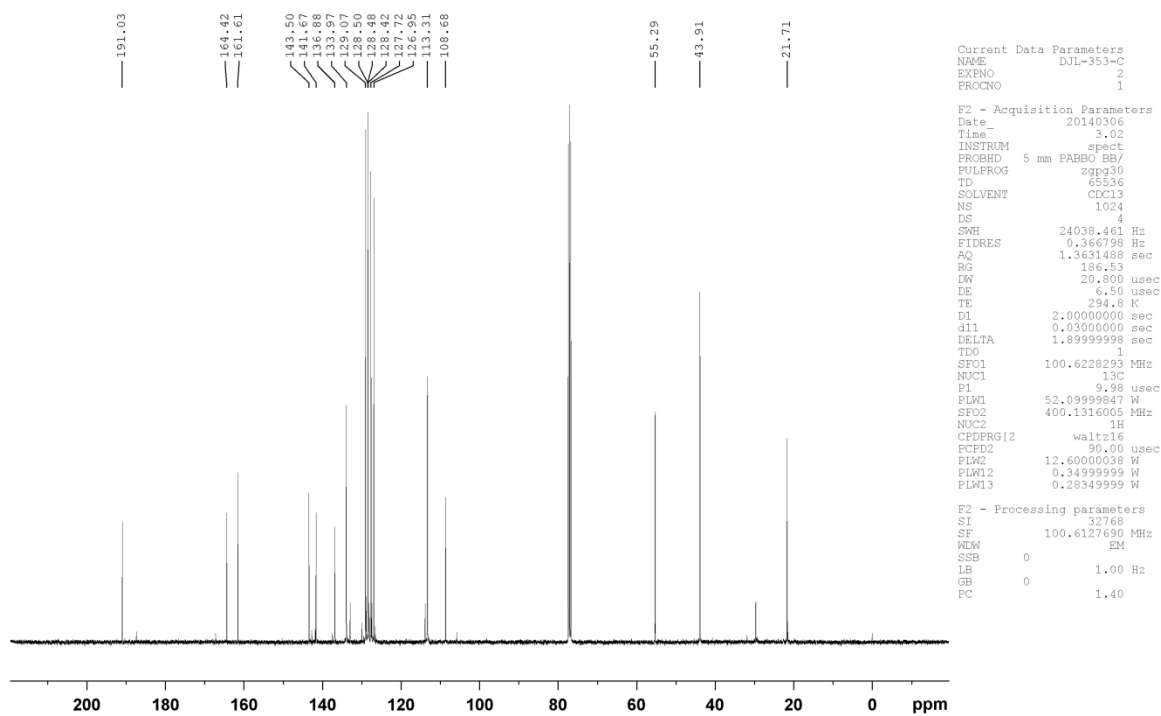

**(Z)-N-(1-(benzyl(methyl)amino)-3-oxo-1,3-diphenylprop-1-en-2-yl)-4-methylbenzenesulfonamide (3n):**

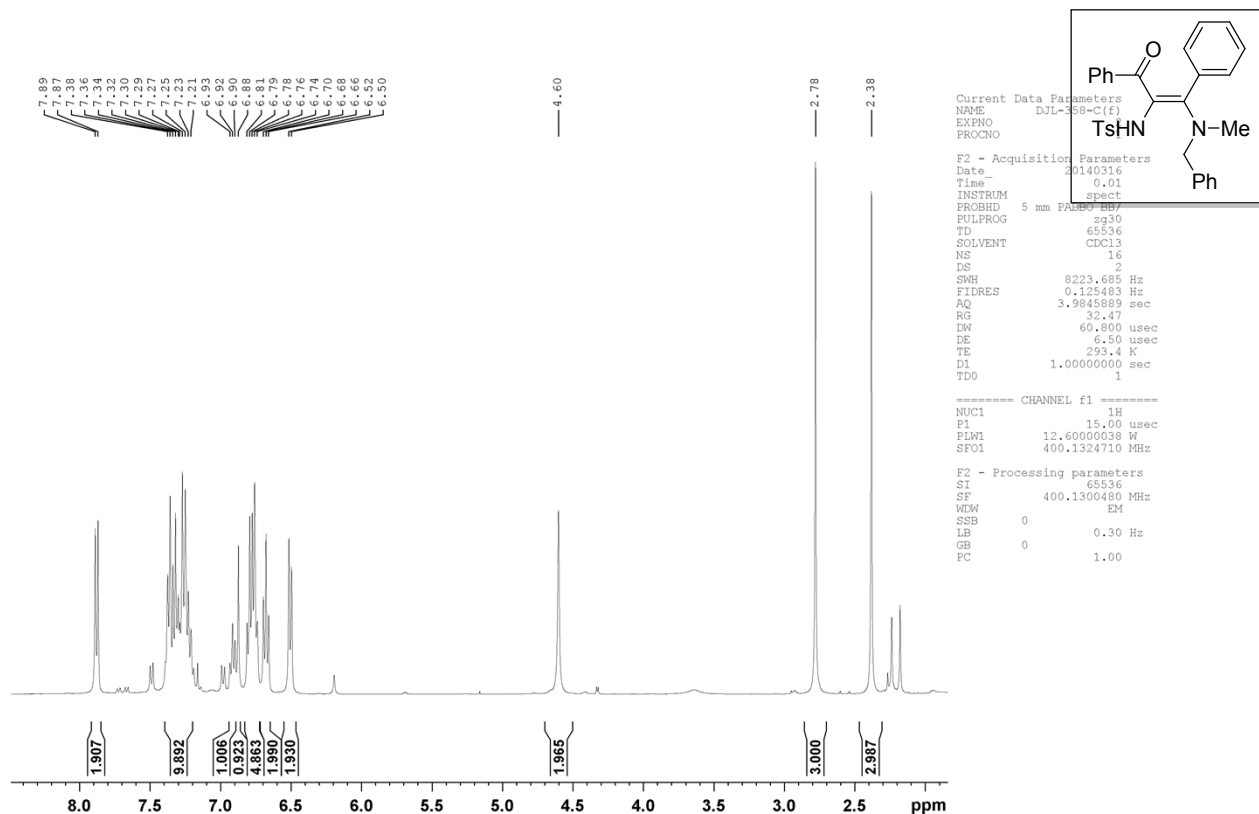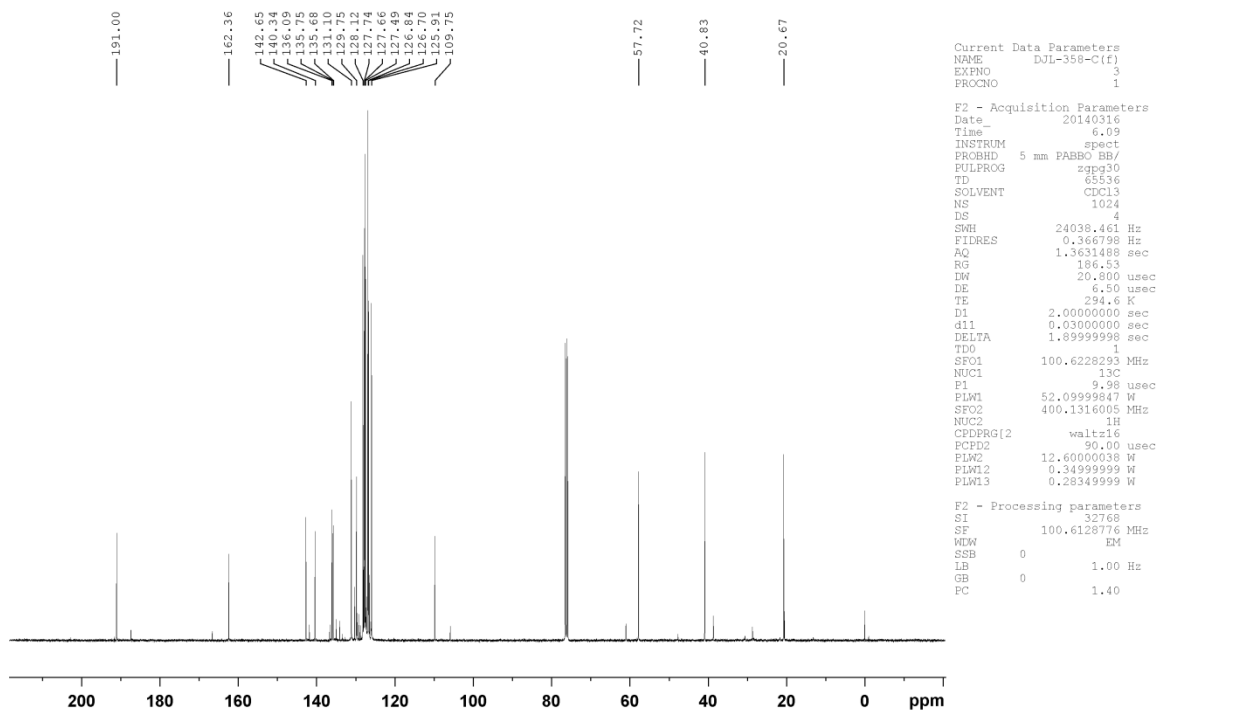

**(Z)-4-methyl-N-(1-morpholino-3-oxo-1,3-diphenylprop-1-en-2-yl)benzenesulfonamide (3o):**

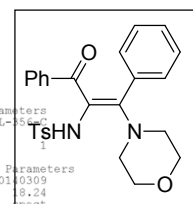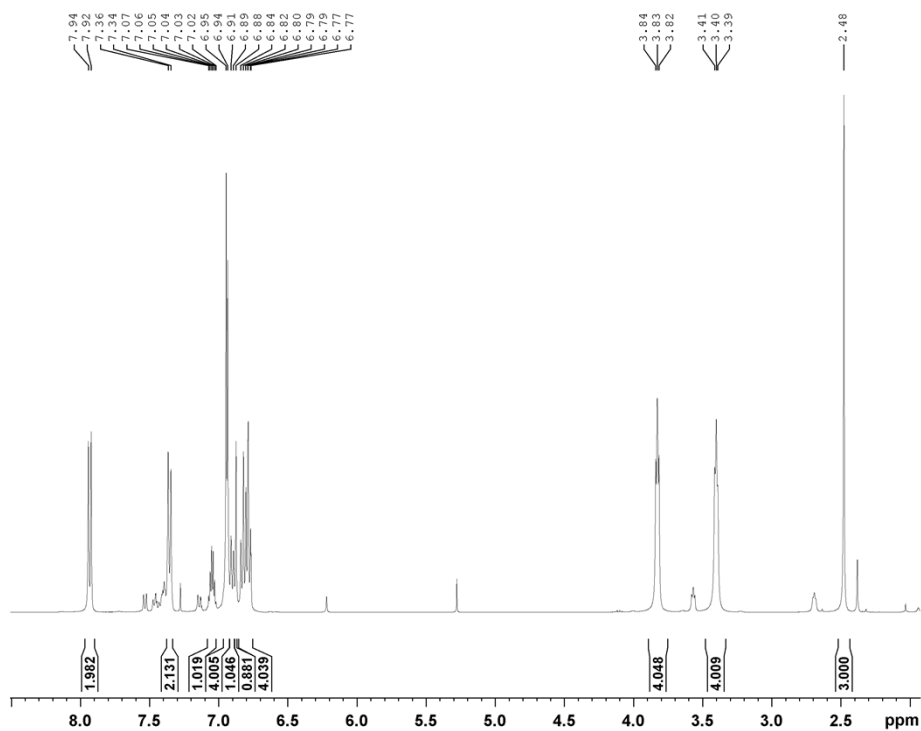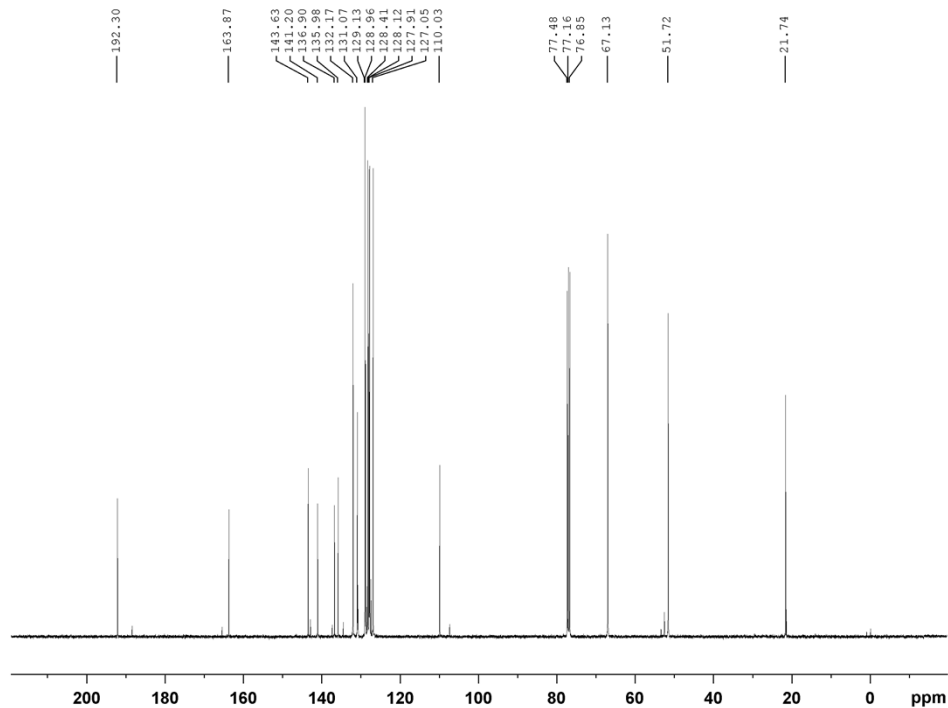

**(Z)-4-methyl-N-(3-oxo-1,3-diphenyl-1-(piperidin-1-yl)prop-1-en-2-yl)benzenesulfonamide (3p):**

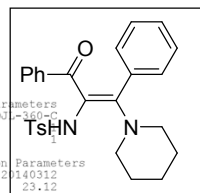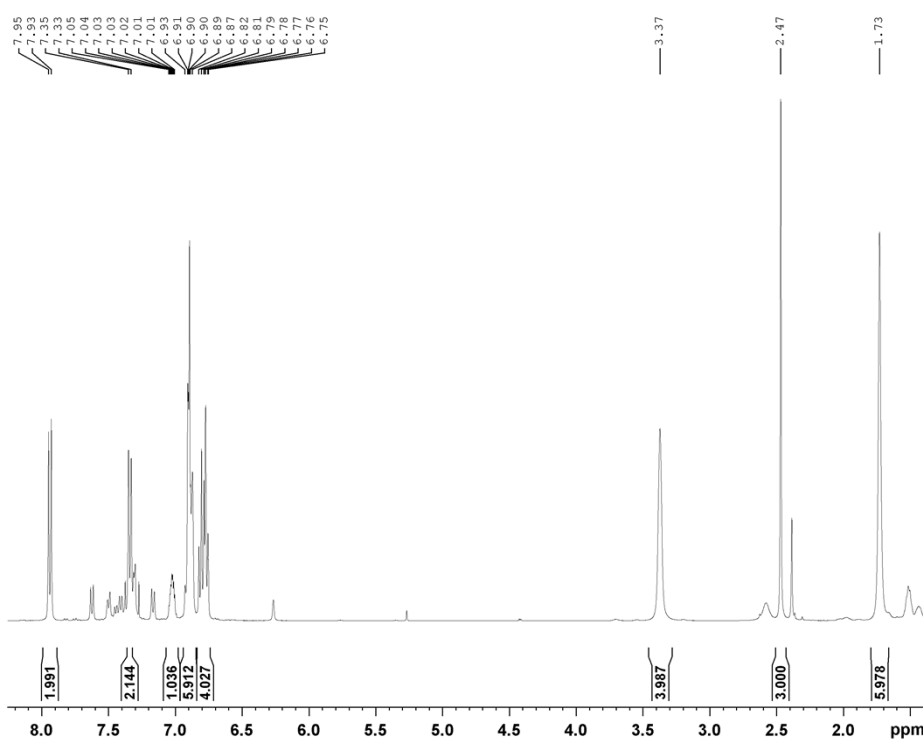

Current Data Parameters  
 NAME DJL-160-  
 EXFNO  
 PROCNO

F2 - Acquisition Parameters  
 Date\_ 20140312  
 Time\_ 23.12  
 INSTRUM spect  
 PROBHD 5 mm PABBO BB/  
 PULPROG zgpg30  
 TD 65536  
 SOLVENT CDCl3  
 NS 2  
 DS 16  
 SWH 8223.685 Hz  
 FIDRES 0.125483 Hz  
 AQ 3.984389 sec  
 RG 32.47  
 LW 60.800 usec  
 DE 6.50 usec  
 TE 292.7 K  
 D1 1.00000000 sec  
 TDO 1

===== CHANNEL f1 =====  
 NUC1 1H  
 P1 15.00 usec  
 PLW1 12.60000038 W  
 SFO1 400.1324710 MHz

F2 - Processing parameters  
 SI 65536  
 SF 400.1300042 MHz  
 WDW EM  
 SSB 0  
 LB 0.30 Hz  
 GB 0  
 PC 1.00

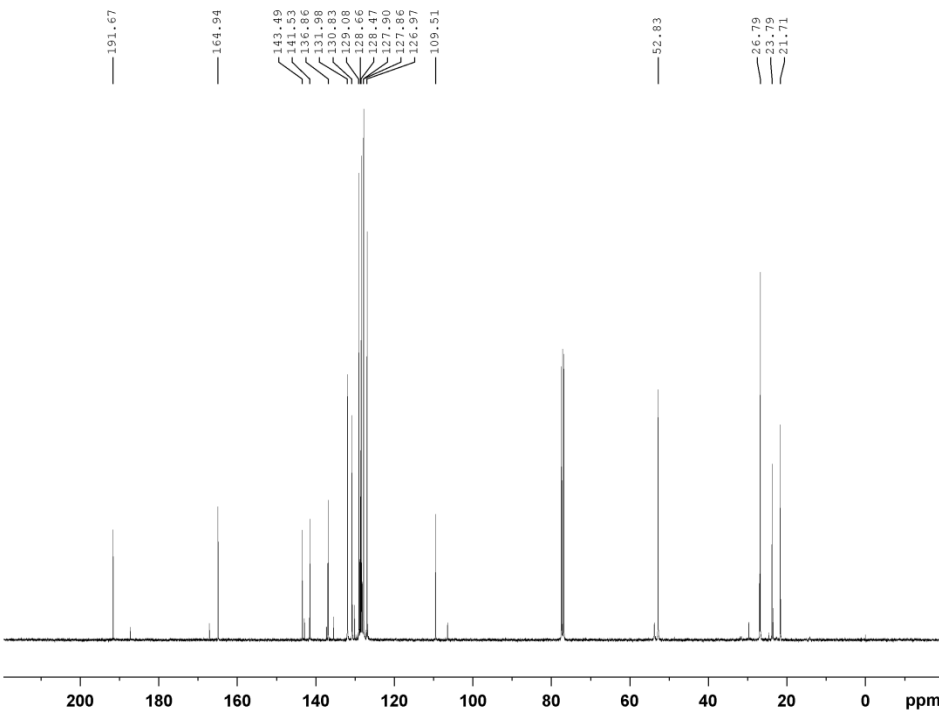

Current Data Parameters  
 NAME DJL-360-C  
 EXFNO 2  
 PROCNO 1

F2 - Acquisition Parameters  
 Date\_ 20140313  
 Time\_ 2.03  
 INSTRUM spect  
 PROBHD 5 mm PABBO BB/  
 PULPROG zgpg30  
 TD 65536  
 SOLVENT CDCl3  
 NS 1024  
 DS 4  
 SWH 24038.461 Hz  
 FIDRES 0.366798 Hz  
 AQ 1.3631488 sec  
 RG 186.53  
 LW 20.800 usec  
 DE 6.50 usec  
 TE 294.2 K  
 D1 2.00000000 sec  
 d11 0.03000000 sec  
 DELTA 1.89999999 sec  
 TDO 1  
 SFO1 100.6228293 MHz  
 NUC1 13C  
 P1 9.98 usec  
 PLW1 52.09999847 W  
 SFO2 400.1316005 MHz  
 NUC2 1H  
 CPDPRG2 waltz16  
 PCPD2 90.00 usec  
 PLW2 12.60000038 W  
 PLW12 0.34999999 W  
 PLW13 0.28349999 W

F2 - Processing parameters  
 SI 32768  
 SF 100.6127690 MHz  
 WDW EM  
 SSB 0  
 LB 1.00 Hz  
 GB 0  
 PC 1.40

**(Z)-N-(1-(diethylamino)-3-oxo-1,3-diphenylprop-1-en-2-yl)-4-methylbenzenesulfonamide (3q):**

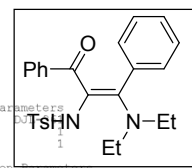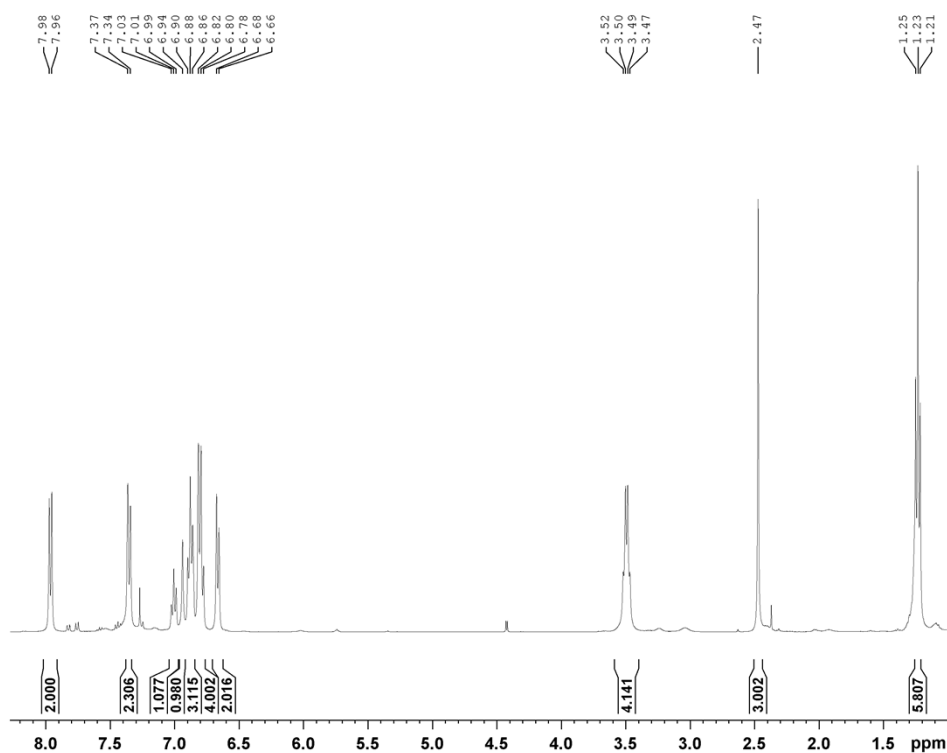

Current Data Parameters  
 Name: 3q  
 ExpNo: 1  
 ProcNo: 1

F2 - Acquisition Parameters  
 Date\_: 20140312  
 Time: 23.22  
 INSTRUM: spect  
 PROBHD: 5 mm PABBO BB/  
 PULPROG: zg30  
 TD: 65536  
 SOLVENT: CDCl3  
 NS: 16  
 DS: 2  
 SWH: 8223.685 Hz  
 FIDRES: 0.125483 Hz  
 AQ: 3.9845889 sec  
 RG: 32.47  
 DM: 60.800 usec  
 DE: 6.50 usec  
 TE: 292.9 K  
 D1: 1.00000000 sec  
 TDO: 1

===== CHANNEL f1 =====  
 NUC1: 1H  
 P1: 15.00 usec  
 PLW1: 12.60000038 W  
 SFO1: 400.1324710 MHz

F2 - Processing parameters  
 SI: 65536  
 SF: 400.1300049 MHz  
 WMW: EM  
 SSB: 0  
 LB: 0.30 Hz  
 GB: 0  
 PC: 1.00

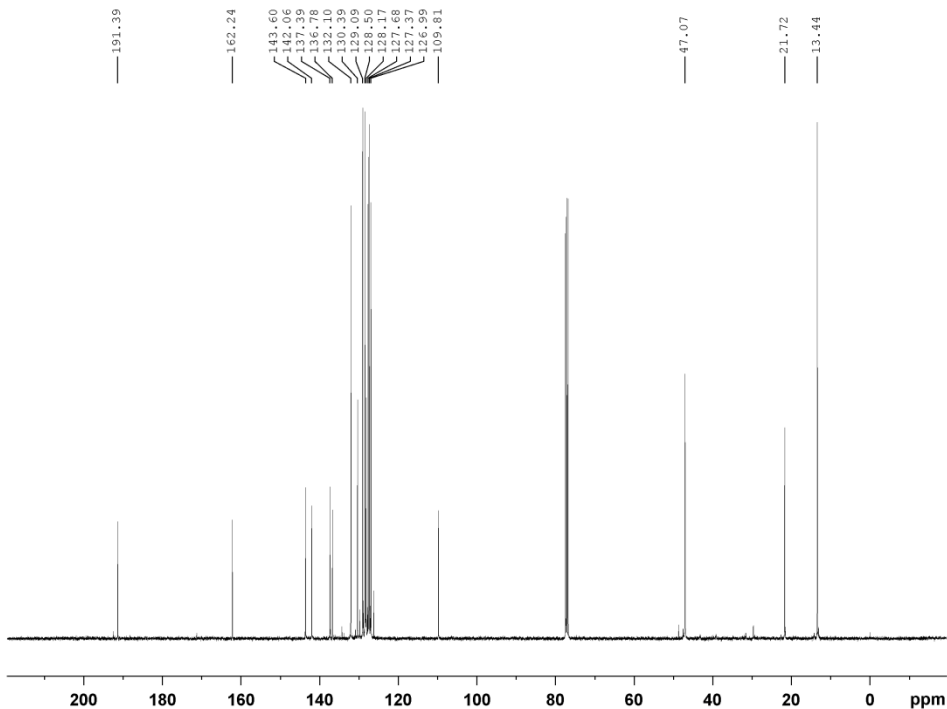

Current Data Parameters  
 Name: 3q  
 ExpNo: 2  
 ProcNo: 1

F2 - Acquisition Parameters  
 Date: 20140313  
 Time: 1.01  
 INSTRUM: spect  
 PROBHD: 5 mm PABBO BB/  
 PULPROG: zgpg30  
 TD: 65536  
 SOLVENT: CDCl3  
 NS: 1024  
 DS: 4  
 SWH: 24036.461 Hz  
 FIDRES: 0.366798 Hz  
 AQ: 1.2631488 sec  
 RG: 186.53  
 DM: 20.800 usec  
 DE: 6.50 usec  
 TE: 294.3 K  
 D1: 2.00000000 sec  
 d11: 0.03000000 sec  
 DELTA: 1.89999998 sec  
 TDO: 1  
 SFO1: 100.6228293 MHz  
 NUC1: 13C  
 P1: 9.98 usec  
 PLW1: 52.09999847 W  
 SFO2: 400.1316005 MHz  
 NUC2: 1H  
 CPDPRG12: waltz16  
 FCF2: 90.00 usec  
 PLW2: 12.60000038 W  
 PLW12: 0.34999999 W  
 PLW13: 0.28349999 W

F2 - Processing parameters  
 SI: 32768  
 SF: 100.6127690 MHz  
 WMW: EM  
 SSB: 0  
 LB: 1.00 Hz  
 GB: 0  
 PC: 1.40



**(Z)-N-(3-(4-(tert-butyl)phenyl)-1-(dimethylamino)-3-oxo-1-phenylprop-1-en-2-yl)-4-methylbenzenesulfonamide (3r):**

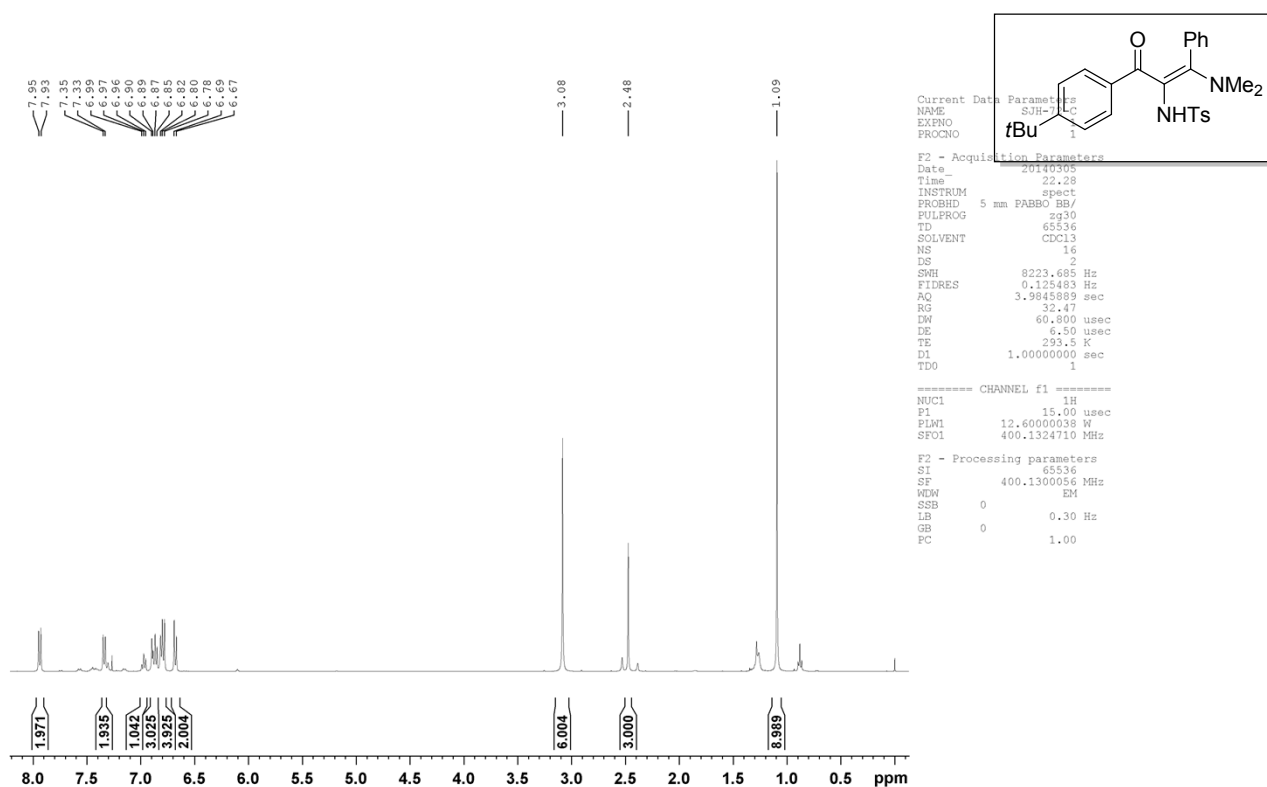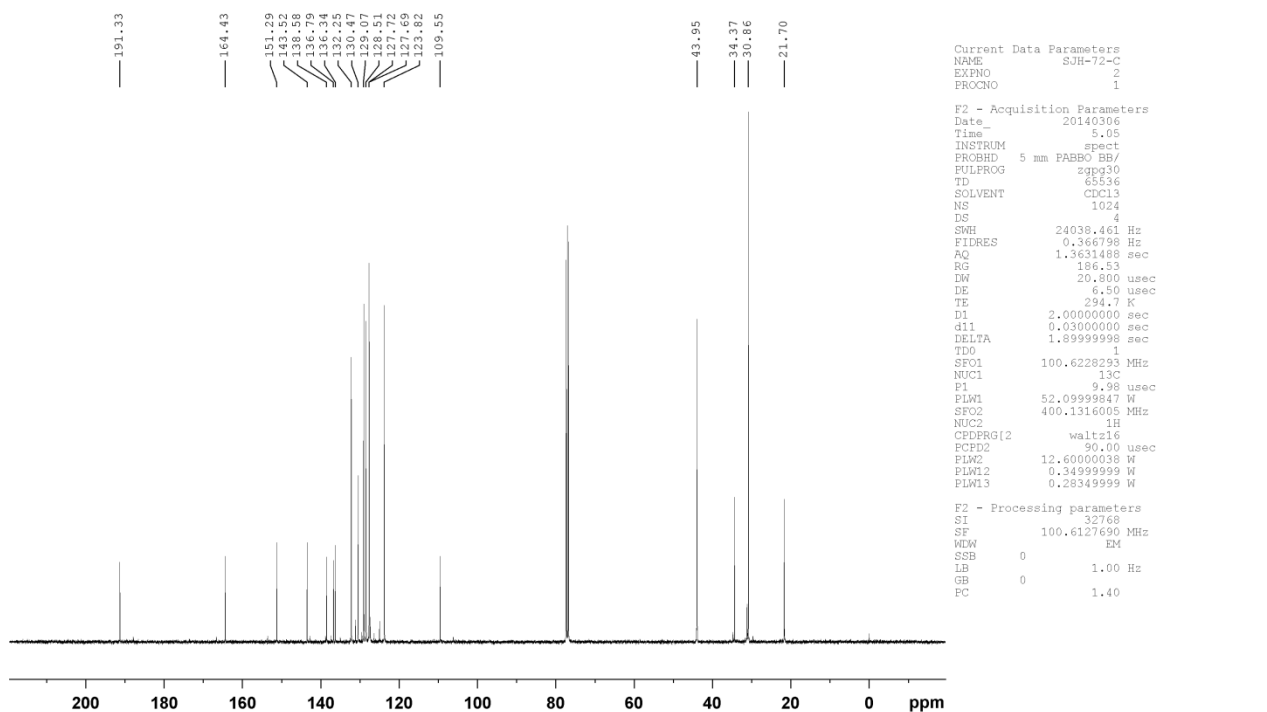

**(Z)-N-(1-(dimethylamino)-3-(4-methoxyphenyl)-3-oxo-1-phenylprop-1-en-2-yl)-4-methylbenzenesulfonamide (3s):**

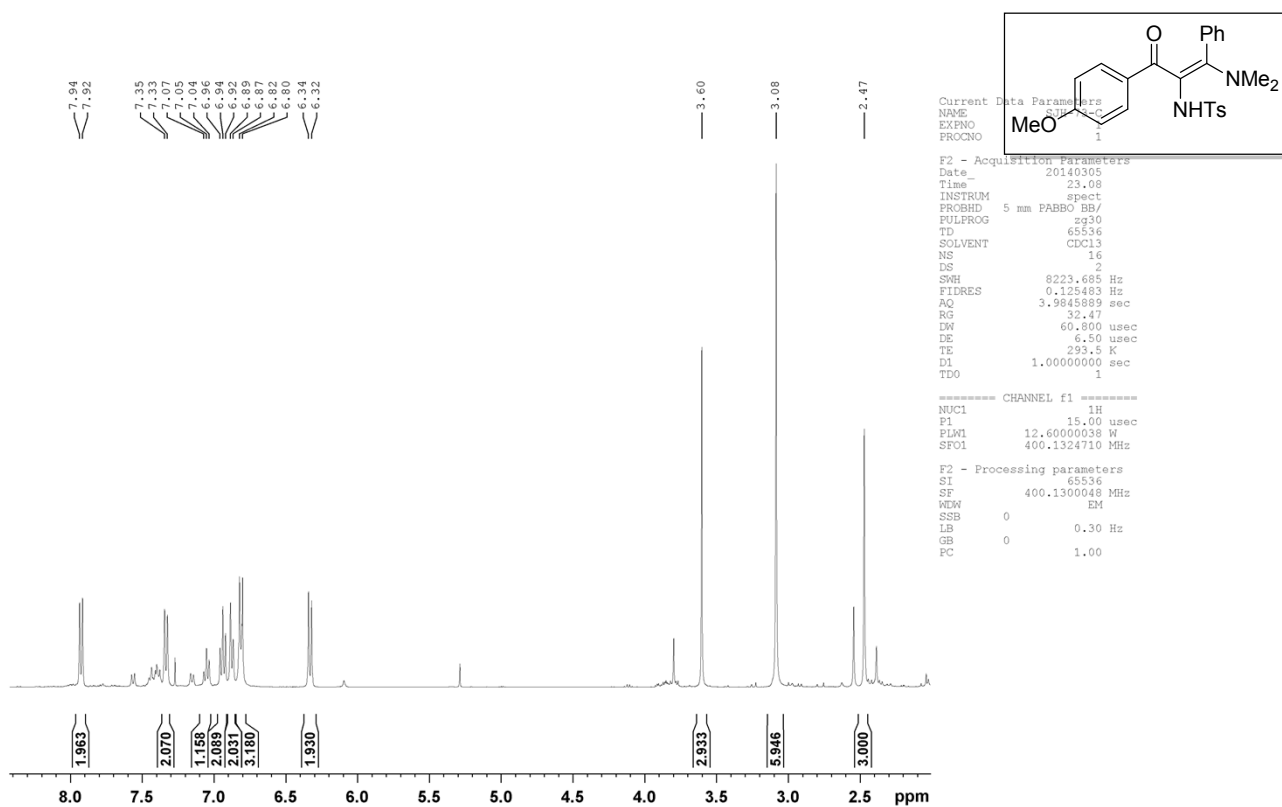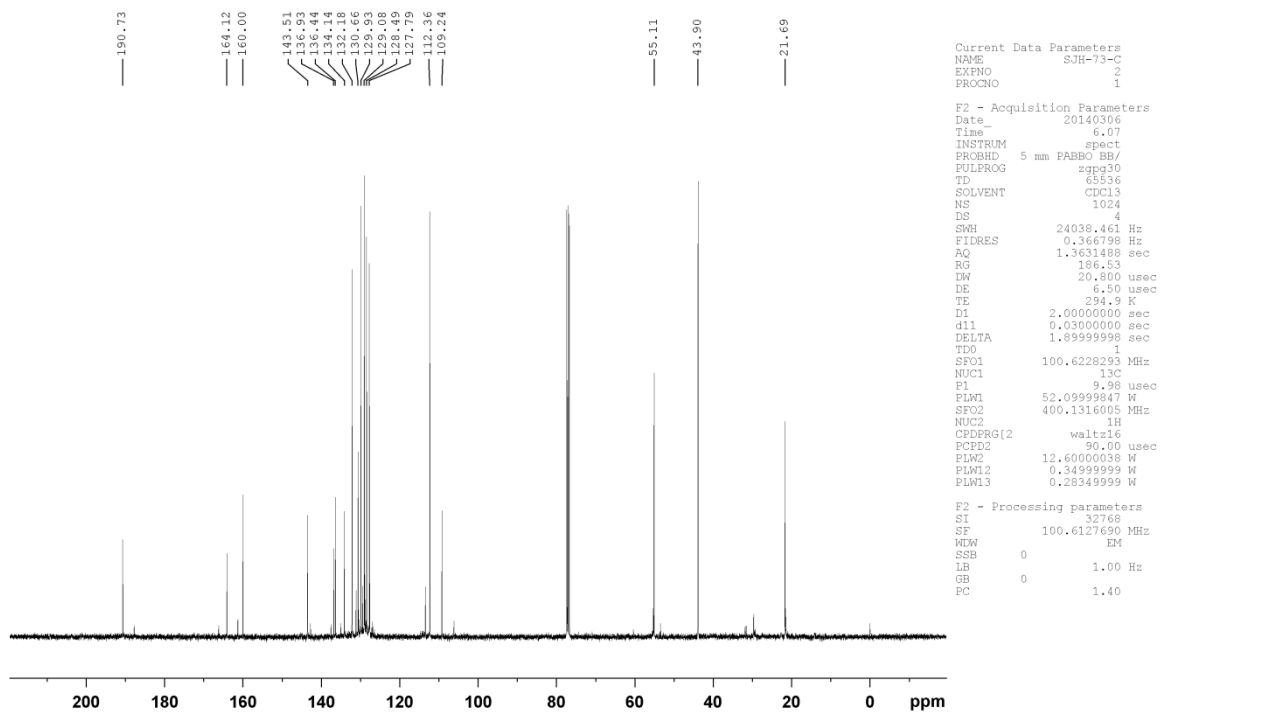

**(Z)-N-(3-(4-bromophenyl)-1-(dimethylamino)-3-oxo-1-phenylprop-1-en-2-yl)-4-methylbenzenesulfonamide (3t):**

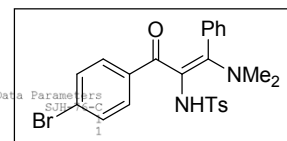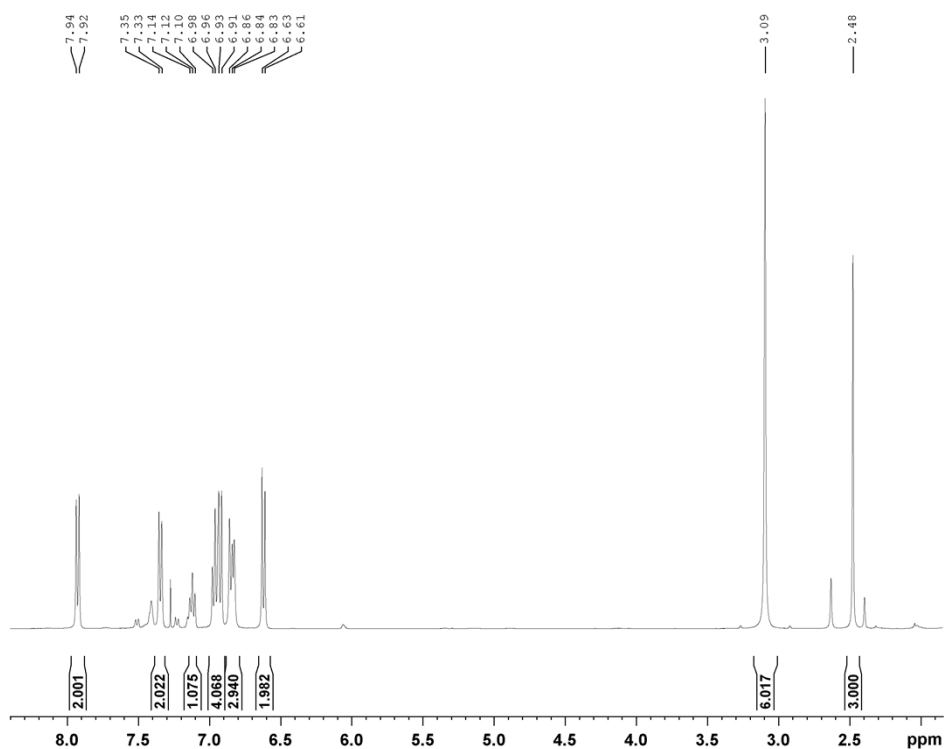

Current Data Parameters  
 NAME SJH-76-C  
 EXPNO 1  
 PROCNO 1

F2 - Acquisition Parameters  
 Date\_ 20140309  
 Time\_ 23.10  
 INSTRUM spect  
 PROBHD 5 mm PABBO BB/  
 PULPROG zg30  
 TD 65536  
 SOLVENT CDCl3  
 NS 16  
 DS 2  
 SWH 8223.685 Hz  
 FIDRES 0.125483 Hz  
 AQ 3.9845889 sec  
 RG 51.11  
 DW 60.800 usec  
 DE 6.50 usec  
 TE 293.1 K  
 D1 1.00000000 sec  
 TDO 1

===== CHANNEL f1 =====  
 NUC1 1H  
 P1 15.00 usec  
 PLW1 12.6000038 W  
 SFO1 400.1324710 MHz

F2 - Processing parameters  
 SI 65536  
 SF 400.1300046 MHz  
 WDW EM  
 SSB 0  
 LB 0.30 Hz  
 GB 0  
 PC 1.00

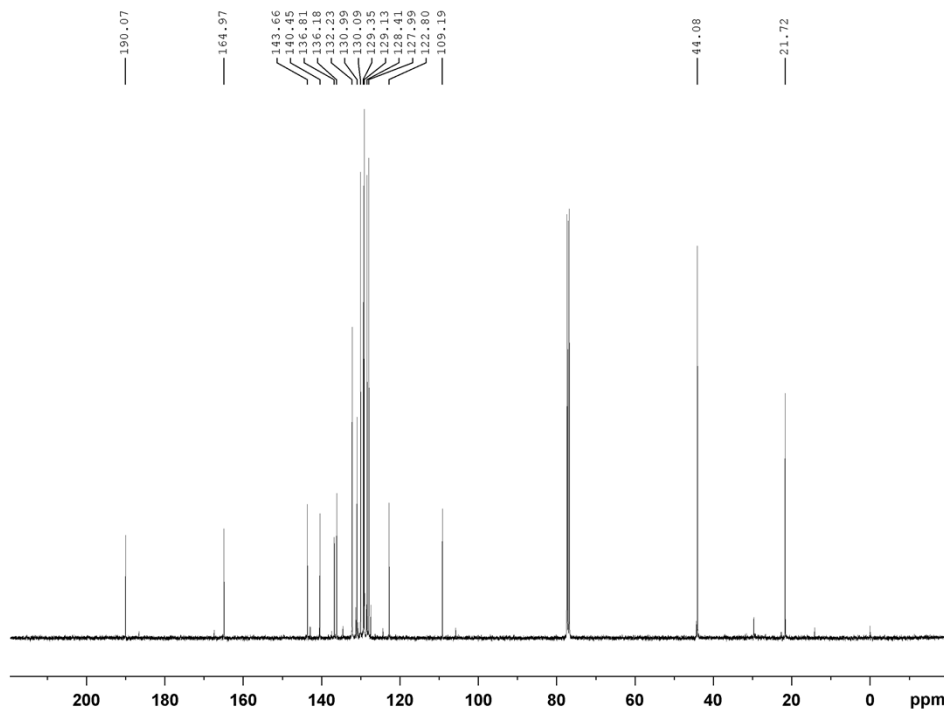

Current Data Parameters  
 NAME SJH-76-C  
 EXPNO 2  
 PROCNO 1

F2 - Acquisition Parameters  
 Date\_ 20140310  
 Time\_ 7.11  
 INSTRUM spect  
 PROBHD 5 mm PABBO BB/  
 PULPROG zgpg30  
 TD 65536  
 SOLVENT CDCl3  
 NS 1024  
 DS 4  
 SWH 24038.461 Hz  
 FIDRES 0.366798 Hz  
 AQ 1.3631488 sec  
 RG 186.53  
 DW 20.800 usec  
 DE 6.50 usec  
 TE 294.5 K  
 D1 2.00000000 sec  
 d11 0.03000000 sec  
 DELTA 1.89999998 sec  
 TDO 1  
 SFO1 100.6228293 MHz  
 NUC1 13C  
 P1 9.98 usec  
 PLW1 52.09999847 W  
 SFO2 400.1316005 MHz  
 NUC2 1H  
 CPDPRG12 waltz16  
 FCF2 90.00 usec  
 PLW2 12.6000038 W  
 PLW3 0.34999999 W  
 PLW4 0.28349999 W

F2 - Processing parameters  
 SI 32768  
 SF 100.6127690 MHz  
 WDW EM  
 SSB 0  
 LB 1.00 Hz  
 GB 0  
 PC 1.40

**(Z)-N-(1-(dimethylamino)-3-(4-fluorophenyl)-3-oxo-1-phenylprop-1-en-2-yl)-4-methylbenzenesulfonamide (3u):**

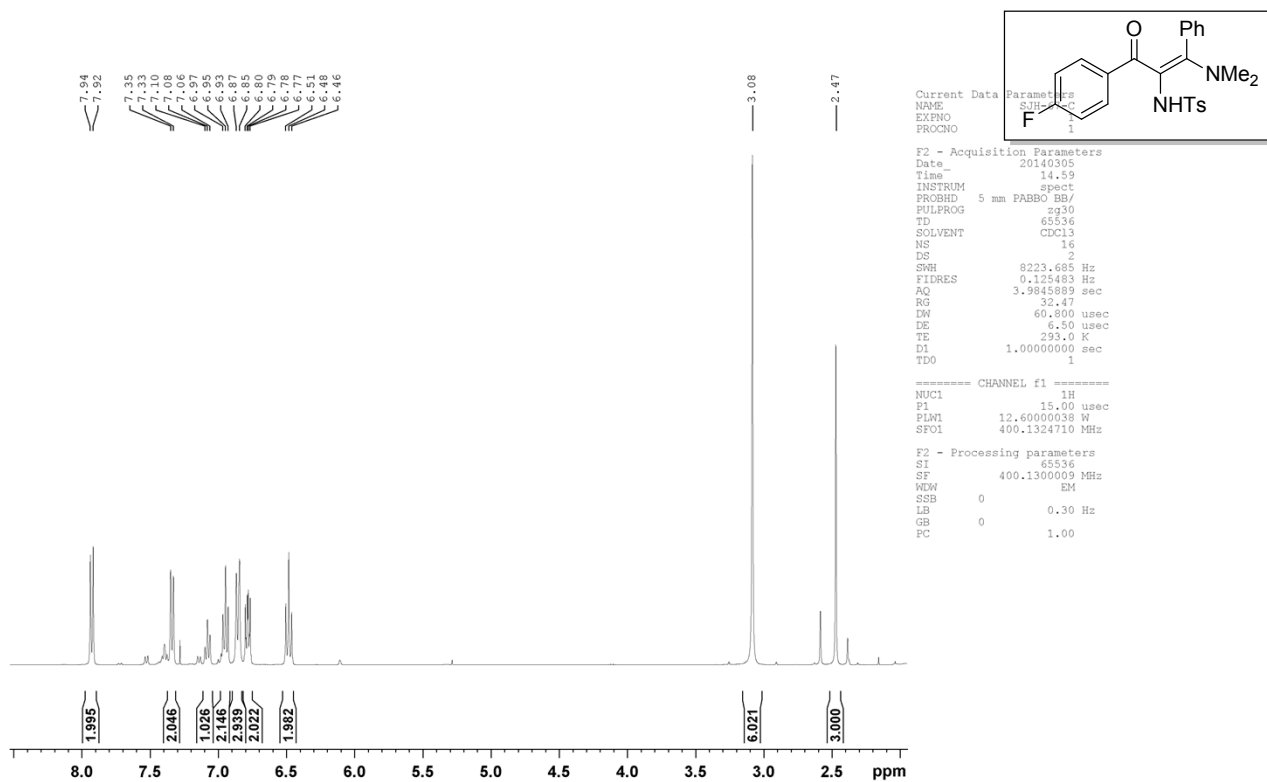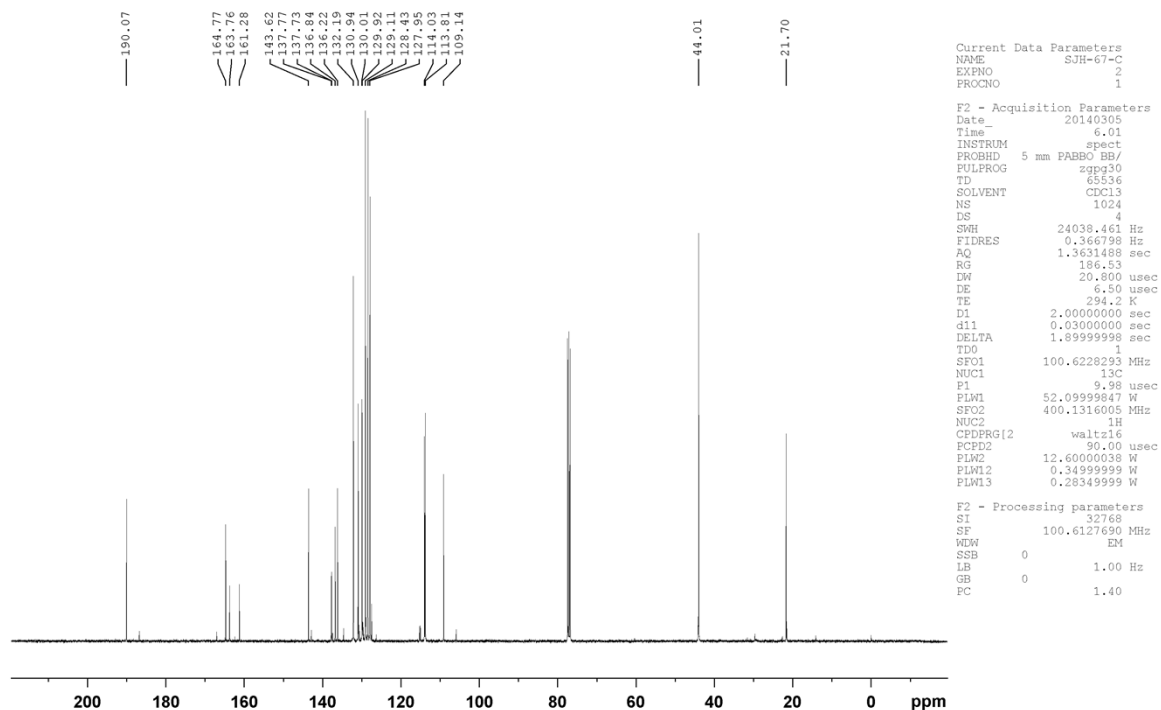

**(Z)-N-(1-(dimethylamino)-3-oxo-1-phenyl-3-(4-(trifluoromethyl)phenyl)prop-1-en-2-yl)-4-methylbenzenesulfonamide (3v):**

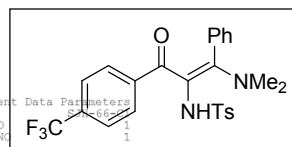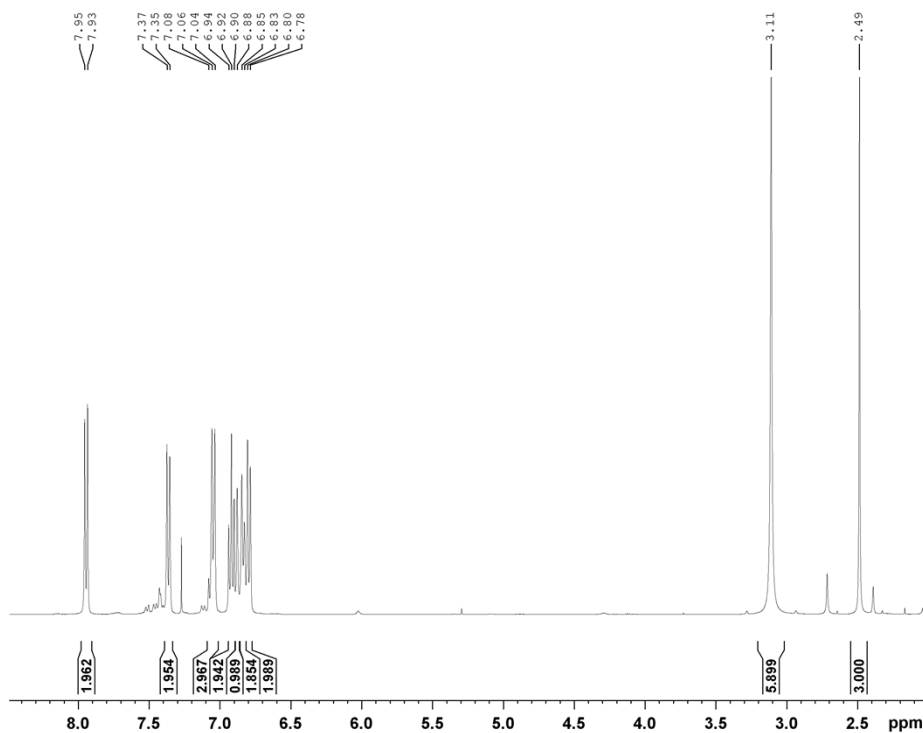

Current Data Parameters  
 NAME SJH-66-C1  
 EXPNO 2  
 PROCNO 1

F2 - Acquisition Parameters  
 Date\_ 20140227  
 Time 22.36  
 INSTRUM spect  
 PROBHD 5 mm PABBO BB/  
 PULPROG zg30  
 TD 65536  
 SOLVENT CDCl3  
 NS 16  
 DS 2  
 SWH 8223.685 Hz  
 FIDRES 0.125483 Hz  
 AQ 3.9845889 sec  
 RG 54.15  
 LW 60.800 usec  
 DE 6.50 usec  
 TE 293.0 K  
 D1 1.00000000 sec  
 TDO 1

==== CHANNEL f1 =====  
 NUC1 1H  
 P1 15.00 usec  
 PLW1 12.6000038 W  
 SFO1 400.1324710 MHz

F2 - Processing parameters  
 SI 65536  
 SF 400.1300053 MHz  
 WDW EM  
 SSB 0  
 LB 0.30 Hz  
 GB 0  
 FC 1.00

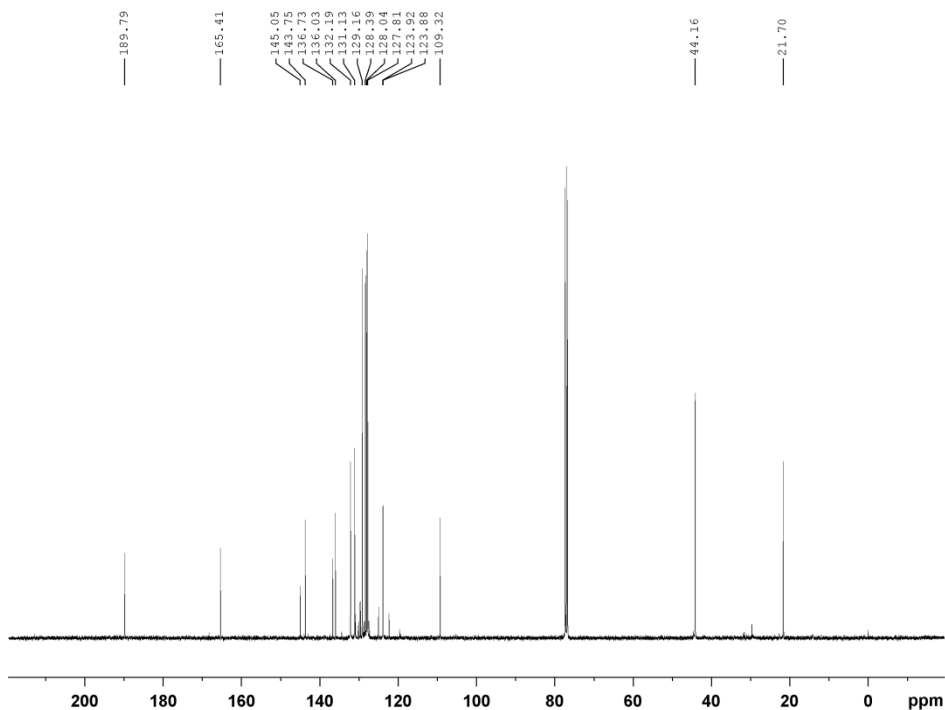

Current Data Parameters  
 NAME SJH-66-C1  
 EXPNO 2  
 PROCNO 1

F2 - Acquisition Parameters  
 Date\_ 20140228  
 Time 4.03  
 INSTRUM spect  
 PROBHD 5 mm PABBO BB/  
 PULPROG zgpg30  
 TD 65536  
 SOLVENT CDCl3  
 NS 1024  
 DS 4  
 SWH 24038.461 Hz  
 FIDRES 0.366798 Hz  
 AQ 1.3631488 sec  
 RG 186.53  
 LW 20.800 usec  
 DE 6.50 usec  
 TE 294.3 K  
 D1 2.00000000 sec  
 d11 0.03000000 sec  
 DELTA 1.89999998 sec  
 TDO 1  
 SFO1 100.6228293 MHz  
 NUC1 13C  
 P1 9.98 usec  
 PLW1 52.09999847 W  
 SFO2 400.1316005 MHz  
 NUC2 1H  
 CPDPRG12 waltz16  
 PCPD2 90.00 usec  
 PLW2 12.6000038 W  
 PLW12 0.34999999 W  
 PLW13 0.28349999 W

F2 - Processing parameters  
 SI 32768  
 SF 100.6127690 MHz  
 WDW EM  
 SSB 0  
 LB 1.00 Hz  
 GB 0  
 FC 1.40

**(Z)-N-(1-(dimethylamino)-3-oxo-1-phenyl-3-(m-tolyl)prop-1-en-2-yl)-4-methylbenzenesulfonamide (3w):**

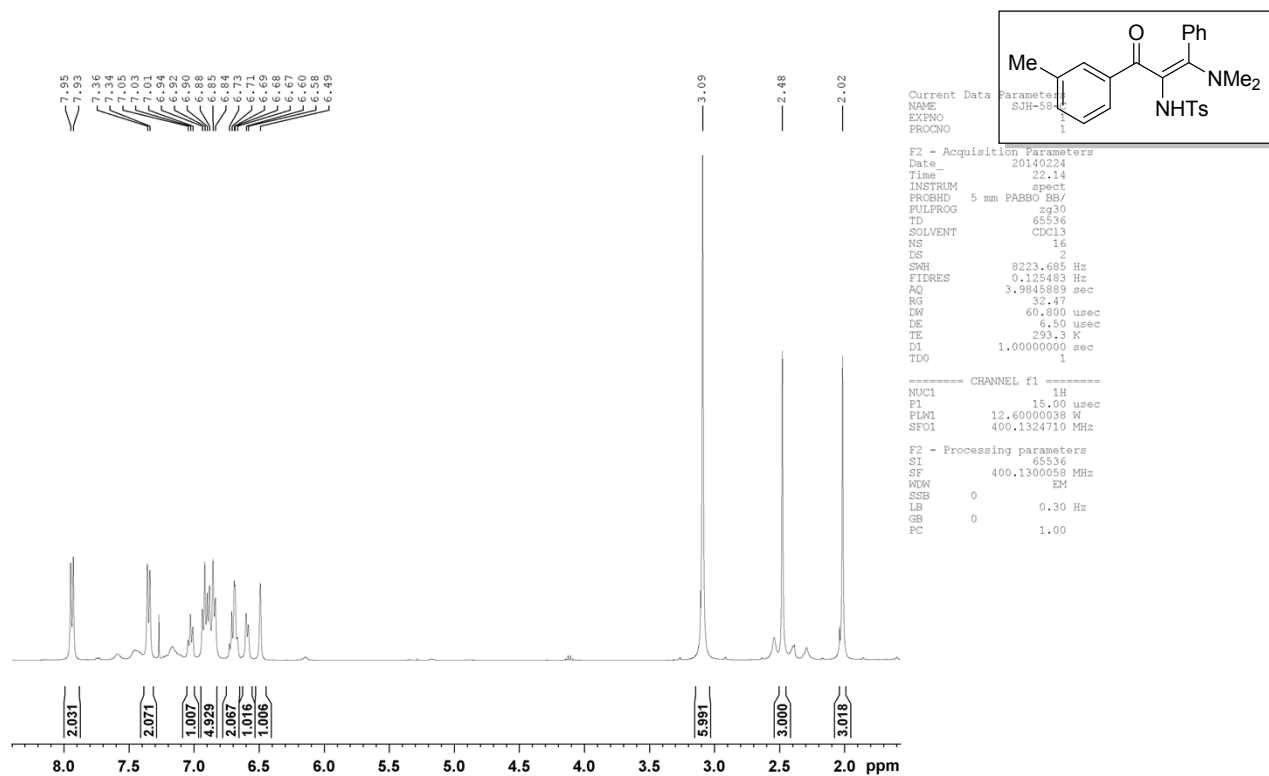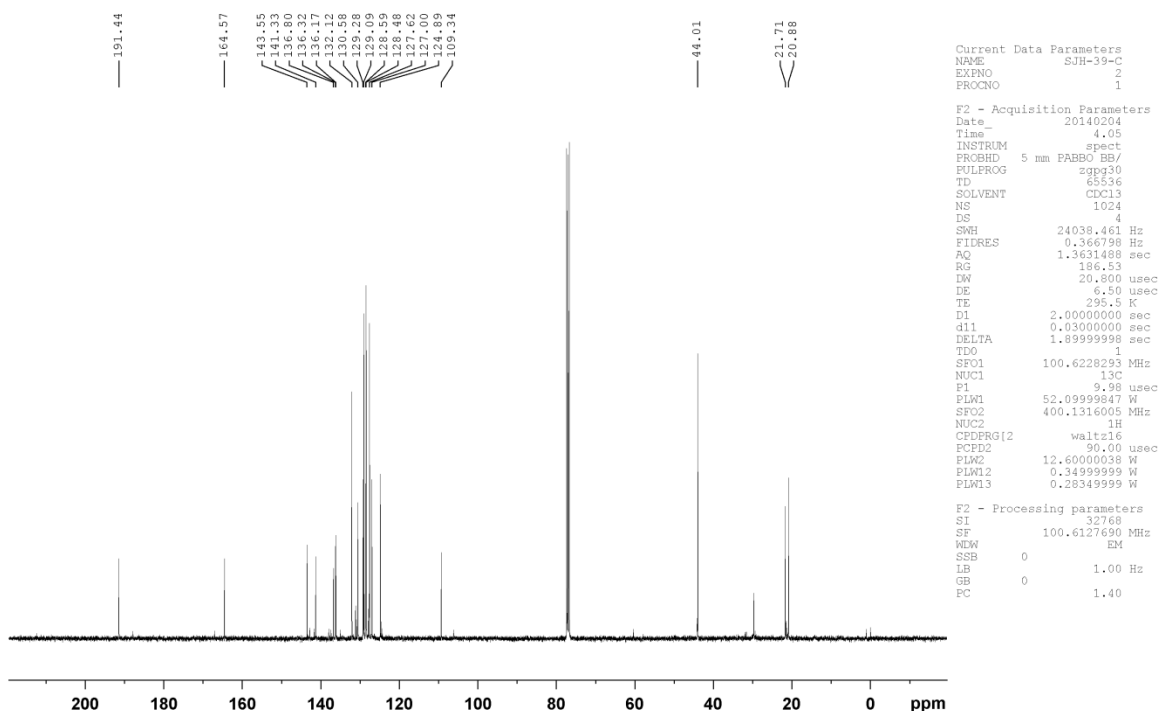

**(Z)-N-(1-(dimethylamino)-3-(3-fluorophenyl)-3-oxo-1-phenylprop-1-en-2-yl)-4-methylbenzenesulfonamide (3x):**

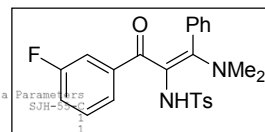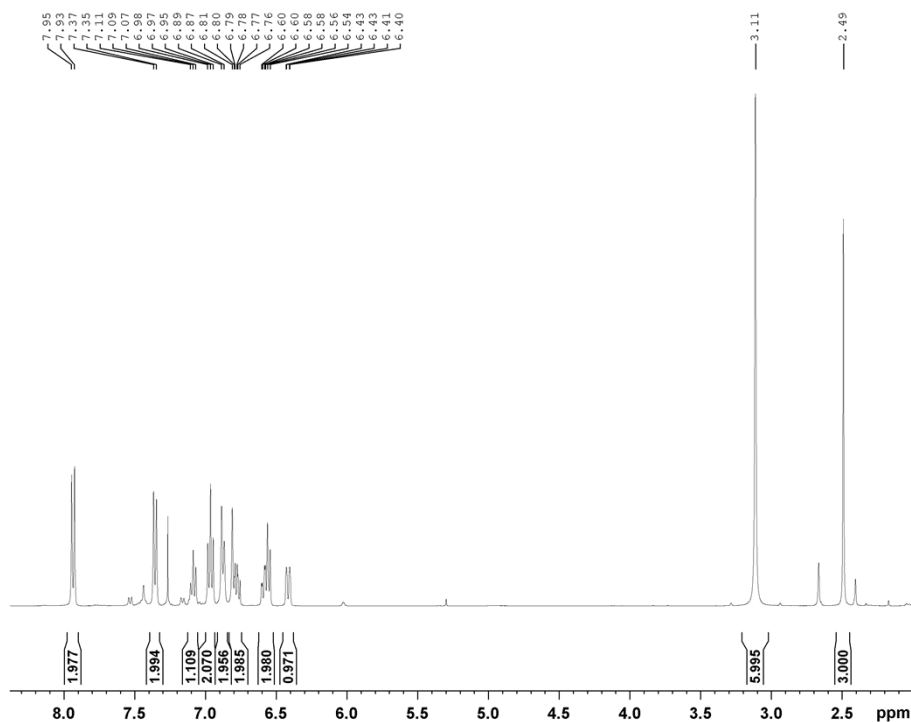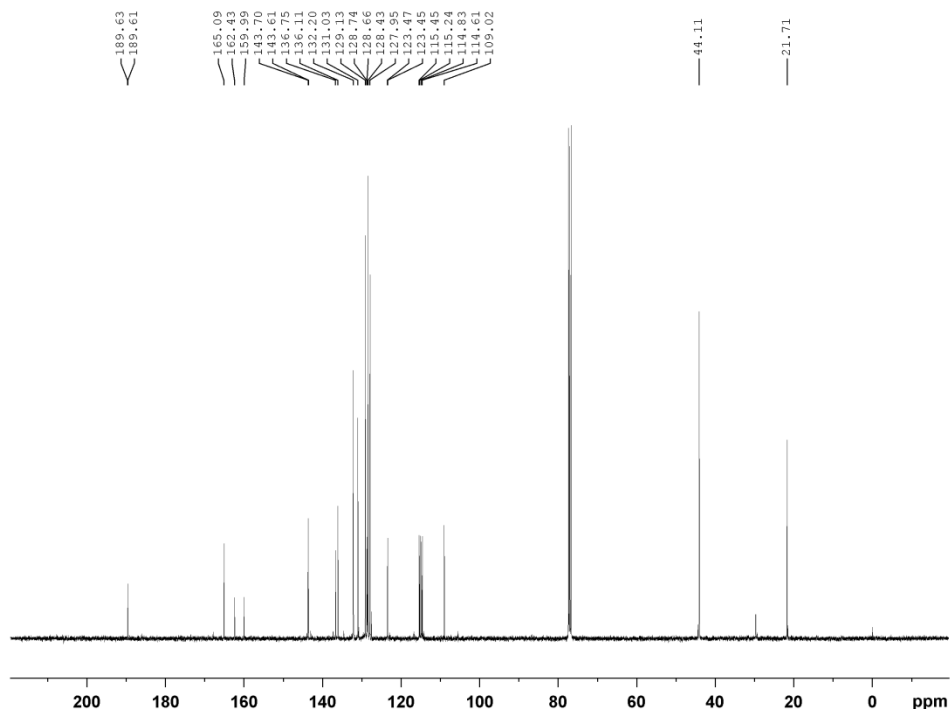

**(Z)-N-(1-(dimethylamino)-3-oxo-1-phenyl-3-(thiophen-3-yl)prop-1-en-2-yl)-4-methylbenzenesulfonamide (3y):**

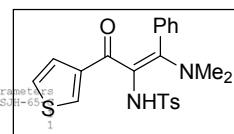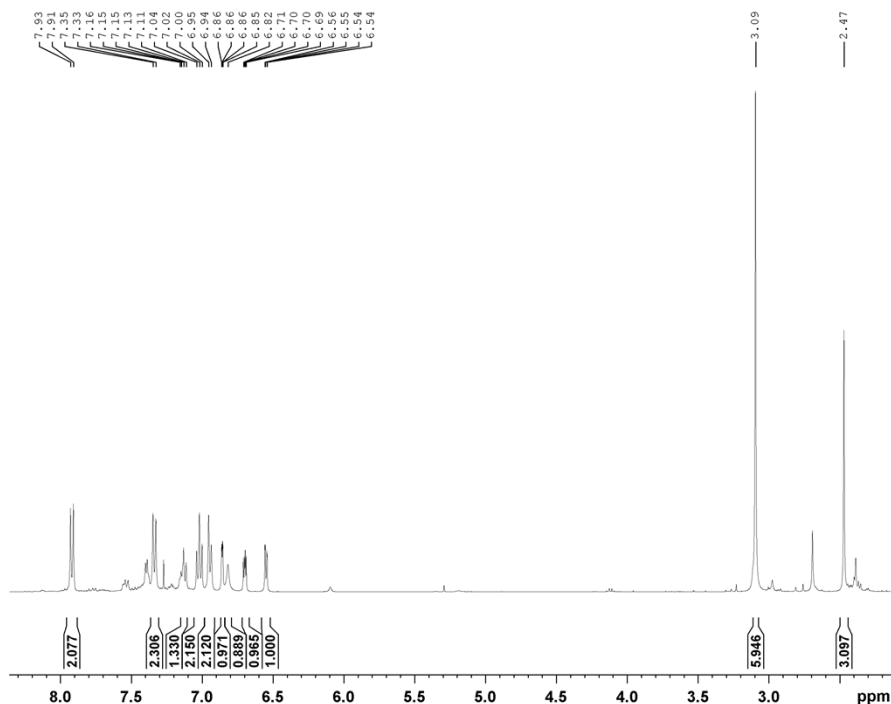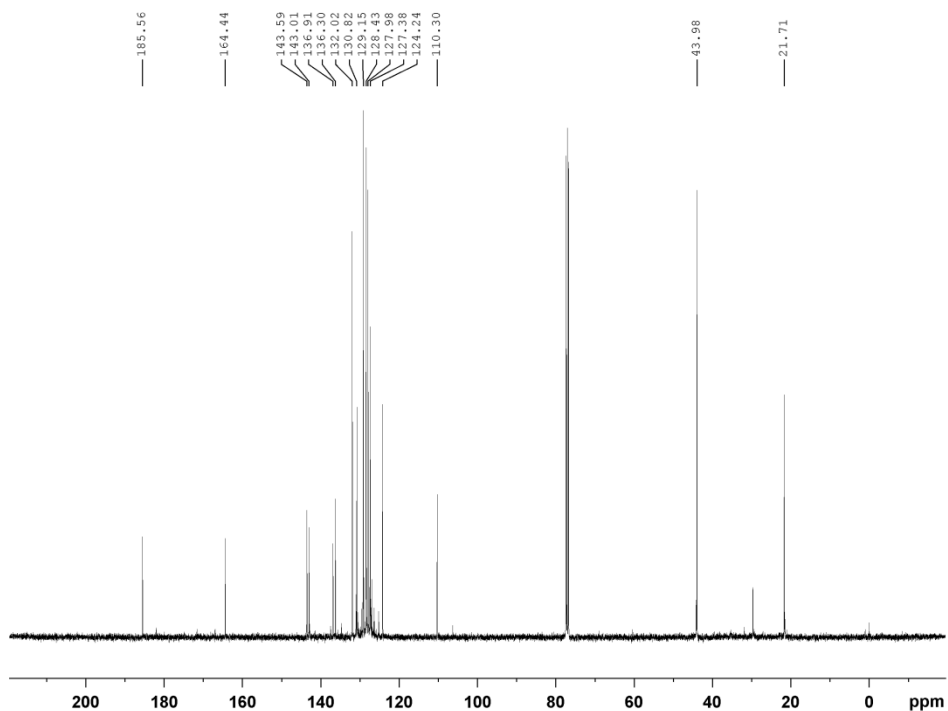



**(Z)-N-(1-(dimethylamino)-3-oxo-1,3-diphenylprop-1-en-2-yl)benzenesulfonamide (3z):**

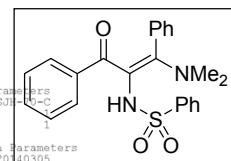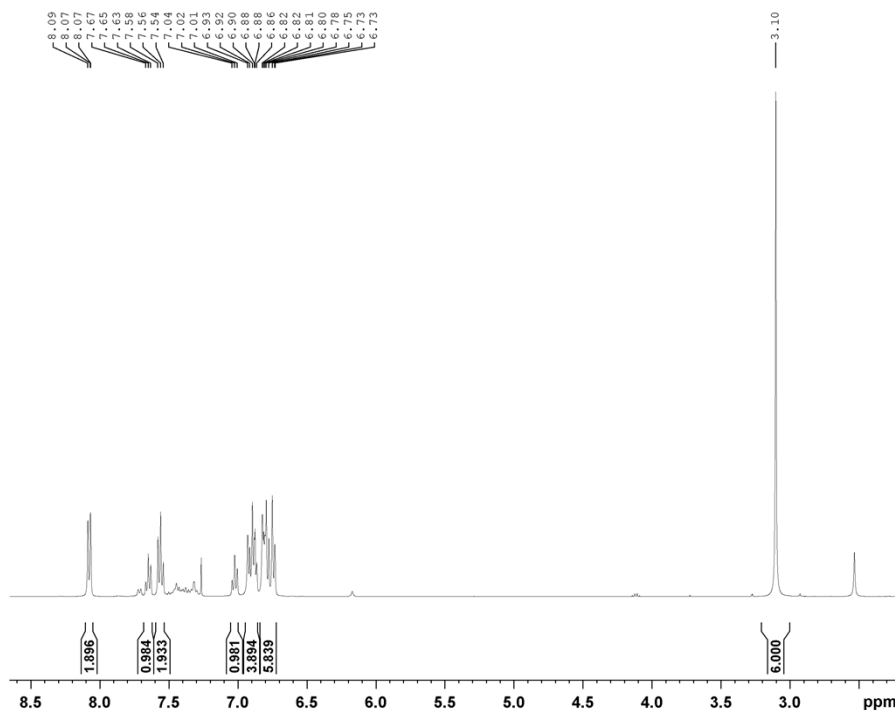

```
Current Data Parameters
NAME SJH-0-C
EXPNO 1
PROCNO 1

F2 - Acquisition Parameters
Date_ 20140305
Time_ 22.24
INSTRUM spect
PROBHD 5 mm PABBO BB/
PULPROG zg30
TD 65536
SOLVENT CDCl3
NS 16
DS 2
SWH 8223.685 Hz
FIDRES 0.125483 Hz
AQ 3.9845889 sec
RG 58.19
LW 60.800 usec
DE 6.50 usec
TE 293.5 K
D1 1.00000000 sec
D11 1
D12 1
D13 1
D14 1
D15 1
D16 1
D17 1
D18 1
D19 1
D20 1
D21 1
D22 1
D23 1
D24 1
D25 1
D26 1
D27 1
D28 1
D29 1
D30 1
D31 1
D32 1
D33 1
D34 1
D35 1
D36 1
D37 1
D38 1
D39 1
D40 1
D41 1
D42 1
D43 1
D44 1
D45 1
D46 1
D47 1
D48 1
D49 1
D50 1
D51 1
D52 1
D53 1
D54 1
D55 1
D56 1
D57 1
D58 1
D59 1
D60 1
D61 1
D62 1
D63 1
D64 1
D65 1
D66 1
D67 1
D68 1
D69 1
D70 1
D71 1
D72 1
D73 1
D74 1
D75 1
D76 1
D77 1
D78 1
D79 1
D80 1
D81 1
D82 1
D83 1
D84 1
D85 1
D86 1
D87 1
D88 1
D89 1
D90 1
D91 1
D92 1
D93 1
D94 1
D95 1
D96 1
D97 1
D98 1
D99 1
D100 1
D101 1
D102 1
D103 1
D104 1
D105 1
D106 1
D107 1
D108 1
D109 1
D110 1
D111 1
D112 1
D113 1
D114 1
D115 1
D116 1
D117 1
D118 1
D119 1
D120 1
D121 1
D122 1
D123 1
D124 1
D125 1
D126 1
D127 1
D128 1
D129 1
D130 1
D131 1
D132 1
D133 1
D134 1
D135 1
D136 1
D137 1
D138 1
D139 1
D140 1
D141 1
D142 1
D143 1
D144 1
D145 1
D146 1
D147 1
D148 1
D149 1
D150 1
D151 1
D152 1
D153 1
D154 1
D155 1
D156 1
D157 1
D158 1
D159 1
D160 1
D161 1
D162 1
D163 1
D164 1
D165 1
D166 1
D167 1
D168 1
D169 1
D170 1
D171 1
D172 1
D173 1
D174 1
D175 1
D176 1
D177 1
D178 1
D179 1
D180 1
D181 1
D182 1
D183 1
D184 1
D185 1
D186 1
D187 1
D188 1
D189 1
D190 1
D191 1
D192 1
D193 1
D194 1
D195 1
D196 1
D197 1
D198 1
D199 1
D200 1
D201 1
D202 1
D203 1
D204 1
D205 1
D206 1
D207 1
D208 1
D209 1
D210 1
D211 1
D212 1
D213 1
D214 1
D215 1
D216 1
D217 1
D218 1
D219 1
D220 1
D221 1
D222 1
D223 1
D224 1
D225 1
D226 1
D227 1
D228 1
D229 1
D230 1
D231 1
D232 1
D233 1
D234 1
D235 1
D236 1
D237 1
D238 1
D239 1
D240 1
D241 1
D242 1
D243 1
D244 1
D245 1
D246 1
D247 1
D248 1
D249 1
D250 1
D251 1
D252 1
D253 1
D254 1
D255 1
D256 1
D257 1
D258 1
D259 1
D260 1
D261 1
D262 1
D263 1
D264 1
D265 1
D266 1
D267 1
D268 1
D269 1
D270 1
D271 1
D272 1
D273 1
D274 1
D275 1
D276 1
D277 1
D278 1
D279 1
D280 1
D281 1
D282 1
D283 1
D284 1
D285 1
D286 1
D287 1
D288 1
D289 1
D290 1
D291 1
D292 1
D293 1
D294 1
D295 1
D296 1
D297 1
D298 1
D299 1
D300 1
D301 1
D302 1
D303 1
D304 1
D305 1
D306 1
D307 1
D308 1
D309 1
D310 1
D311 1
D312 1
D313 1
D314 1
D315 1
D316 1
D317 1
D318 1
D319 1
D320 1
D321 1
D322 1
D323 1
D324 1
D325 1
D326 1
D327 1
D328 1
D329 1
D330 1
D331 1
D332 1
D333 1
D334 1
D335 1
D336 1
D337 1
D338 1
D339 1
D340 1
D341 1
D342 1
D343 1
D344 1
D345 1
D346 1
D347 1
D348 1
D349 1
D350 1
D351 1
D352 1
D353 1
D354 1
D355 1
D356 1
D357 1
D358 1
D359 1
D360 1
D361 1
D362 1
D363 1
D364 1
D365 1
D366 1
D367 1
D368 1
D369 1
D370 1
D371 1
D372 1
D373 1
D374 1
D375 1
D376 1
D377 1
D378 1
D379 1
D380 1
D381 1
D382 1
D383 1
D384 1
D385 1
D386 1
D387 1
D388 1
D389 1
D390 1
D391 1
D392 1
D393 1
D394 1
D395 1
D396 1
D397 1
D398 1
D399 1
D400 1
D401 1
D402 1
D403 1
D404 1
D405 1
D406 1
D407 1
D408 1
D409 1
D410 1
D411 1
D412 1
D413 1
D414 1
D415 1
D416 1
D417 1
D418 1
D419 1
D420 1
D421 1
D422 1
D423 1
D424 1
D425 1
D426 1
D427 1
D428 1
D429 1
D430 1
D431 1
D432 1
D433 1
D434 1
D435 1
D436 1
D437 1
D438 1
D439 1
D440 1
D441 1
D442 1
D443 1
D444 1
D445 1
D446 1
D447 1
D448 1
D449 1
D450 1
D451 1
D452 1
D453 1
D454 1
D455 1
D456 1
D457 1
D458 1
D459 1
D460 1
D461 1
D462 1
D463 1
D464 1
D465 1
D466 1
D467 1
D468 1
D469 1
D470 1
D471 1
D472 1
D473 1
D474 1
D475 1
D476 1
D477 1
D478 1
D479 1
D480 1
D481 1
D482 1
D483 1
D484 1
D485 1
D486 1
D487 1
D488 1
D489 1
D490 1
D491 1
D492 1
D493 1
D494 1
D495 1
D496 1
D497 1
D498 1
D499 1
D500 1
D501 1
D502 1
D503 1
D504 1
D505 1
D506 1
D507 1
D508 1
D509 1
D510 1
D511 1
D512 1
D513 1
D514 1
D515 1
D516 1
D517 1
D518 1
D519 1
D520 1
D521 1
D522 1
D523 1
D524 1
D525 1
D526 1
D527 1
D528 1
D529 1
D530 1
D531 1
D532 1
D533 1
D534 1
D535 1
D536 1
D537 1
D538 1
D539 1
D540 1
D541 1
D542 1
D543 1
D544 1
D545 1
D546 1
D547 1
D548 1
D549 1
D550 1
D551 1
D552 1
D553 1
D554 1
D555 1
D556 1
D557 1
D558 1
D559 1
D560 1
D561 1
D562 1
D563 1
D564 1
D565 1
D566 1
D567 1
D568 1
D569 1
D570 1
D571 1
D572 1
D573 1
D574 1
D575 1
D576 1
D577 1
D578 1
D579 1
D580 1
D581 1
D582 1
D583 1
D584 1
D585 1
D586 1
D587 1
D588 1
D589 1
D590 1
D591 1
D592 1
D593 1
D594 1
D595 1
D596 1
D597 1
D598 1
D599 1
D600 1
D601 1
D602 1
D603 1
D604 1
D605 1
D606 1
D607 1
D608 1
D609 1
D610 1
D611 1
D612 1
D613 1
D614 1
D615 1
D616 1
D617 1
D618 1
D619 1
D620 1
D621 1
D622 1
D623 1
D624 1
D625 1
D626 1
D627 1
D628 1
D629 1
D630 1
D631 1
D632 1
D633 1
D634 1
D635 1
D636 1
D637 1
D638 1
D639 1
D640 1
D641 1
D642 1
D643 1
D644 1
D645 1
D646 1
D647 1
D648 1
D649 1
D650 1
D651 1
D652 1
D653 1
D654 1
D655 1
D656 1
D657 1
D658 1
D659 1
D660 1
D661 1
D662 1
D663 1
D664 1
D665 1
D666 1
D667 1
D668 1
D669 1
D670 1
D671 1
D672 1
D673 1
D674 1
D675 1
D676 1
D677 1
D678 1
D679 1
D680 1
D681 1
D682 1
D683 1
D684 1
D685 1
D686 1
D687 1
D688 1
D689 1
D690 1
D691 1
D692 1
D693 1
D694 1
D695 1
D696 1
D697 1
D698 1
D699 1
D700 1
D701 1
D702 1
D703 1
D704 1
D705 1
D706 1
D707 1
D708 1
D709 1
D710 1
D711 1
D712 1
D713 1
D714 1
D715 1
D716 1
D717 1
D718 1
D719 1
D720 1
D721 1
D722 1
D723 1
D724 1
D725 1
D726 1
D727 1
D728 1
D729 1
D730 1
D731 1
D732 1
D733 1
D734 1
D735 1
D736 1
D737 1
D738 1
D739 1
D740 1
D741 1
D742 1
D743 1
D744 1
D745 1
D746 1
D747 1
D748 1
D749 1
D750 1
D751 1
D752 1
D753 1
D754 1
D755 1
D756 1
D757 1
D758 1
D759 1
D760 1
D761 1
D762 1
D763 1
D764 1
D765 1
D766 1
D767 1
D768 1
D769 1
D770 1
D771 1
D772 1
D773 1
D774 1
D775 1
D776 1
D777 1
D778 1
D779 1
D780 1
D781 1
D782 1
D783 1
D784 1
D785 1
D786 1
D787 1
D788 1
D789 1
D790 1
D791 1
D792 1
D793 1
D794 1
D795 1
D796 1
D797 1
D798 1
D799 1
D800 1
D801 1
D802 1
D803 1
D804 1
D805 1
D806 1
D807 1
D808 1
D809 1
D810 1
D811 1
D812 1
D813 1
D814 1
D815 1
D816 1
D817 1
D818 1
D819 1
D820 1
D821 1
D822 1
D823 1
D824 1
D825 1
D826 1
D827 1
D828 1
D829 1
D830 1
D831 1
D832 1
D833 1
D834 1
D835 1
D836 1
D837 1
D838 1
D839 1
D840 1
D841 1
D842 1
D843 1
D844 1
D845 1
D846 1
D847 1
D848 1
D849 1
D850 1
D851 1
D852 1
D853 1
D854 1
D855 1
D856 1
D857 1
D858 1
D859 1
D860 1
D861 1
D862 1
D863 1
D864 1
D865 1
D866 1
D867 1
D868 1
D869 1
D870 1
D871 1
D872 1
D873 1
D874 1
D875 1
D876 1
D877 1
D878 1
D879 1
D880 1
D881 1
D882 1
D883 1
D884 1
D885 1
D886 1
D887 1
D888 1
D889 1
D890 1
D891 1
D892 1
D893 1
D894 1
D895 1
D896 1
D897 1
D898 1
D899 1
D900 1
D901 1
D902 1
D903 1
D904 1
D905 1
D906 1
D907 1
D908 1
D909 1
D910 1
D911 1
D912 1
D913 1
D914 1
D915 1
D916 1
D917 1
D918 1
D919 1
D920 1
D921 1
D922 1
D923 1
D924 1
D925 1
D926 1
D927 1
D928 1
D929 1
D930 1
D931 1
D932 1
D933 1
D934 1
D935 1
D936 1
D937 1
D938 1
D939 1
D940 1
D941 1
D942 1
D943 1
D944 1
D945 1
D946 1
D947 1
D948 1
D949 1
D950 1
D951 1
D952 1
D953 1
D954 1
D955 1
D956 1
D957 1
D958 1
D959 1
D960 1
D961 1
D962 1
D963 1
D964 1
D965 1
D966 1
D967 1
D968 1
D969 1
D970 1
D971 1
D972 1
D973 1
D974 1
D975 1
D976 1
D977 1
D978 1
D979 1
D980 1
D981 1
D982 1
D983 1
D984 1
D985 1
D986 1
D987 1
D988 1
D989 1
D990 1
D991 1
D992 1
D993 1
D994 1
D995 1
D996 1
D997 1
D998 1
D999 1
D1000 1
```

```
===== CHANNEL f1 =====
NUC1 1H
P1 15.00 usec
PLW1 12.6000038 W
SFO1 400.1324710 MHz

F2 - Processing parameters
SI 65536
SF 400.1300066 MHz
WDW EM
SSB 0
LB 0.30 Hz
GB 0
PC 1.00
```

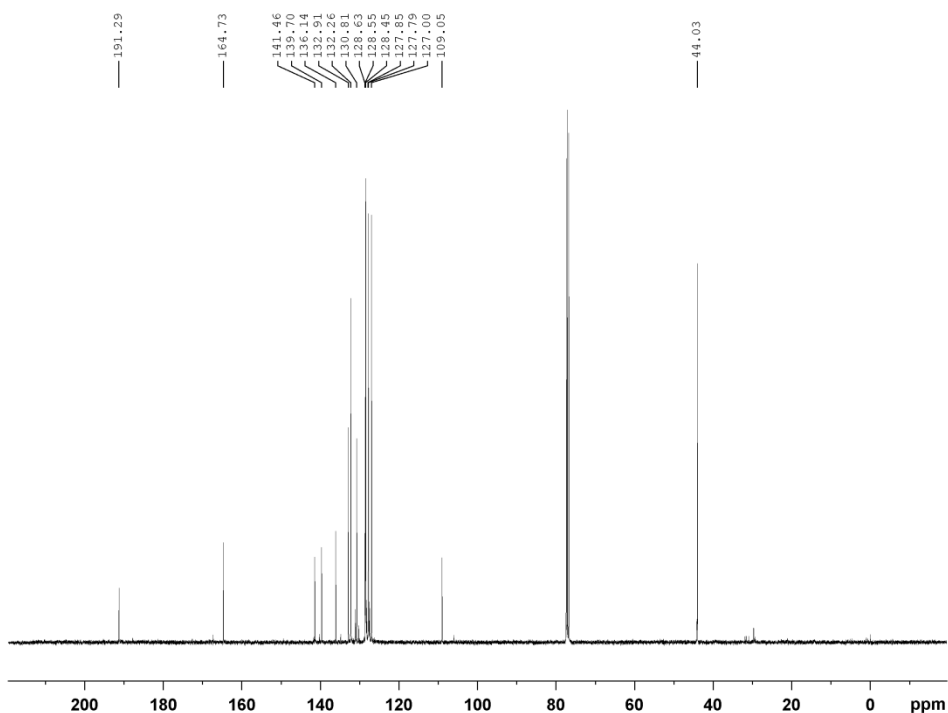

```
Current Data Parameters
NAME SJH-32-C
EXPNO 2
PROCNO 1

F2 - Acquisition Parameters
Date_ 20140122
Time_ 7.08
INSTRUM spect
PROBHD 5 mm PABBO BB/
PULPROG zgpg30
TD 65536
SOLVENT CDCl3
NS 1024
DS 4
SWH 24038.461 Hz
FIDRES 0.366798 Hz
AQ 1.3631488 sec
RG 186.53
LW 20.800 usec
DE 6.50 usec
TE 295.0 K
D1 2.00000000 sec
d11 0.03000000 sec
DELTA 1.89999998 sec
TDO 1
SFO1 100.6228293 MHz
NUC1 13C
P1 9.98 usec
PLW1 52.09999847 W
SFO2 400.1316005 MHz
NUC2 1H
CPDPRG2 waltz16
PCPD2 90.00 usec
PLW2 12.60000038 W
PLW12 0.34999999 W
PLW13 0.28349999 W

F2 - Processing parameters
SI 32768
SF 100.6127690 MHz
WDW EM
SSB 0
LB 1.00 Hz
GB 0
PC 1.40
```

**(Z)-N-(1-(dimethylamino)-3-oxo-1,3-diphenylprop-1-en-2-yl)-4-(trifluoromethyl)benzenesulfonamide (3aa):**

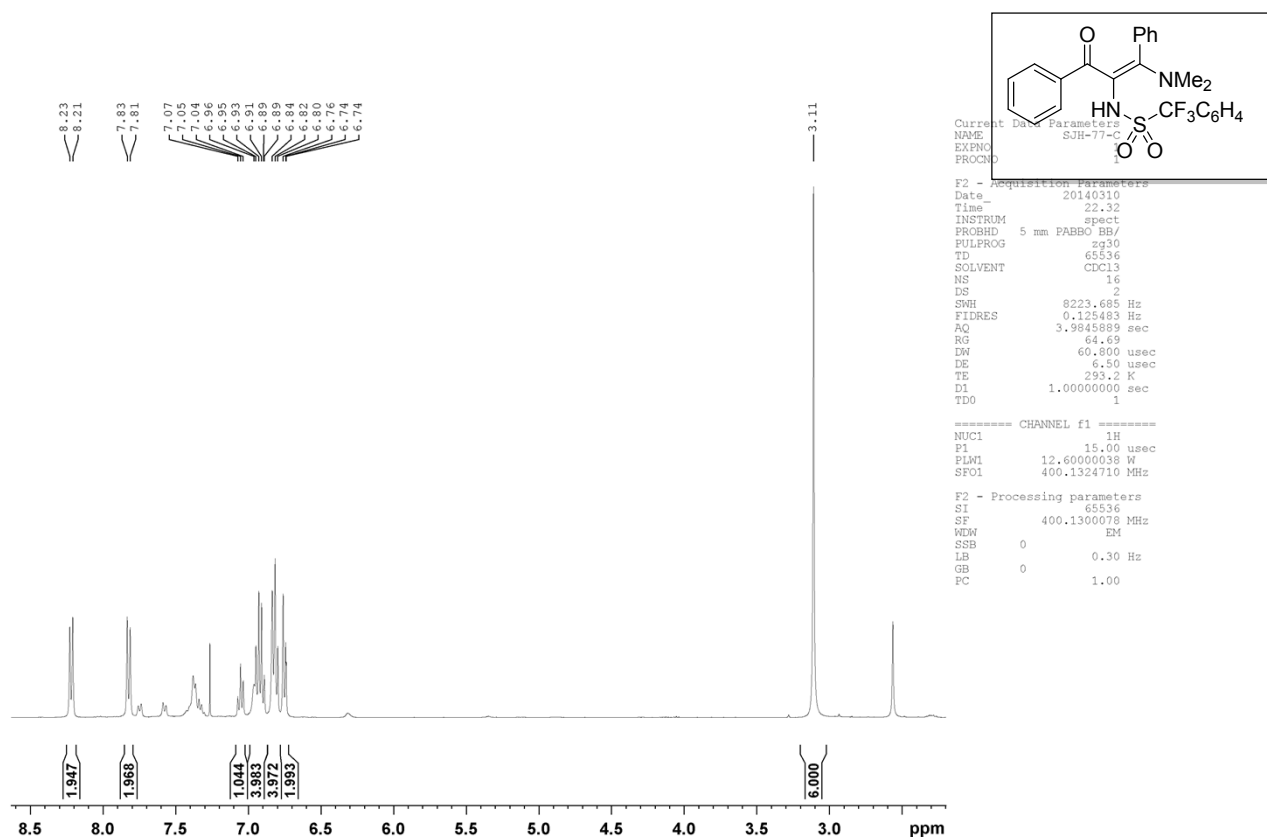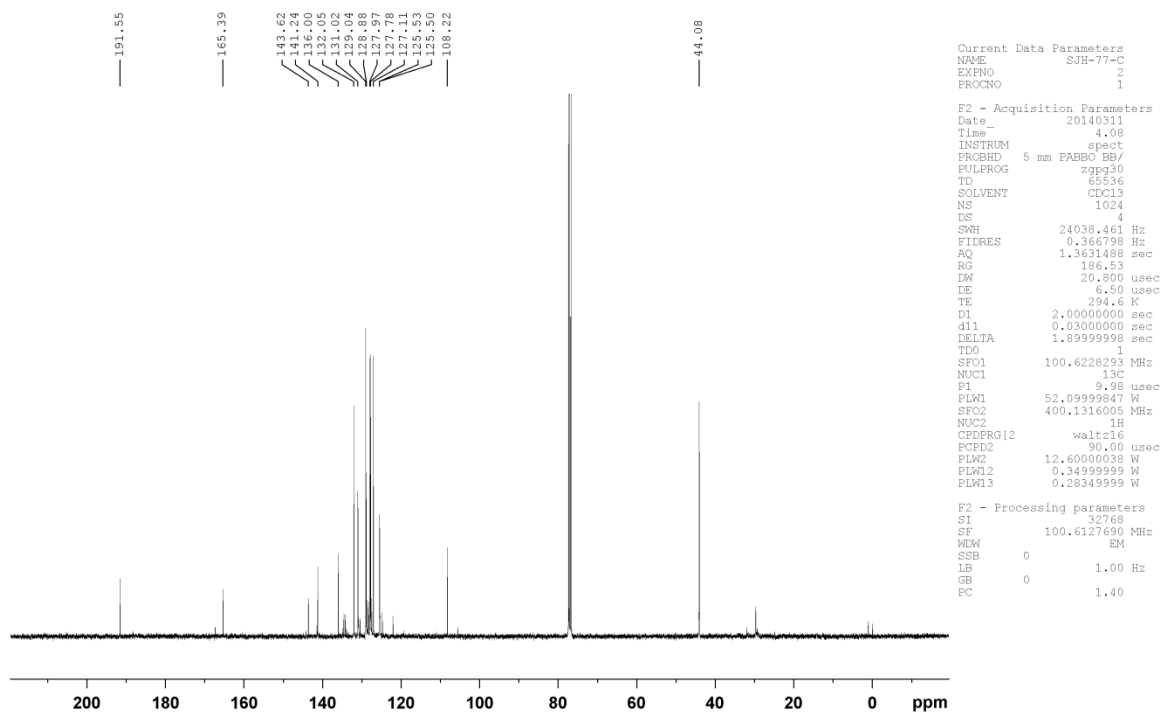

**(Z)-N-(1-(dimethylamino)-3-oxo-1,3-diphenylprop-1-en-2-yl)-4-methoxybenzenesulfonamide (3ab):**

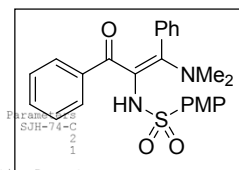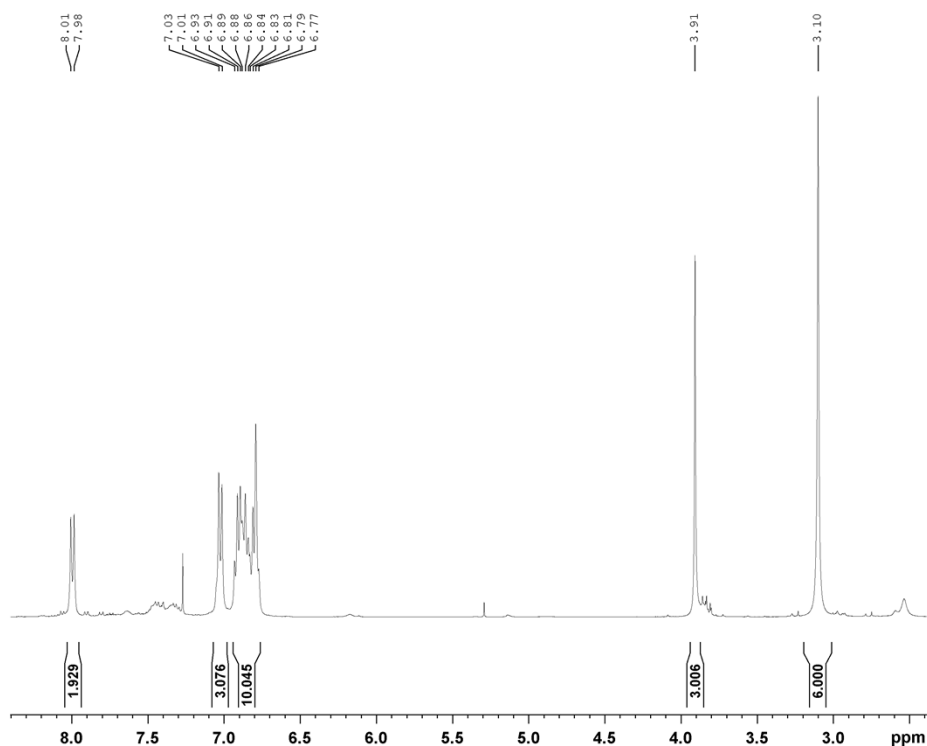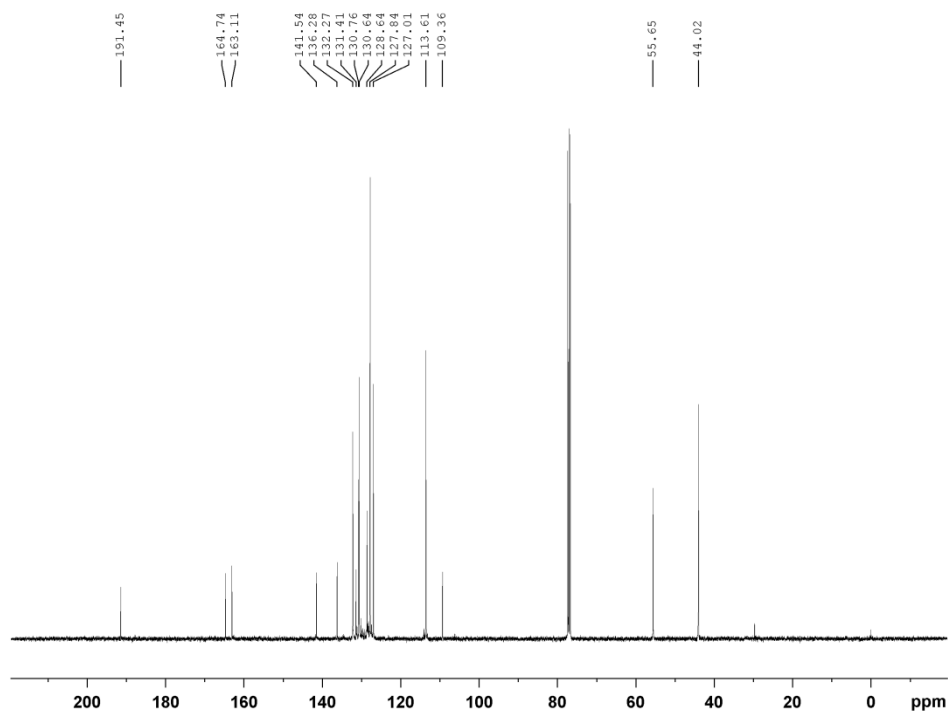

**(Z)-N-(1-(dimethylamino)-3-oxo-1,3-diphenylprop-1-en-2-yl)butane-1-sulfonamide (3ac):**

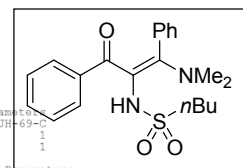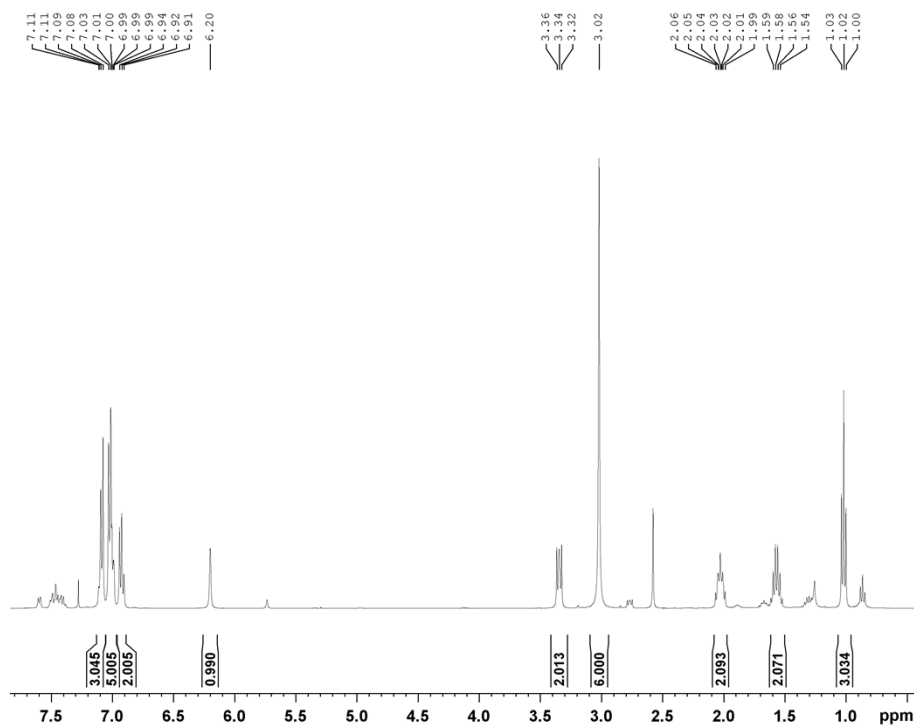

Current Data Parameters  
 Name SJH-69-C  
 ExpNO 1  
 ProcNO 1

F2 - Acquisition Parameters  
 Date 20140304  
 Time 22.44  
 INSTRUM spect  
 PROBHD 5 mm PABBO BB/  
 PULPROG zgpg30  
 TD 65536  
 SOLVENT CDCl3  
 NS 16  
 DS 2  
 SWH 8223.685 Hz  
 FIDRES 0.125483 Hz  
 AQ 3.9845989 sec  
 RG 32.47  
 DW 60.800 usec  
 DE 6.50 usec  
 TE 295.0 K  
 D1 1.00000000 sec  
 TDO 1

===== CHANNEL f1 =====  
 NUC1 1H  
 P1 15.00 usec  
 PLW1 12.60000038 MHz  
 SFO1 400.1324710 MHz

F2 - Processing parameters  
 SI 65536  
 SF 400.1300030 MHz  
 WEW EM  
 SSB 0  
 LB 0.30 Hz  
 GB 0  
 PC 1.00

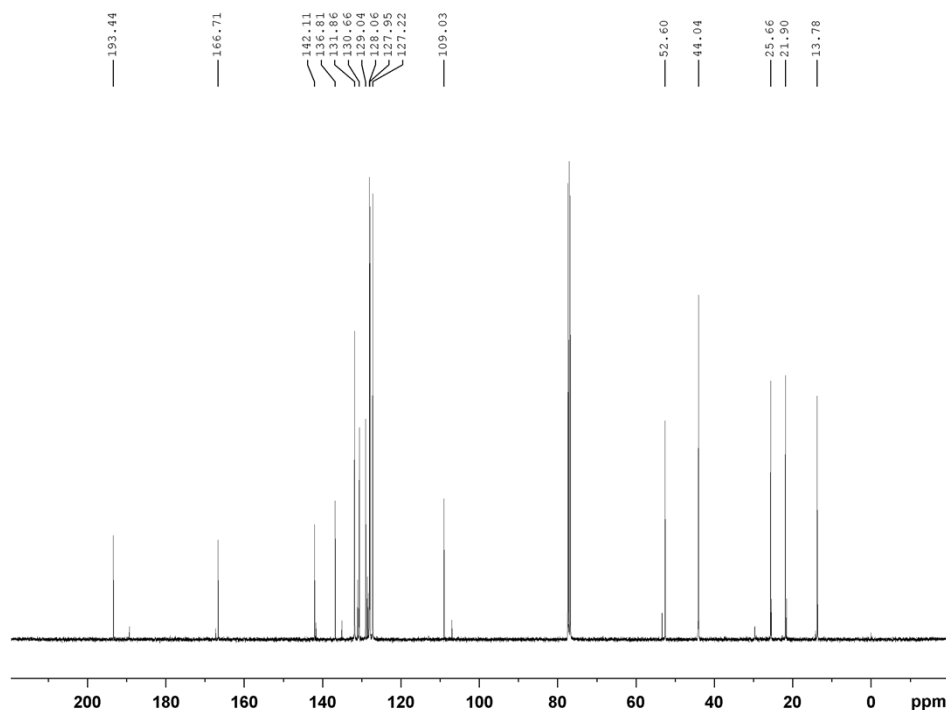

Current Data Parameters  
 Name SJH-69-C  
 ExpNO 2  
 ProcNO 1

F2 - Acquisition Parameters  
 Date 20140305  
 Time 3.01  
 INSTRUM spect  
 PROBHD 5 mm PABBO BB/  
 PULPROG zgpg30  
 TD 65536  
 SOLVENT CDCl3  
 NS 1024  
 DS 4  
 SWH 24038.461 Hz  
 FIDRES 0.366798 Hz  
 AQ 1.3631488 sec  
 RG 186.53  
 DW 20.800 usec  
 DE 6.50 usec  
 TE 293.9 K  
 D1 2.00000000 sec  
 d11 0.03000000 sec  
 DELTA 1.89999999 sec  
 TDO 1  
 SFO1 100.6228293 MHz  
 NUC1 13C  
 P1 9.98 usec  
 PLW1 52.09999847 MHz  
 SFO2 400.1316005 MHz  
 NUC2 1H  
 CPDPRG12 waltz16  
 PCPD2 90.00 usec  
 PLW2 12.60000038 W  
 PLW12 0.34999999 W  
 PLW13 0.28349999 W

F2 - Processing parameters  
 SI 32768  
 SF 100.6127690 MHz  
 WEW EM  
 SSB 0  
 LB 1.00 Hz  
 GB 0  
 PC 1.40

**(Z)-4-methyl-N-(3-oxo-1,3-diphenylprop-1-en-2-yl)benzenesulfonamide (4a):**

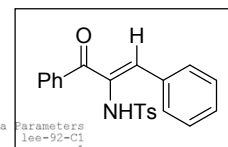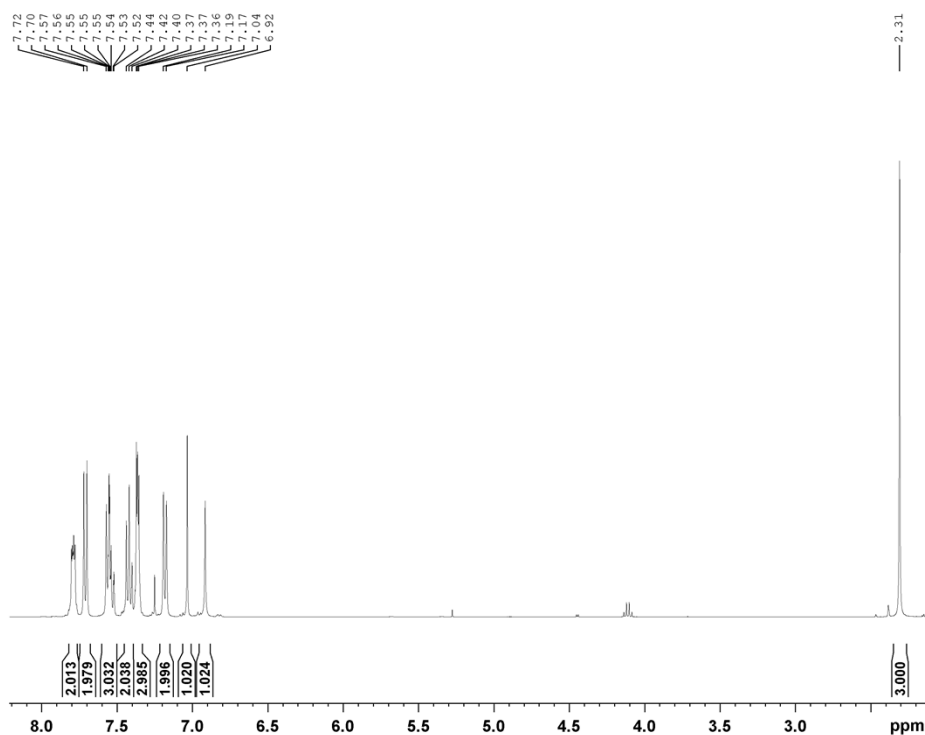

Current Data Parameters  
 NAME lee-92-C1  
 EXPNO 1  
 PROCNO 1

F2 - Acquisition Parameters  
 Date\_ 20140305  
 Time 19.22  
 INSTRUM spect  
 PROBHD 5 mm PABBO BB/  
 PULPROG zg30  
 TD 65536  
 SOLVENT CDCl3  
 NS 8  
 DS 2  
 SWH 8223.685 Hz  
 FIDRES 0.125483 Hz  
 AQ 3.9845889 sec  
 RG 54.15  
 DW 60.800 usec  
 DE 6.50 usec  
 TE 293.3 K  
 D1 1.0000000 sec  
 TDO 1

==== CHANNEL f1 =====  
 NUC1 1H  
 P1 15.00 usec  
 PLW1 12.6000038 W  
 SFO1 400.1324710 MHz

F2 - Processing parameters  
 SI 65536  
 SF 400.1300130 MHz  
 MDW EM  
 SSB 0  
 LB 0.30 Hz  
 GB 0  
 PC 1.00

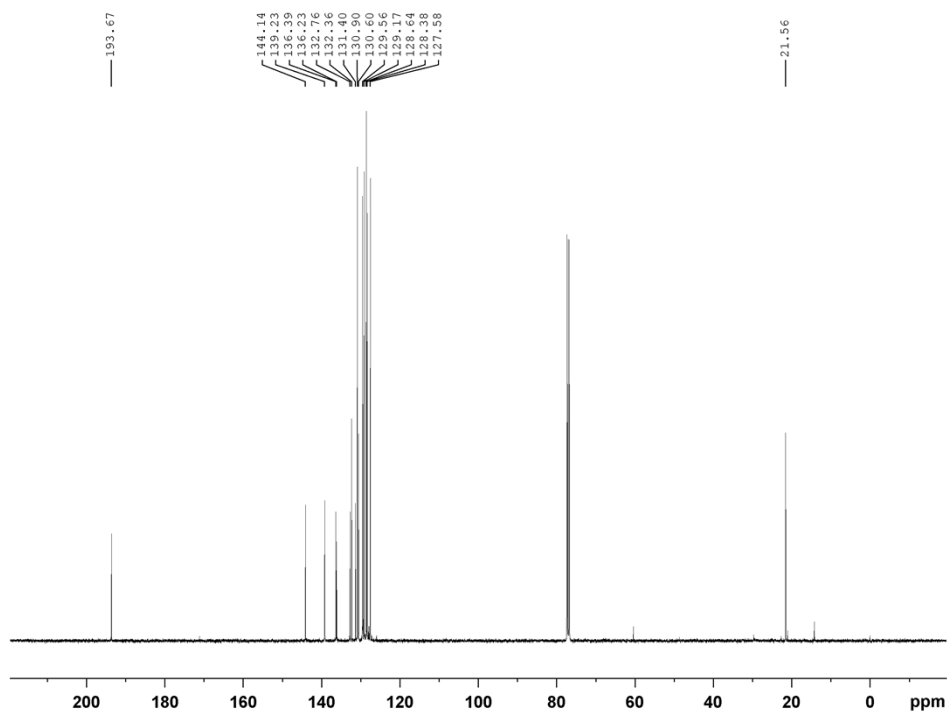

Current Data Parameters  
 NAME lee-92-C1  
 EXPNO 2  
 PROCNO 1

F2 - Acquisition Parameters  
 Date\_ 20140306  
 Time 1.01  
 INSTRUM spect  
 PROBHD 5 mm PABBO BB/  
 PULPROG zgpg30  
 TD 65536  
 SOLVENT CDCl3  
 NS 1024  
 DS 4  
 SWH 24039.461 Hz  
 FIDRES 0.366798 Hz  
 AQ 1.3631488 sec  
 RG 186.53  
 DW 20.800 usec  
 DE 6.50 usec  
 TE 294.7 K  
 D1 2.0000000 sec  
 d11 0.0300000 sec  
 DELTA 1.8999999 sec  
 TDO 1  
 SFO1 100.6228293 MHz  
 NUC1 13C  
 P1 9.98 usec  
 PLW1 52.09999847 W  
 SFO2 400.1316005 MHz  
 NUC2 1H  
 CPDPRG2 waltz16  
 PCPD2 90.00 usec  
 PLW2 12.6000038 W  
 PLW12 0.34999999 W  
 PLW13 0.28349999 W

F2 - Processing parameters  
 SI 32768  
 SF 100.6127690 MHz  
 WDW EM  
 SSB 0  
 LB 1.00 Hz  
 GB 0  
 PC 1.40

**(Z)-N-(1-(4-(tert-butyl)phenyl)-3-oxo-3-phenylprop-1-en-2-yl)-4-methylbenzenesulfonamide (4b):**

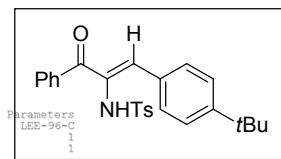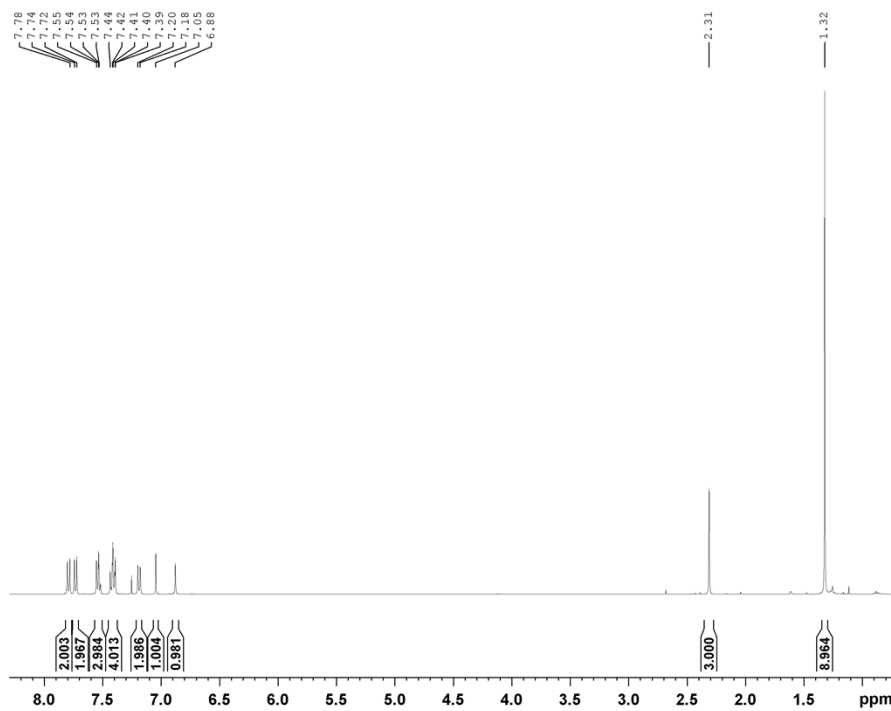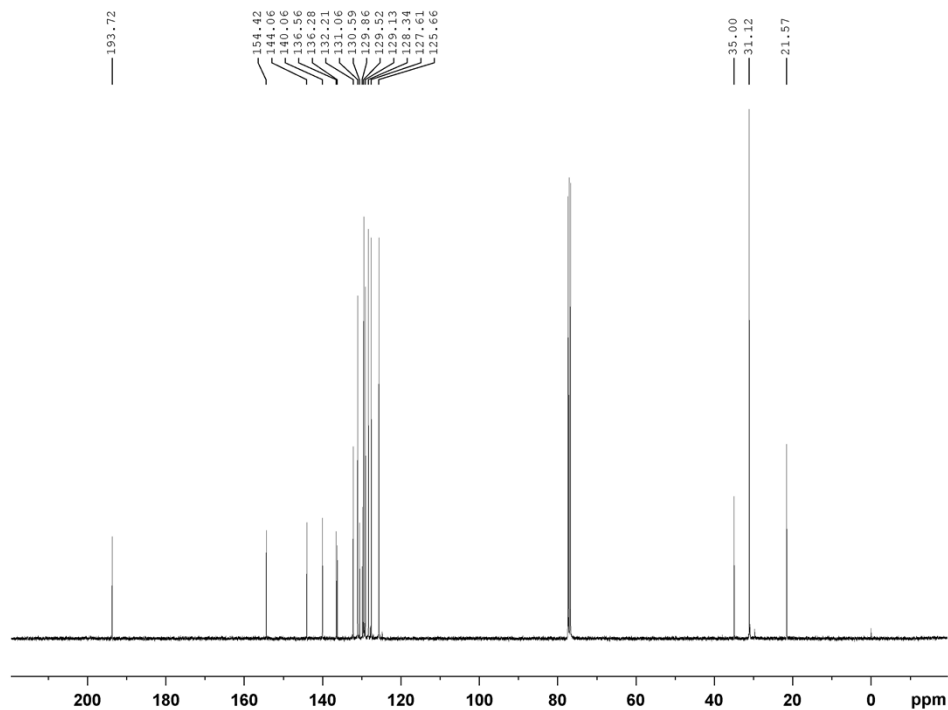

**(Z)-4-methyl-N-(1-(4-nitrophenyl)-3-oxo-3-phenylprop-1-en-2-yl)benzenesulfonamide (4c):**

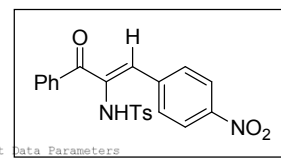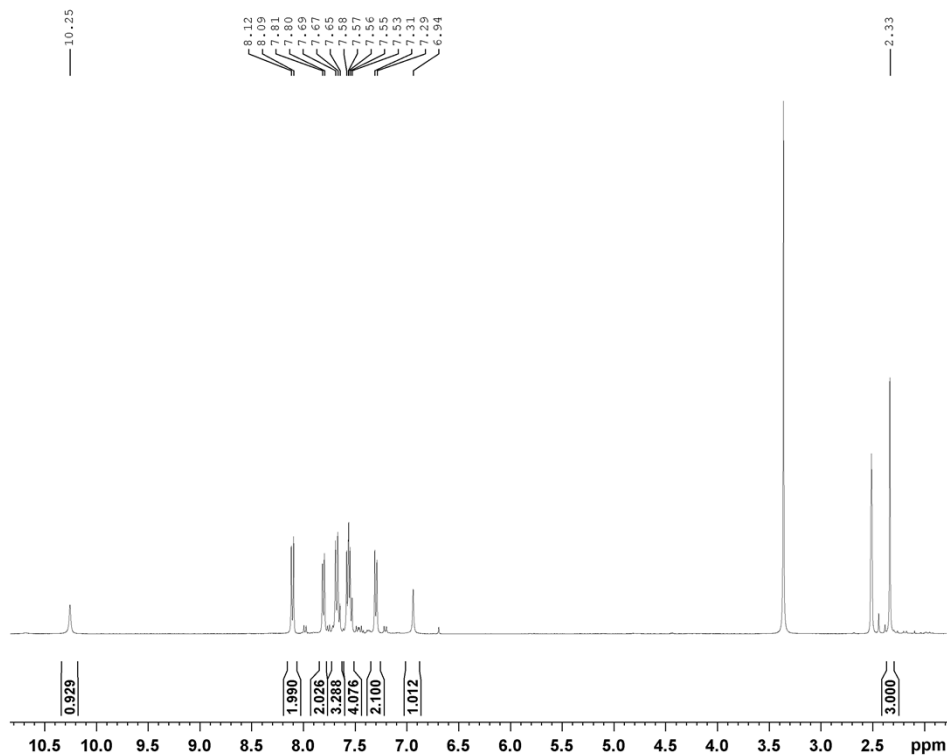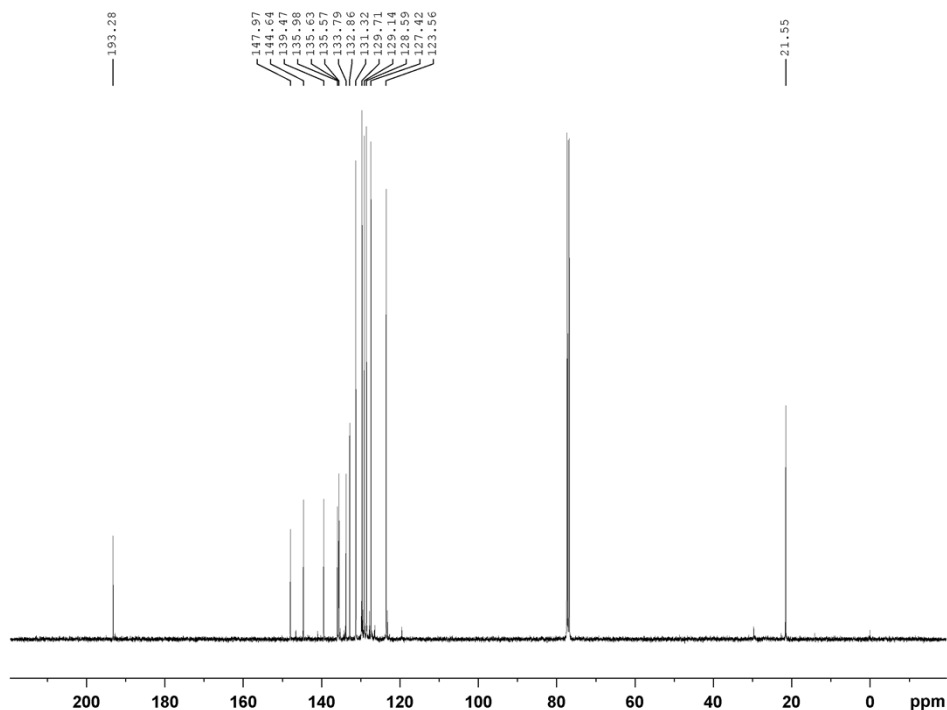

**(Z)-N-(1-(4-fluorophenyl)-3-oxo-3-phenylprop-1-en-2-yl)-4-methylbenzenesulfonamide (4d):**

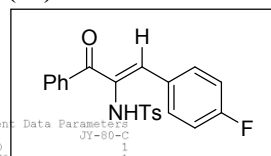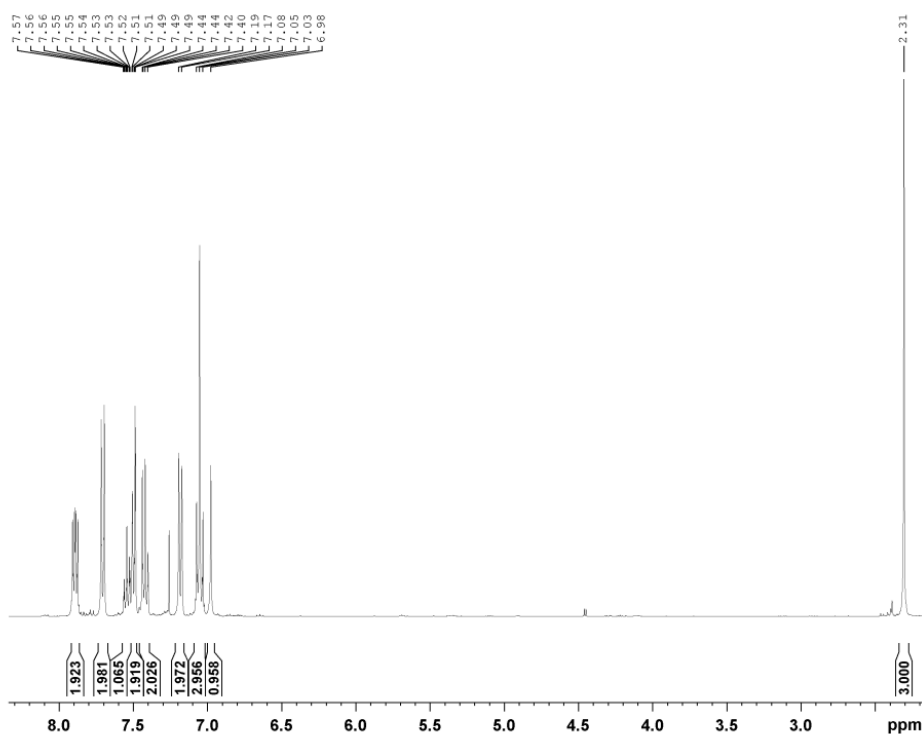

```

Current Data Parameters
NAME      JY-80-C
EXPNO    1
PROCNO   1

F2 - Acquisition Parameters
Date_    20140319
Time     22.41
INSTRUM  spect
PROBHD   5 mm PABBO BB/
PULPROG  zgpg30
TD       65536
SOLVENT  CDCl3
NS       16
DS       2
SWH      8223.685 Hz
FIDRES   0.125483 Hz
AQ       3.984589 sec
RG       64.69
DM       60.800 usec
DE       6.50 usec
TE       293.2 K
D1       1.00000000 sec
TDO      1

===== CHANNEL f1 =====
NUC1     1H
P1       15.00 usec
PLW1    12.60000038 W
SFO1    400.1324710 MHz

F2 - Processing parameters
SI       65536
SF       400.1300098 MHz
WDW      EM
SSB      0
LB       0.30 Hz
GB       0
PC       1.00
    
```

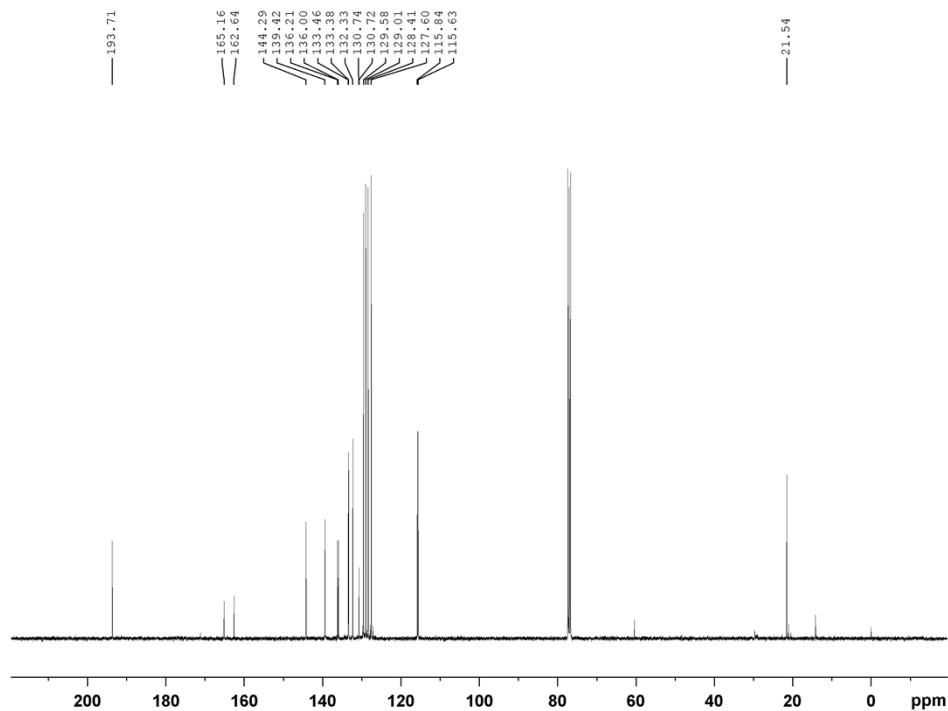

```

Current Data Parameters
NAME      JY-80-C
EXPNO    1
PROCNO   1

F2 - Acquisition Parameters
Date_    20140311
Time     7.01
INSTRUM  spect
PROBHD   5 mm PABBO BB/
PULPROG  zgpg30
TD       65536
SOLVENT  CDCl3
NS       1024
DS       4
SWH      24038.461 Hz
FIDRES   0.366798 Hz
AQ       1.3631488 sec
RG       186.53
DM       20.600 usec
DE       6.50 usec
TE       294.6 K
D1       2.00000000 sec
d11      0.03000000 sec
DELTA    1.89999998 sec
TDO      1
SFO1    100.6228293 MHz
NUC1    13C
P1       9.98 usec
PLW1    52.09999847 W
SFO2    400.1316005 MHz
NUC2    1H
CPDPRG2  waltz16
PCPD2   90.00 usec
PLW2    12.60000038 W
PLW3    0.34999999 W
PLW13   0.28349999 W

F2 - Processing parameters
SI       32768
SF       100.6127690 MHz
WDW      EM
SSB      0
LB       1.00 Hz
GB       0
PC       1.40
    
```



**(Z)-N-(1-(3-chlorophenyl)-3-oxo-3-phenylprop-1-en-2-yl)-4-methylbenzenesulfonamide (4e):**

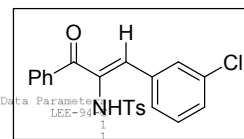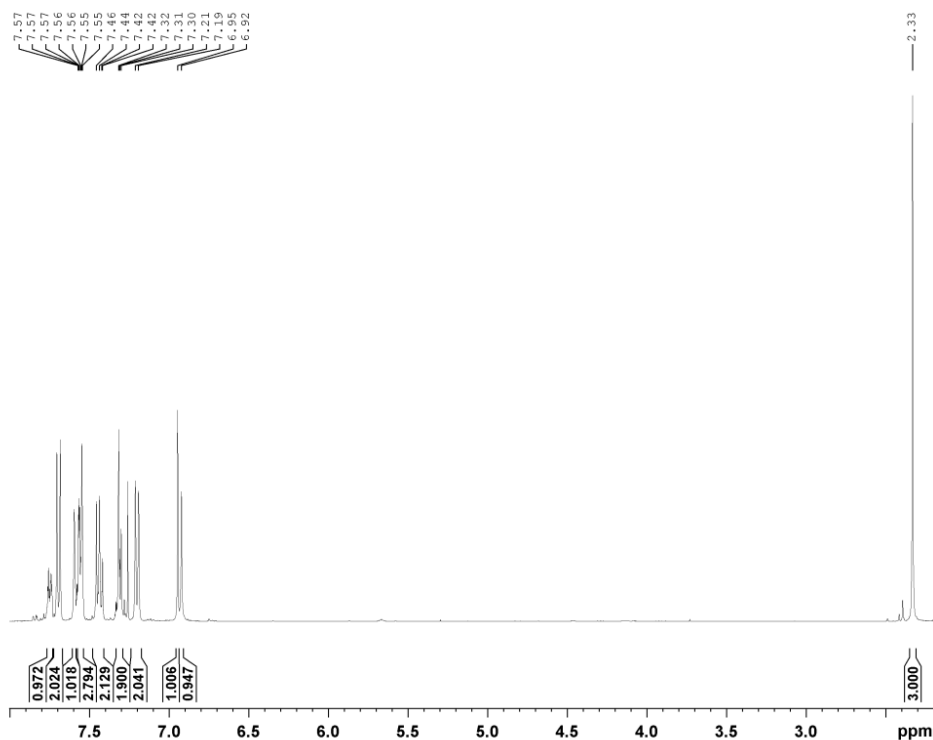

Current Data Parameters  
 NAME LEE-94-C  
 EXPNO 2  
 PROCNO 1

F2 - Acquisition Parameters  
 Date\_ 20140311  
 Time 23.13  
 INSTRUM spect  
 PROBHD 5 mm PABBO BB/  
 PULPROG zgpg30  
 TD 65536  
 SOLVENT CDCl3  
 NS 16  
 DS 2  
 SWH 8223.685 Hz  
 FIDRES 0.125483 Hz  
 AQ 3.984389 sec  
 RG 87.66  
 DW 60.800 usec  
 DE 6.50 usec  
 TE 293.0 K  
 D1 1.0000000 sec  
 TDO 1

===== CHANNEL f1 =====  
 NUC1 1H  
 P1 15.00 usec  
 PLW1 12.6000038 W  
 SFO1 400.1324710 MHz

F2 - Processing parameters  
 SI 65536  
 SF 400.1300094 MHz  
 WDW EM  
 SSB 0  
 LB 0.30 Hz  
 GB 0  
 PC 1.00

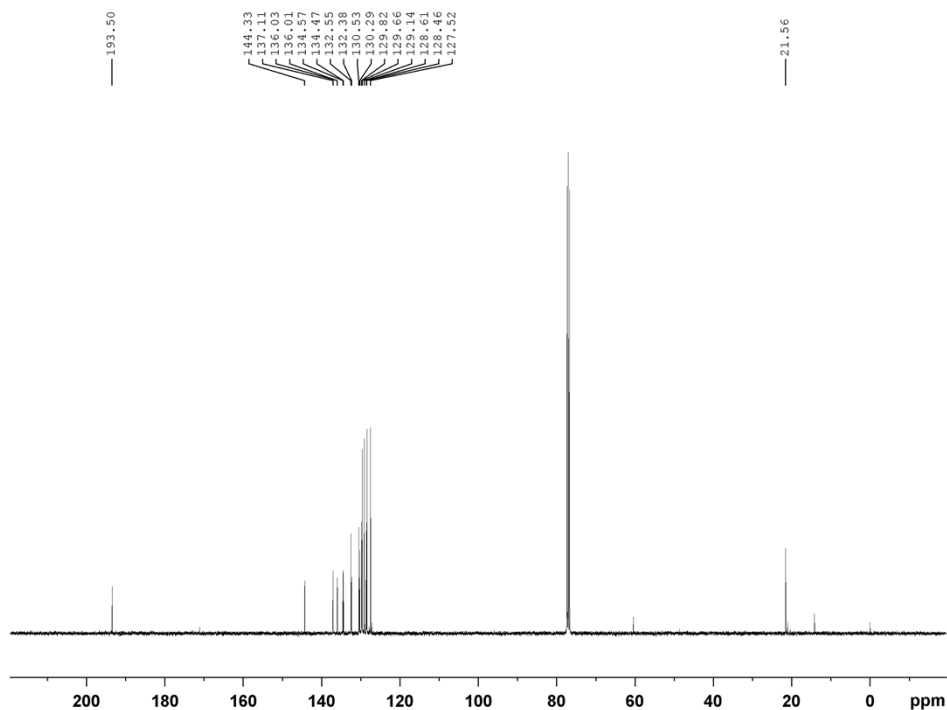

Current Data Parameters  
 NAME LEE-94-C  
 EXPNO 2  
 PROCNO 1

F2 - Acquisition Parameters  
 Date\_ 20140312  
 Time 8.01  
 INSTRUM spect  
 PROBHD 5 mm PABBO BB/  
 PULPROG zgpg30  
 TD 65536  
 SOLVENT CDCl3  
 NS 1024  
 DS 4  
 SWH 24038.461 Hz  
 FIDRES 0.366798 Hz  
 AQ 1.3631488 sec  
 RG 186.53  
 DW 20.800 usec  
 DE 6.50 usec  
 TE 294.5 K  
 D1 2.0000000 sec  
 d11 0.0300000 sec  
 DELTA 1.8999998 sec  
 TDO 1  
 SFO1 100.6228293 MHz  
 NUC1 13C  
 P1 9.98 usec  
 PLW1 52.09999847 W  
 SFO2 400.1316005 MHz  
 NUC2 1H  
 CDPORG2 waltz16  
 PCPD2 90.00 usec  
 PLW2 12.6000038 W  
 PLW12 0.34999999 W  
 PLW13 0.28349999 W

F2 - Processing parameters  
 SI 32768  
 SF 100.6127690 MHz  
 WDW EM  
 SSB 0  
 LB 1.00 Hz  
 GB 0  
 PC 1.40

O Y  
0

NOMOVE FORCED

Prob = 50  
Temp = 200

PLATON-Mar 7 04:58:13 2014 - (100912)

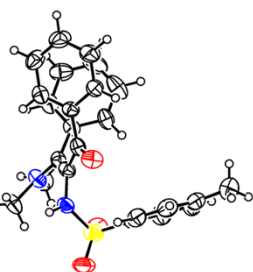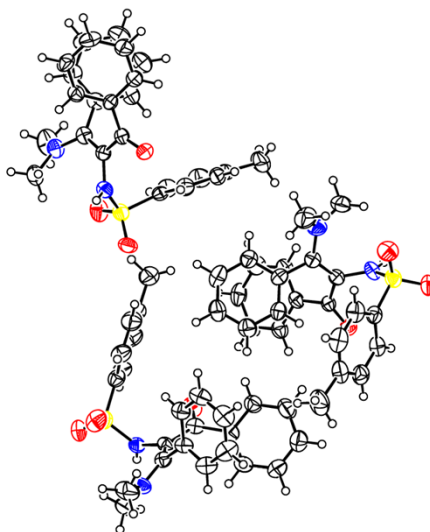

Z -98 DJL P2(1)/n R = 0.06 RES= 0 -74 X

Table 1. Crystal data and structure refinement for DJL.

|                                 |                                                                 |                   |
|---------------------------------|-----------------------------------------------------------------|-------------------|
| Identification code             | DJL                                                             |                   |
| Empirical formula               | C <sub>24</sub> H <sub>24</sub> N <sub>2</sub> O <sub>3</sub> S |                   |
| Formula weight                  | 420.51                                                          |                   |
| Temperature                     | 200(2) K                                                        |                   |
| Wavelength                      | 0.71073 Å                                                       |                   |
| Crystal system                  | Monoclinic                                                      |                   |
| Space group                     | P2(1)/n                                                         |                   |
| Unit cell dimensions            | a = 24.1033(9) Å                                                | α = 90°.          |
|                                 | b = 13.6845(5) Å                                                | β = 94.8790(10)°. |
|                                 | c = 26.7566(9) Å                                                | γ = 90°.          |
| Volume                          | 8793.5(5) Å <sup>3</sup>                                        |                   |
| Z                               | 16                                                              |                   |
| Density (calculated)            | 1.271 Mg/m <sup>3</sup>                                         |                   |
| Absorption coefficient          | 0.175 mm <sup>-1</sup>                                          |                   |
| F(000)                          | 3552                                                            |                   |
| Crystal size                    | 0.22 x 0.12 x 0.05 mm <sup>3</sup>                              |                   |
| Theta range for data collection | 1.09 to 26.01°.                                                 |                   |
| Index ranges                    | -27 ≤ h ≤ 29, -16 ≤ k ≤ 16, -32 ≤ l ≤ 23                        |                   |
| Reflections collected           | 54302                                                           |                   |
| Independent reflections         | 17276 [R(int) = 0.1025]                                         |                   |

|                                   |                                             |
|-----------------------------------|---------------------------------------------|
| Completeness to theta = 26.01°    | 99.9 %                                      |
| Absorption correction             | None                                        |
| Refinement method                 | Full-matrix least-squares on F <sup>2</sup> |
| Data / restraints / parameters    | 17276 / 0 / 1093                            |
| Goodness-of-fit on F <sup>2</sup> | 0.867                                       |
| Final R indices [I>2sigma(I)]     | R1 = 0.0578, wR2 = 0.1149                   |
| R indices (all data)              | R1 = 0.1605, wR2 = 0.1588                   |
| Largest diff. peak and hole       | 0.300 and -0.320 e.Å <sup>-3</sup>          |

Table 2. Atomic coordinates ( $\times 10^4$ ) and equivalent isotropic displacement parameters ( $\text{\AA}^2 \times 10^3$ ) for DJL.  $U(\text{eq})$  is defined as one third of the trace of the orthogonalized  $U^{ij}$  tensor.

|       | x       | y       | z       | U(eq) |
|-------|---------|---------|---------|-------|
| C(1)  | 2865(2) | 7295(3) | 310(1)  | 40(1) |
| O(1)  | 2661(1) | 7900(2) | 587(1)  | 54(1) |
| C(2)  | 2494(2) | 6650(3) | 3(1)    | 40(1) |
| C(3)  | 2644(2) | 5801(3) | -231(1) | 40(1) |
| C(4)  | 3478(2) | 7321(3) | 284(2)  | 39(1) |
| C(5)  | 3740(2) | 7228(3) | -155(2) | 45(1) |
| C(6)  | 4308(2) | 7293(3) | -151(2) | 57(1) |
| C(7)  | 4626(2) | 7449(4) | 290(2)  | 68(2) |
| C(8)  | 4371(2) | 7568(4) | 727(2)  | 67(2) |
| C(9)  | 3805(2) | 7517(3) | 722(2)  | 48(1) |
| N(1)  | 1923(1) | 6975(2) | -44(1)  | 44(1) |
| S(1)  | 1443(1) | 6407(1) | 235(1)  | 53(1) |
| O(2)  | 1488(1) | 5380(2) | 135(1)  | 65(1) |
| O(3)  | 936(1)  | 6914(2) | 94(1)   | 68(1) |
| C(10) | 1608(2) | 6566(3) | 885(2)  | 49(1) |
| C(11) | 1671(2) | 5777(3) | 1204(2) | 61(1) |
| C(12) | 1803(2) | 5933(4) | 1710(2) | 66(1) |
| C(13) | 1879(2) | 6856(4) | 1907(2) | 60(1) |
| C(14) | 1807(2) | 7644(3) | 1583(2) | 57(1) |
| C(15) | 1673(2) | 7510(3) | 1078(2) | 52(1) |
| C(16) | 2055(2) | 7010(4) | 2457(2) | 81(2) |
| N(2)  | 2354(1) | 5421(2) | -641(1) | 47(1) |
| C(17) | 2301(2) | 4367(3) | -721(2) | 61(1) |
| C(18) | 1972(2) | 6009(3) | -973(2) | 60(1) |
| C(19) | 3149(2) | 5249(3) | -42(2)  | 38(1) |
| C(20) | 3546(2) | 4983(3) | -360(2) | 50(1) |
| C(21) | 4044(2) | 4574(3) | -179(2) | 62(1) |
| C(22) | 4149(2) | 4420(3) | 322(2)  | 70(2) |
| C(23) | 3756(2) | 4649(3) | 640(2)  | 68(2) |
| C(24) | 3254(2) | 5061(3) | 465(2)  | 49(1) |
| C(25) | 5151(2) | 3474(3) | 7768(1) | 35(1) |
| O(4)  | 4888(1) | 3751(2) | 8122(1) | 41(1) |

|       |         |          |          |       |
|-------|---------|----------|----------|-------|
| C(26) | 4886(2) | 2880(3)  | 7366(1)  | 35(1) |
| C(27) | 5175(2) | 2334(3)  | 7035(2)  | 41(1) |
| C(28) | 5721(2) | 3870(3)  | 7727(1)  | 34(1) |
| C(29) | 5891(2) | 4206(3)  | 7275(2)  | 42(1) |
| C(30) | 6408(2) | 4625(3)  | 7248(2)  | 52(1) |
| C(31) | 6767(2) | 4692(3)  | 7672(2)  | 58(1) |
| C(32) | 6603(2) | 4367(4)  | 8124(2)  | 62(1) |
| C(33) | 6082(2) | 3970(3)  | 8152(2)  | 52(1) |
| N(3)  | 4290(1) | 2942(2)  | 7318(1)  | 40(1) |
| S(2)  | 3894(1) | 1998(1)  | 7375(1)  | 43(1) |
| O(5)  | 3932(1) | 1357(2)  | 6957(1)  | 59(1) |
| O(6)  | 3360(1) | 2390(2)  | 7468(1)  | 52(1) |
| C(34) | 4157(2) | 1341(3)  | 7912(1)  | 36(1) |
| C(35) | 4250(2) | 1801(3)  | 8372(2)  | 47(1) |
| C(36) | 4388(2) | 1244(4)  | 8797(2)  | 54(1) |
| C(37) | 4431(2) | 247(4)   | 8777(2)  | 58(1) |
| C(38) | 4351(2) | -201(3)  | 8314(2)  | 64(1) |
| C(39) | 4218(2) | 337(3)   | 7881(2)  | 52(1) |
| C(40) | 4557(2) | -355(4)  | 9245(2)  | 92(2) |
| N(4)  | 4983(1) | 2156(2)  | 6551(1)  | 47(1) |
| C(41) | 5072(2) | 1217(3)  | 6310(2)  | 80(2) |
| C(42) | 4578(2) | 2797(3)  | 6279(2)  | 58(1) |
| C(43) | 5713(2) | 1894(3)  | 7220(2)  | 42(1) |
| C(44) | 6175(2) | 1950(3)  | 6938(2)  | 53(1) |
| C(45) | 6685(2) | 1615(3)  | 7137(2)  | 65(1) |
| C(46) | 6742(2) | 1203(3)  | 7609(2)  | 64(1) |
| C(47) | 6290(2) | 1122(3)  | 7886(2)  | 58(1) |
| C(48) | 5779(2) | 1462(3)  | 7695(2)  | 48(1) |
| C(49) | 2205(2) | -448(3)  | 9954(1)  | 35(1) |
| O(7)  | 1801(1) | -766(2)  | 10157(1) | 45(1) |
| C(50) | 2636(2) | 146(3)   | 10219(1) | 37(1) |
| C(51) | 2952(2) | 826(3)   | 9994(1)  | 40(1) |
| C(52) | 2286(2) | -771(3)  | 9430(1)  | 37(1) |
| C(53) | 2807(2) | -1003(3) | 9285(2)  | 45(1) |
| C(54) | 2868(2) | -1354(3) | 8810(2)  | 57(1) |
| C(55) | 2406(2) | -1468(3) | 8470(2)  | 58(1) |
| C(56) | 1883(2) | -1244(3) | 8614(2)  | 58(1) |

|       |         |         |          |       |
|-------|---------|---------|----------|-------|
| C(57) | 1817(2) | -918(3) | 9096(1)  | 45(1) |
| N(5)  | 2707(1) | -42(2)  | 10745(1) | 42(1) |
| S(3)  | 2581(1) | 774(1)  | 11162(1) | 47(1) |
| O(8)  | 3037(1) | 1439(2) | 11235(1) | 60(1) |
| O(9)  | 2432(1) | 219(2)  | 11586(1) | 58(1) |
| C(58) | 2017(2) | 1466(3) | 10898(1) | 43(1) |
| C(59) | 2100(2) | 2420(3) | 10761(2) | 58(1) |
| C(60) | 1661(2) | 2943(3) | 10523(2) | 64(1) |
| C(61) | 1139(2) | 2518(3) | 10419(2) | 58(1) |
| C(62) | 1061(2) | 1568(3) | 10584(2) | 54(1) |
| C(63) | 1500(2) | 1035(3) | 10817(1) | 47(1) |
| C(64) | 668(2)  | 3048(4) | 10118(2) | 84(2) |
| N(6)  | 3473(2) | 1102(3) | 10169(1) | 52(1) |
| C(65) | 3656(2) | 2112(3) | 10163(2) | 75(2) |
| C(66) | 3824(2) | 453(4)  | 10489(2) | 68(2) |
| C(67) | 2706(2) | 1291(3) | 9525(2)  | 40(1) |
| C(68) | 3022(2) | 1390(3) | 9117(2)  | 53(1) |
| C(69) | 2775(2) | 1753(3) | 8669(2)  | 63(1) |
| C(70) | 2224(2) | 2035(3) | 8627(2)  | 60(1) |
| C(71) | 1917(2) | 1962(3) | 9032(2)  | 52(1) |
| C(72) | 2158(2) | 1594(3) | 9481(2)  | 43(1) |
| C(73) | 350(2)  | 728(3)  | 7857(2)  | 39(1) |
| O(10) | 651(1)  | 30(2)   | 7756(1)  | 50(1) |
| C(74) | 82(2)   | 1322(3) | 7458(1)  | 38(1) |
| C(75) | -142(2) | 2241(3) | 7524(1)  | 40(1) |
| C(76) | 225(2)  | 823(3)  | 8396(2)  | 39(1) |
| C(77) | -305(2) | 986(3)  | 8542(2)  | 44(1) |
| C(78) | -403(2) | 993(3)  | 9042(2)  | 54(1) |
| C(79) | 24(2)   | 850(3)  | 9404(2)  | 62(1) |
| C(80) | 555(2)  | 681(4)  | 9270(2)  | 65(1) |
| C(81) | 657(2)  | 658(3)  | 8767(2)  | 50(1) |
| N(7)  | 92(1)   | 921(2)  | 6965(1)  | 40(1) |
| S(4)  | 533(1)  | 1313(1) | 6585(1)  | 49(1) |
| O(11) | 543(1)  | 2358(2) | 6615(1)  | 64(1) |
| O(12) | 372(1)  | 851(2)  | 6111(1)  | 61(1) |
| C(82) | 1191(2) | 874(3)  | 6795(2)  | 45(1) |
| C(83) | 1596(2) | 1496(3) | 7009(2)  | 58(1) |

|       |         |         |         |       |
|-------|---------|---------|---------|-------|
| C(84) | 2109(2) | 1128(4) | 7179(2) | 63(1) |
| C(85) | 2233(2) | 142(4)  | 7146(2) | 55(1) |
| C(86) | 1820(2) | -472(3) | 6925(2) | 58(1) |
| C(87) | 1303(2) | -104(3) | 6754(2) | 50(1) |
| C(88) | 2802(2) | -255(4) | 7336(2) | 77(2) |
| N(8)  | -542(1) | 2651(2) | 7205(1) | 48(1) |
| C(89) | -596(2) | 3702(3) | 7131(2) | 73(2) |
| C(90) | -879(2) | 2082(3) | 6827(2) | 60(1) |
| C(91) | 83(2)   | 2854(3) | 7958(2) | 39(1) |
| C(92) | -257(2) | 3215(3) | 8307(2) | 52(1) |
| C(93) | -26(2)  | 3724(3) | 8720(2) | 63(1) |
| C(94) | 539(2)  | 3919(3) | 8774(2) | 61(1) |
| C(95) | 872(2)  | 3594(3) | 8418(2) | 55(1) |
| C(96) | 647(2)  | 3047(3) | 8013(2) | 48(1) |

---

Table 3. Bond lengths [Å] and angles [°] for DJL.

---

|              |          |
|--------------|----------|
| C(1)-O(1)    | 1.239(4) |
| C(1)-C(2)    | 1.459(5) |
| C(1)-C(4)    | 1.486(5) |
| C(2)-C(3)    | 1.383(5) |
| C(2)-N(1)    | 1.440(5) |
| C(3)-N(2)    | 1.354(4) |
| C(3)-C(19)   | 1.484(5) |
| C(4)-C(9)    | 1.382(5) |
| C(4)-C(5)    | 1.384(5) |
| C(5)-C(6)    | 1.371(5) |
| C(5)-H(5)    | 0.9500   |
| C(6)-C(7)    | 1.368(5) |
| C(6)-H(6)    | 0.9500   |
| C(7)-C(8)    | 1.374(6) |
| C(7)-H(7)    | 0.9500   |
| C(8)-C(9)    | 1.367(6) |
| C(8)-H(8)    | 0.9500   |
| C(9)-H(9)    | 0.9500   |
| N(1)-S(1)    | 1.629(3) |
| N(1)-H(1A)   | 0.8800   |
| S(1)-O(3)    | 1.427(3) |
| S(1)-O(2)    | 1.436(3) |
| S(1)-C(10)   | 1.764(4) |
| C(10)-C(11)  | 1.376(5) |
| C(10)-C(15)  | 1.394(5) |
| C(11)-C(12)  | 1.380(6) |
| C(11)-H(11)  | 0.9500   |
| C(12)-C(13)  | 1.376(6) |
| C(12)-H(12)  | 0.9500   |
| C(13)-C(14)  | 1.385(6) |
| C(13)-C(16)  | 1.511(6) |
| C(14)-C(15)  | 1.375(5) |
| C(14)-H(14)  | 0.9500   |
| C(15)-H(15)  | 0.9500   |
| C(16)-H(16A) | 0.9800   |



|              |          |
|--------------|----------|
| C(16)-H(16B) | 0.9800   |
| C(16)-H(16C) | 0.9800   |
| N(2)-C(17)   | 1.462(5) |
| N(2)-C(18)   | 1.465(4) |
| C(17)-H(17A) | 0.9800   |
| C(17)-H(17B) | 0.9800   |
| C(17)-H(17C) | 0.9800   |
| C(18)-H(18A) | 0.9800   |
| C(18)-H(18B) | 0.9800   |
| C(18)-H(18C) | 0.9800   |
| C(19)-C(24)  | 1.382(5) |
| C(19)-C(20)  | 1.383(6) |
| C(20)-C(21)  | 1.376(5) |
| C(20)-H(20)  | 0.9500   |
| C(21)-C(22)  | 1.361(6) |
| C(21)-H(21)  | 0.9500   |
| C(22)-C(23)  | 1.363(7) |
| C(22)-H(22)  | 0.9500   |
| C(23)-C(24)  | 1.380(6) |
| C(23)-H(23)  | 0.9500   |
| C(24)-H(24)  | 0.9500   |
| C(25)-O(4)   | 1.242(4) |
| C(25)-C(26)  | 1.451(5) |
| C(25)-C(28)  | 1.491(5) |
| C(26)-C(27)  | 1.391(5) |
| C(26)-N(3)   | 1.433(5) |
| C(27)-N(4)   | 1.358(4) |
| C(27)-C(43)  | 1.477(5) |
| C(28)-C(33)  | 1.379(5) |
| C(28)-C(29)  | 1.388(5) |
| C(29)-C(30)  | 1.378(5) |
| C(29)-H(29)  | 0.9500   |
| C(30)-C(31)  | 1.372(5) |
| C(30)-H(30)  | 0.9500   |
| C(31)-C(32)  | 1.376(6) |
| C(31)-H(31)  | 0.9500   |
| C(32)-C(33)  | 1.375(6) |

|              |          |
|--------------|----------|
| C(32)-H(32)  | 0.9500   |
| C(33)-H(33)  | 0.9500   |
| N(3)-S(2)    | 1.622(3) |
| N(3)-H(3A)   | 0.8800   |
| S(2)-O(5)    | 1.429(3) |
| S(2)-O(6)    | 1.435(3) |
| S(2)-C(34)   | 1.767(4) |
| C(34)-C(35)  | 1.383(5) |
| C(34)-C(39)  | 1.384(5) |
| C(35)-C(36)  | 1.387(5) |
| C(35)-H(35)  | 0.9500   |
| C(36)-C(37)  | 1.370(6) |
| C(36)-H(36)  | 0.9500   |
| C(37)-C(38)  | 1.381(6) |
| C(37)-C(40)  | 1.509(6) |
| C(38)-C(39)  | 1.386(5) |
| C(38)-H(38)  | 0.9500   |
| C(39)-H(39)  | 0.9500   |
| C(40)-H(40A) | 0.9800   |
| C(40)-H(40B) | 0.9800   |
| C(40)-H(40C) | 0.9800   |
| N(4)-C(42)   | 1.459(5) |
| N(4)-C(41)   | 1.464(5) |
| C(41)-H(41A) | 0.9800   |
| C(41)-H(41B) | 0.9800   |
| C(41)-H(41C) | 0.9800   |
| C(42)-H(42A) | 0.9800   |
| C(42)-H(42B) | 0.9800   |
| C(42)-H(42C) | 0.9800   |
| C(43)-C(44)  | 1.399(6) |
| C(43)-C(48)  | 1.399(5) |
| C(44)-C(45)  | 1.377(5) |
| C(44)-H(44)  | 0.9500   |
| C(45)-C(46)  | 1.379(6) |
| C(45)-H(45)  | 0.9500   |
| C(46)-C(47)  | 1.376(6) |
| C(46)-H(46)  | 0.9500   |

|             |          |
|-------------|----------|
| C(47)-C(48) | 1.375(5) |
| C(47)-H(47) | 0.9500   |
| C(48)-H(48) | 0.9500   |
| C(49)-O(7)  | 1.234(4) |
| C(49)-C(50) | 1.453(5) |
| C(49)-C(52) | 1.497(5) |
| C(50)-C(51) | 1.373(5) |
| C(50)-N(5)  | 1.427(4) |
| C(51)-N(6)  | 1.355(5) |
| C(51)-C(67) | 1.484(5) |
| C(52)-C(53) | 1.383(5) |
| C(52)-C(57) | 1.394(5) |
| C(53)-C(54) | 1.378(5) |
| C(53)-H(53) | 0.9500   |
| C(54)-C(55) | 1.384(5) |
| C(54)-H(54) | 0.9500   |
| C(55)-C(56) | 1.383(6) |
| C(55)-H(55) | 0.9500   |
| C(56)-C(57) | 1.385(6) |
| C(56)-H(56) | 0.9500   |
| C(57)-H(57) | 0.9500   |
| N(5)-S(3)   | 1.626(3) |
| N(5)-H(5A)  | 0.8800   |
| S(3)-O(8)   | 1.427(3) |
| S(3)-O(9)   | 1.437(3) |
| S(3)-C(58)  | 1.757(4) |
| C(58)-C(59) | 1.375(5) |
| C(58)-C(63) | 1.378(5) |
| C(59)-C(60) | 1.386(6) |
| C(59)-H(59) | 0.9500   |
| C(60)-C(61) | 1.393(6) |
| C(60)-H(60) | 0.9500   |
| C(61)-C(62) | 1.391(6) |
| C(61)-C(64) | 1.519(6) |
| C(62)-C(63) | 1.389(5) |
| C(62)-H(62) | 0.9500   |
| C(63)-H(63) | 0.9500   |

|              |          |
|--------------|----------|
| C(64)-H(64A) | 0.9800   |
| C(64)-H(64B) | 0.9800   |
| C(64)-H(64C) | 0.9800   |
| N(6)-C(65)   | 1.452(5) |
| N(6)-C(66)   | 1.455(5) |
| C(65)-H(65A) | 0.9800   |
| C(65)-H(65B) | 0.9800   |
| C(65)-H(65C) | 0.9800   |
| C(66)-H(66A) | 0.9800   |
| C(66)-H(66B) | 0.9800   |
| C(66)-H(66C) | 0.9800   |
| C(67)-C(72)  | 1.380(5) |
| C(67)-C(68)  | 1.392(6) |
| C(68)-C(69)  | 1.383(5) |
| C(68)-H(68)  | 0.9500   |
| C(69)-C(70)  | 1.378(6) |
| C(69)-H(69)  | 0.9500   |
| C(70)-C(71)  | 1.367(6) |
| C(70)-H(70)  | 0.9500   |
| C(71)-C(72)  | 1.384(5) |
| C(71)-H(71)  | 0.9500   |
| C(72)-H(72)  | 0.9500   |
| C(73)-O(10)  | 1.242(4) |
| C(73)-C(74)  | 1.451(5) |
| C(73)-C(76)  | 1.505(5) |
| C(74)-C(75)  | 1.387(5) |
| C(74)-N(7)   | 1.429(5) |
| C(75)-N(8)   | 1.353(4) |
| C(75)-C(91)  | 1.496(5) |
| C(76)-C(77)  | 1.386(5) |
| C(76)-C(81)  | 1.394(5) |
| C(77)-C(78)  | 1.379(6) |
| C(77)-H(77)  | 0.9500   |
| C(78)-C(79)  | 1.366(5) |
| C(78)-H(78)  | 0.9500   |
| C(79)-C(80)  | 1.378(6) |
| C(79)-H(79)  | 0.9500   |

|              |          |
|--------------|----------|
| C(80)-C(81)  | 1.389(6) |
| C(80)-H(80)  | 0.9500   |
| C(81)-H(81)  | 0.9500   |
| N(7)-S(4)    | 1.624(3) |
| N(7)-H(7A)   | 0.8800   |
| S(4)-O(11)   | 1.432(3) |
| S(4)-O(12)   | 1.441(3) |
| S(4)-C(82)   | 1.742(4) |
| C(82)-C(87)  | 1.372(5) |
| C(82)-C(83)  | 1.382(5) |
| C(83)-C(84)  | 1.377(6) |
| C(83)-H(83)  | 0.9500   |
| C(84)-C(85)  | 1.387(6) |
| C(84)-H(84)  | 0.9500   |
| C(85)-C(86)  | 1.394(6) |
| C(85)-C(88)  | 1.522(6) |
| C(86)-C(87)  | 1.385(5) |
| C(86)-H(86)  | 0.9500   |
| C(87)-H(87)  | 0.9500   |
| C(88)-H(88A) | 0.9800   |
| C(88)-H(88B) | 0.9800   |
| C(88)-H(88C) | 0.9800   |
| N(8)-C(89)   | 1.457(5) |
| N(8)-C(90)   | 1.465(5) |
| C(89)-H(89A) | 0.9800   |
| C(89)-H(89B) | 0.9800   |
| C(89)-H(89C) | 0.9800   |
| C(90)-H(90A) | 0.9800   |
| C(90)-H(90B) | 0.9800   |
| C(90)-H(90C) | 0.9800   |
| C(91)-C(96)  | 1.381(5) |
| C(91)-C(92)  | 1.385(6) |
| C(92)-C(93)  | 1.382(5) |
| C(92)-H(92)  | 0.9500   |
| C(93)-C(94)  | 1.385(6) |
| C(93)-H(93)  | 0.9500   |
| C(94)-C(95)  | 1.371(6) |

|                 |            |
|-----------------|------------|
| C(94)-H(94)     | 0.9500     |
| C(95)-C(96)     | 1.387(5)   |
| C(95)-H(95)     | 0.9500     |
| C(96)-H(96)     | 0.9500     |
| O(1)-C(1)-C(2)  | 119.0(4)   |
| O(1)-C(1)-C(4)  | 117.3(4)   |
| C(2)-C(1)-C(4)  | 123.5(4)   |
| C(3)-C(2)-N(1)  | 120.3(3)   |
| C(3)-C(2)-C(1)  | 126.3(4)   |
| N(1)-C(2)-C(1)  | 113.5(3)   |
| N(2)-C(3)-C(2)  | 123.6(4)   |
| N(2)-C(3)-C(19) | 115.6(4)   |
| C(2)-C(3)-C(19) | 120.8(3)   |
| C(9)-C(4)-C(5)  | 118.0(4)   |
| C(9)-C(4)-C(1)  | 117.4(4)   |
| C(5)-C(4)-C(1)  | 124.4(4)   |
| C(6)-C(5)-C(4)  | 121.0(4)   |
| C(6)-C(5)-H(5)  | 119.5      |
| C(4)-C(5)-H(5)  | 119.5      |
| C(7)-C(6)-C(5)  | 120.1(4)   |
| C(7)-C(6)-H(6)  | 119.9      |
| C(5)-C(6)-H(6)  | 119.9      |
| C(6)-C(7)-C(8)  | 119.6(5)   |
| C(6)-C(7)-H(7)  | 120.2      |
| C(8)-C(7)-H(7)  | 120.2      |
| C(9)-C(8)-C(7)  | 120.3(4)   |
| C(9)-C(8)-H(8)  | 119.8      |
| C(7)-C(8)-H(8)  | 119.8      |
| C(8)-C(9)-C(4)  | 120.9(4)   |
| C(8)-C(9)-H(9)  | 119.6      |
| C(4)-C(9)-H(9)  | 119.6      |
| C(2)-N(1)-S(1)  | 121.5(3)   |
| C(2)-N(1)-H(1A) | 119.3      |
| S(1)-N(1)-H(1A) | 119.3      |
| O(3)-S(1)-O(2)  | 120.13(19) |
| O(3)-S(1)-N(1)  | 105.78(18) |

|                     |            |
|---------------------|------------|
| O(2)-S(1)-N(1)      | 108.23(19) |
| O(3)-S(1)-C(10)     | 108.5(2)   |
| O(2)-S(1)-C(10)     | 106.9(2)   |
| N(1)-S(1)-C(10)     | 106.52(18) |
| C(11)-C(10)-C(15)   | 119.7(4)   |
| C(11)-C(10)-S(1)    | 121.2(4)   |
| C(15)-C(10)-S(1)    | 119.2(3)   |
| C(10)-C(11)-C(12)   | 119.4(4)   |
| C(10)-C(11)-H(11)   | 120.3      |
| C(12)-C(11)-H(11)   | 120.3      |
| C(13)-C(12)-C(11)   | 122.1(4)   |
| C(13)-C(12)-H(12)   | 119.0      |
| C(11)-C(12)-H(12)   | 119.0      |
| C(12)-C(13)-C(14)   | 117.9(4)   |
| C(12)-C(13)-C(16)   | 121.3(5)   |
| C(14)-C(13)-C(16)   | 120.8(5)   |
| C(15)-C(14)-C(13)   | 121.3(4)   |
| C(15)-C(14)-H(14)   | 119.4      |
| C(13)-C(14)-H(14)   | 119.4      |
| C(14)-C(15)-C(10)   | 119.7(4)   |
| C(14)-C(15)-H(15)   | 120.1      |
| C(10)-C(15)-H(15)   | 120.1      |
| C(13)-C(16)-H(16A)  | 109.5      |
| C(13)-C(16)-H(16B)  | 109.5      |
| H(16A)-C(16)-H(16B) | 109.5      |
| C(13)-C(16)-H(16C)  | 109.5      |
| H(16A)-C(16)-H(16C) | 109.5      |
| H(16B)-C(16)-H(16C) | 109.5      |
| C(3)-N(2)-C(17)     | 121.9(3)   |
| C(3)-N(2)-C(18)     | 122.4(3)   |
| C(17)-N(2)-C(18)    | 114.2(3)   |
| N(2)-C(17)-H(17A)   | 109.5      |
| N(2)-C(17)-H(17B)   | 109.5      |
| H(17A)-C(17)-H(17B) | 109.5      |
| N(2)-C(17)-H(17C)   | 109.5      |
| H(17A)-C(17)-H(17C) | 109.5      |
| H(17B)-C(17)-H(17C) | 109.5      |

|                     |          |
|---------------------|----------|
| N(2)-C(18)-H(18A)   | 109.5    |
| N(2)-C(18)-H(18B)   | 109.5    |
| H(18A)-C(18)-H(18B) | 109.5    |
| N(2)-C(18)-H(18C)   | 109.5    |
| H(18A)-C(18)-H(18C) | 109.5    |
| H(18B)-C(18)-H(18C) | 109.5    |
| C(24)-C(19)-C(20)   | 118.5(4) |
| C(24)-C(19)-C(3)    | 120.4(4) |
| C(20)-C(19)-C(3)    | 120.9(4) |
| C(21)-C(20)-C(19)   | 121.3(4) |
| C(21)-C(20)-H(20)   | 119.4    |
| C(19)-C(20)-H(20)   | 119.4    |
| C(22)-C(21)-C(20)   | 119.6(5) |
| C(22)-C(21)-H(21)   | 120.2    |
| C(20)-C(21)-H(21)   | 120.2    |
| C(21)-C(22)-C(23)   | 119.9(5) |
| C(21)-C(22)-H(22)   | 120.1    |
| C(23)-C(22)-H(22)   | 120.1    |
| C(22)-C(23)-C(24)   | 121.2(5) |
| C(22)-C(23)-H(23)   | 119.4    |
| C(24)-C(23)-H(23)   | 119.4    |
| C(23)-C(24)-C(19)   | 119.5(5) |
| C(23)-C(24)-H(24)   | 120.3    |
| C(19)-C(24)-H(24)   | 120.3    |
| O(4)-C(25)-C(26)    | 121.0(4) |
| O(4)-C(25)-C(28)    | 118.6(3) |
| C(26)-C(25)-C(28)   | 119.9(4) |
| C(27)-C(26)-N(3)    | 121.7(3) |
| C(27)-C(26)-C(25)   | 124.2(4) |
| N(3)-C(26)-C(25)    | 114.1(3) |
| N(4)-C(27)-C(26)    | 123.8(4) |
| N(4)-C(27)-C(43)    | 117.7(4) |
| C(26)-C(27)-C(43)   | 118.5(3) |
| C(33)-C(28)-C(29)   | 118.3(4) |
| C(33)-C(28)-C(25)   | 119.7(4) |
| C(29)-C(28)-C(25)   | 121.9(3) |
| C(30)-C(29)-C(28)   | 121.3(4) |



|                   |            |
|-------------------|------------|
| C(30)-C(29)-H(29) | 119.4      |
| C(28)-C(29)-H(29) | 119.4      |
| C(31)-C(30)-C(29) | 119.6(4)   |
| C(31)-C(30)-H(30) | 120.2      |
| C(29)-C(30)-H(30) | 120.2      |
| C(30)-C(31)-C(32) | 119.8(4)   |
| C(30)-C(31)-H(31) | 120.1      |
| C(32)-C(31)-H(31) | 120.1      |
| C(33)-C(32)-C(31) | 120.5(4)   |
| C(33)-C(32)-H(32) | 119.8      |
| C(31)-C(32)-H(32) | 119.8      |
| C(32)-C(33)-C(28) | 120.6(4)   |
| C(32)-C(33)-H(33) | 119.7      |
| C(28)-C(33)-H(33) | 119.7      |
| C(26)-N(3)-S(2)   | 122.6(3)   |
| C(26)-N(3)-H(3A)  | 118.7      |
| S(2)-N(3)-H(3A)   | 118.7      |
| O(5)-S(2)-O(6)    | 118.94(17) |
| O(5)-S(2)-N(3)    | 109.75(17) |
| O(6)-S(2)-N(3)    | 105.19(17) |
| O(5)-S(2)-C(34)   | 106.31(18) |
| O(6)-S(2)-C(34)   | 108.31(18) |
| N(3)-S(2)-C(34)   | 107.93(16) |
| C(35)-C(34)-C(39) | 119.7(4)   |
| C(35)-C(34)-S(2)  | 120.8(3)   |
| C(39)-C(34)-S(2)  | 119.3(3)   |
| C(34)-C(35)-C(36) | 119.3(4)   |
| C(34)-C(35)-H(35) | 120.3      |
| C(36)-C(35)-H(35) | 120.3      |
| C(37)-C(36)-C(35) | 121.9(4)   |
| C(37)-C(36)-H(36) | 119.0      |
| C(35)-C(36)-H(36) | 119.0      |
| C(36)-C(37)-C(38) | 118.1(4)   |
| C(36)-C(37)-C(40) | 121.4(5)   |
| C(38)-C(37)-C(40) | 120.4(5)   |
| C(37)-C(38)-C(39) | 121.3(4)   |
| C(37)-C(38)-H(38) | 119.4      |

|                     |          |
|---------------------|----------|
| C(39)-C(38)-H(38)   | 119.4    |
| C(34)-C(39)-C(38)   | 119.7(4) |
| C(34)-C(39)-H(39)   | 120.2    |
| C(38)-C(39)-H(39)   | 120.2    |
| C(37)-C(40)-H(40A)  | 109.5    |
| C(37)-C(40)-H(40B)  | 109.5    |
| H(40A)-C(40)-H(40B) | 109.5    |
| C(37)-C(40)-H(40C)  | 109.5    |
| H(40A)-C(40)-H(40C) | 109.5    |
| H(40B)-C(40)-H(40C) | 109.5    |
| C(27)-N(4)-C(42)    | 121.7(3) |
| C(27)-N(4)-C(41)    | 121.8(3) |
| C(42)-N(4)-C(41)    | 115.2(3) |
| N(4)-C(41)-H(41A)   | 109.5    |
| N(4)-C(41)-H(41B)   | 109.5    |
| H(41A)-C(41)-H(41B) | 109.5    |
| N(4)-C(41)-H(41C)   | 109.5    |
| H(41A)-C(41)-H(41C) | 109.5    |
| H(41B)-C(41)-H(41C) | 109.5    |
| N(4)-C(42)-H(42A)   | 109.5    |
| N(4)-C(42)-H(42B)   | 109.5    |
| H(42A)-C(42)-H(42B) | 109.5    |
| N(4)-C(42)-H(42C)   | 109.5    |
| H(42A)-C(42)-H(42C) | 109.5    |
| H(42B)-C(42)-H(42C) | 109.5    |
| C(44)-C(43)-C(48)   | 118.7(4) |
| C(44)-C(43)-C(27)   | 120.9(4) |
| C(48)-C(43)-C(27)   | 120.3(4) |
| C(45)-C(44)-C(43)   | 120.0(4) |
| C(45)-C(44)-H(44)   | 120.0    |
| C(43)-C(44)-H(44)   | 120.0    |
| C(44)-C(45)-C(46)   | 120.4(5) |
| C(44)-C(45)-H(45)   | 119.8    |
| C(46)-C(45)-H(45)   | 119.8    |
| C(47)-C(46)-C(45)   | 120.4(5) |
| C(47)-C(46)-H(46)   | 119.8    |
| C(45)-C(46)-H(46)   | 119.8    |

|                   |            |
|-------------------|------------|
| C(48)-C(47)-C(46) | 119.9(5)   |
| C(48)-C(47)-H(47) | 120.1      |
| C(46)-C(47)-H(47) | 120.1      |
| C(47)-C(48)-C(43) | 120.6(4)   |
| C(47)-C(48)-H(48) | 119.7      |
| C(43)-C(48)-H(48) | 119.7      |
| O(7)-C(49)-C(50)  | 122.7(4)   |
| O(7)-C(49)-C(52)  | 118.5(3)   |
| C(50)-C(49)-C(52) | 118.5(4)   |
| C(51)-C(50)-N(5)  | 121.9(3)   |
| C(51)-C(50)-C(49) | 124.4(4)   |
| N(5)-C(50)-C(49)  | 113.7(3)   |
| N(6)-C(51)-C(50)  | 124.8(4)   |
| N(6)-C(51)-C(67)  | 117.6(4)   |
| C(50)-C(51)-C(67) | 117.6(4)   |
| C(53)-C(52)-C(57) | 119.4(4)   |
| C(53)-C(52)-C(49) | 121.6(3)   |
| C(57)-C(52)-C(49) | 118.7(4)   |
| C(54)-C(53)-C(52) | 120.7(4)   |
| C(54)-C(53)-H(53) | 119.6      |
| C(52)-C(53)-H(53) | 119.6      |
| C(53)-C(54)-C(55) | 120.0(5)   |
| C(53)-C(54)-H(54) | 120.0      |
| C(55)-C(54)-H(54) | 120.0      |
| C(56)-C(55)-C(54) | 119.6(4)   |
| C(56)-C(55)-H(55) | 120.2      |
| C(54)-C(55)-H(55) | 120.2      |
| C(55)-C(56)-C(57) | 120.6(4)   |
| C(55)-C(56)-H(56) | 119.7      |
| C(57)-C(56)-H(56) | 119.7      |
| C(56)-C(57)-C(52) | 119.5(4)   |
| C(56)-C(57)-H(57) | 120.2      |
| C(52)-C(57)-H(57) | 120.2      |
| C(50)-N(5)-S(3)   | 122.7(3)   |
| C(50)-N(5)-H(5A)  | 118.6      |
| S(3)-N(5)-H(5A)   | 118.6      |
| O(8)-S(3)-O(9)    | 118.17(17) |

|                     |            |
|---------------------|------------|
| O(8)-S(3)-N(5)      | 110.18(18) |
| O(9)-S(3)-N(5)      | 104.70(18) |
| O(8)-S(3)-C(58)     | 105.8(2)   |
| O(9)-S(3)-C(58)     | 111.3(2)   |
| N(5)-S(3)-C(58)     | 106.11(17) |
| C(59)-C(58)-C(63)   | 120.9(4)   |
| C(59)-C(58)-S(3)    | 119.6(4)   |
| C(63)-C(58)-S(3)    | 119.5(3)   |
| C(58)-C(59)-C(60)   | 119.4(5)   |
| C(58)-C(59)-H(59)   | 120.3      |
| C(60)-C(59)-H(59)   | 120.3      |
| C(59)-C(60)-C(61)   | 121.1(5)   |
| C(59)-C(60)-H(60)   | 119.4      |
| C(61)-C(60)-H(60)   | 119.4      |
| C(62)-C(61)-C(60)   | 118.2(4)   |
| C(62)-C(61)-C(64)   | 119.9(5)   |
| C(60)-C(61)-C(64)   | 121.9(5)   |
| C(63)-C(62)-C(61)   | 120.9(5)   |
| C(63)-C(62)-H(62)   | 119.5      |
| C(61)-C(62)-H(62)   | 119.5      |
| C(58)-C(63)-C(62)   | 119.4(4)   |
| C(58)-C(63)-H(63)   | 120.3      |
| C(62)-C(63)-H(63)   | 120.3      |
| C(61)-C(64)-H(64A)  | 109.5      |
| C(61)-C(64)-H(64B)  | 109.5      |
| H(64A)-C(64)-H(64B) | 109.5      |
| C(61)-C(64)-H(64C)  | 109.5      |
| H(64A)-C(64)-H(64C) | 109.5      |
| H(64B)-C(64)-H(64C) | 109.5      |
| C(51)-N(6)-C(65)    | 122.5(4)   |
| C(51)-N(6)-C(66)    | 120.6(4)   |
| C(65)-N(6)-C(66)    | 115.0(3)   |
| N(6)-C(65)-H(65A)   | 109.5      |
| N(6)-C(65)-H(65B)   | 109.5      |
| H(65A)-C(65)-H(65B) | 109.5      |
| N(6)-C(65)-H(65C)   | 109.5      |
| H(65A)-C(65)-H(65C) | 109.5      |

|                     |          |
|---------------------|----------|
| H(65B)-C(65)-H(65C) | 109.5    |
| N(6)-C(66)-H(66A)   | 109.5    |
| N(6)-C(66)-H(66B)   | 109.5    |
| H(66A)-C(66)-H(66B) | 109.5    |
| N(6)-C(66)-H(66C)   | 109.5    |
| H(66A)-C(66)-H(66C) | 109.5    |
| H(66B)-C(66)-H(66C) | 109.5    |
| C(72)-C(67)-C(68)   | 119.1(4) |
| C(72)-C(67)-C(51)   | 120.8(4) |
| C(68)-C(67)-C(51)   | 120.0(4) |
| C(69)-C(68)-C(67)   | 119.5(4) |
| C(69)-C(68)-H(68)   | 120.3    |
| C(67)-C(68)-H(68)   | 120.3    |
| C(70)-C(69)-C(68)   | 120.7(4) |
| C(70)-C(69)-H(69)   | 119.6    |
| C(68)-C(69)-H(69)   | 119.6    |
| C(71)-C(70)-C(69)   | 119.9(4) |
| C(71)-C(70)-H(70)   | 120.1    |
| C(69)-C(70)-H(70)   | 120.1    |
| C(70)-C(71)-C(72)   | 119.9(4) |
| C(70)-C(71)-H(71)   | 120.0    |
| C(72)-C(71)-H(71)   | 120.0    |
| C(67)-C(72)-C(71)   | 120.8(4) |
| C(67)-C(72)-H(72)   | 119.6    |
| C(71)-C(72)-H(72)   | 119.6    |
| O(10)-C(73)-C(74)   | 120.1(4) |
| O(10)-C(73)-C(76)   | 116.4(3) |
| C(74)-C(73)-C(76)   | 123.0(4) |
| C(75)-C(74)-N(7)    | 120.2(3) |
| C(75)-C(74)-C(73)   | 124.6(4) |
| N(7)-C(74)-C(73)    | 115.0(3) |
| N(8)-C(75)-C(74)    | 124.1(4) |
| N(8)-C(75)-C(91)    | 116.7(3) |
| C(74)-C(75)-C(91)   | 119.2(3) |
| C(77)-C(76)-C(81)   | 118.5(4) |
| C(77)-C(76)-C(73)   | 123.3(4) |
| C(81)-C(76)-C(73)   | 118.0(4) |

|                   |            |
|-------------------|------------|
| C(78)-C(77)-C(76) | 120.8(4)   |
| C(78)-C(77)-H(77) | 119.6      |
| C(76)-C(77)-H(77) | 119.6      |
| C(79)-C(78)-C(77) | 120.5(4)   |
| C(79)-C(78)-H(78) | 119.8      |
| C(77)-C(78)-H(78) | 119.8      |
| C(78)-C(79)-C(80) | 120.0(5)   |
| C(78)-C(79)-H(79) | 120.0      |
| C(80)-C(79)-H(79) | 120.0      |
| C(79)-C(80)-C(81) | 120.1(4)   |
| C(79)-C(80)-H(80) | 120.0      |
| C(81)-C(80)-H(80) | 120.0      |
| C(80)-C(81)-C(76) | 120.2(4)   |
| C(80)-C(81)-H(81) | 119.9      |
| C(76)-C(81)-H(81) | 119.9      |
| C(74)-N(7)-S(4)   | 120.9(3)   |
| C(74)-N(7)-H(7A)  | 119.5      |
| S(4)-N(7)-H(7A)   | 119.5      |
| O(11)-S(4)-O(12)  | 119.31(18) |
| O(11)-S(4)-N(7)   | 107.64(19) |
| O(12)-S(4)-N(7)   | 105.41(17) |
| O(11)-S(4)-C(82)  | 108.4(2)   |
| O(12)-S(4)-C(82)  | 107.56(19) |
| N(7)-S(4)-C(82)   | 108.06(18) |
| C(87)-C(82)-C(83) | 119.8(4)   |
| C(87)-C(82)-S(4)  | 119.4(3)   |
| C(83)-C(82)-S(4)  | 120.8(4)   |
| C(84)-C(83)-C(82) | 119.7(5)   |
| C(84)-C(83)-H(83) | 120.2      |
| C(82)-C(83)-H(83) | 120.2      |
| C(83)-C(84)-C(85) | 121.8(4)   |
| C(83)-C(84)-H(84) | 119.1      |
| C(85)-C(84)-H(84) | 119.1      |
| C(84)-C(85)-C(86) | 117.6(4)   |
| C(84)-C(85)-C(88) | 121.3(4)   |
| C(86)-C(85)-C(88) | 121.1(5)   |
| C(87)-C(86)-C(85) | 120.7(4)   |

|                     |          |
|---------------------|----------|
| C(87)-C(86)-H(86)   | 119.6    |
| C(85)-C(86)-H(86)   | 119.6    |
| C(82)-C(87)-C(86)   | 120.4(4) |
| C(82)-C(87)-H(87)   | 119.8    |
| C(86)-C(87)-H(87)   | 119.8    |
| C(85)-C(88)-H(88A)  | 109.5    |
| C(85)-C(88)-H(88B)  | 109.5    |
| H(88A)-C(88)-H(88B) | 109.5    |
| C(85)-C(88)-H(88C)  | 109.5    |
| H(88A)-C(88)-H(88C) | 109.5    |
| H(88B)-C(88)-H(88C) | 109.5    |
| C(75)-N(8)-C(89)    | 123.0(3) |
| C(75)-N(8)-C(90)    | 122.5(3) |
| C(89)-N(8)-C(90)    | 113.2(3) |
| N(8)-C(89)-H(89A)   | 109.5    |
| N(8)-C(89)-H(89B)   | 109.5    |
| H(89A)-C(89)-H(89B) | 109.5    |
| N(8)-C(89)-H(89C)   | 109.5    |
| H(89A)-C(89)-H(89C) | 109.5    |
| H(89B)-C(89)-H(89C) | 109.5    |
| N(8)-C(90)-H(90A)   | 109.5    |
| N(8)-C(90)-H(90B)   | 109.5    |
| H(90A)-C(90)-H(90B) | 109.5    |
| N(8)-C(90)-H(90C)   | 109.5    |
| H(90A)-C(90)-H(90C) | 109.5    |
| H(90B)-C(90)-H(90C) | 109.5    |
| C(96)-C(91)-C(92)   | 119.5(4) |
| C(96)-C(91)-C(75)   | 118.7(4) |
| C(92)-C(91)-C(75)   | 121.8(4) |
| C(93)-C(92)-C(91)   | 119.9(4) |
| C(93)-C(92)-H(92)   | 120.1    |
| C(91)-C(92)-H(92)   | 120.1    |
| C(92)-C(93)-C(94)   | 120.5(5) |
| C(92)-C(93)-H(93)   | 119.8    |
| C(94)-C(93)-H(93)   | 119.8    |
| C(95)-C(94)-C(93)   | 119.5(4) |
| C(95)-C(94)-H(94)   | 120.3    |

|                   |          |
|-------------------|----------|
| C(93)-C(94)-H(94) | 120.3    |
| C(94)-C(95)-C(96) | 120.4(5) |
| C(94)-C(95)-H(95) | 119.8    |
| C(96)-C(95)-H(95) | 119.8    |
| C(91)-C(96)-C(95) | 120.2(4) |
| C(91)-C(96)-H(96) | 119.9    |
| C(95)-C(96)-H(96) | 119.9    |

---

Symmetry transformations used to generate equivalent atoms:



Table 4. Anisotropic displacement parameters ( $\text{\AA}^2 \times 10^3$ ) for DJL. The anisotropic displacement factor exponent takes the form:  $-2\pi^2 [ h^2 a^{*2} U^{11} + \dots + 2 h k a^* b^* U^{12} ]$

|       | U <sup>11</sup> | U <sup>22</sup> | U <sup>33</sup> | U <sup>23</sup> | U <sup>13</sup> | U <sup>12</sup> |
|-------|-----------------|-----------------|-----------------|-----------------|-----------------|-----------------|
| C(1)  | 51(3)           | 30(2)           | 38(3)           | 3(2)            | 0(2)            | 5(2)            |
| O(1)  | 51(2)           | 43(2)           | 68(2)           | -14(2)          | 0(2)            | 4(2)            |
| C(2)  | 40(3)           | 33(2)           | 46(3)           | 6(2)            | -4(2)           | 2(2)            |
| C(3)  | 45(3)           | 38(2)           | 35(2)           | 1(2)            | -2(2)           | -9(2)           |
| C(4)  | 36(3)           | 35(2)           | 44(3)           | -1(2)           | -1(2)           | -4(2)           |
| C(5)  | 53(3)           | 39(3)           | 42(3)           | 1(2)            | -3(2)           | -7(2)           |
| C(6)  | 58(3)           | 61(3)           | 54(3)           | -11(2)          | 16(3)           | -17(3)          |
| C(7)  | 44(3)           | 93(4)           | 66(4)           | -20(3)          | 5(3)            | -18(3)          |
| C(8)  | 48(3)           | 98(4)           | 52(3)           | -18(3)          | -8(3)           | -18(3)          |
| C(9)  | 45(3)           | 57(3)           | 41(3)           | -6(2)           | -1(2)           | -7(2)           |
| N(1)  | 38(2)           | 43(2)           | 50(2)           | 13(2)           | -5(2)           | -2(2)           |
| S(1)  | 45(1)           | 47(1)           | 66(1)           | 4(1)            | 2(1)            | -6(1)           |
| O(2)  | 74(2)           | 42(2)           | 81(2)           | -6(2)           | 11(2)           | -17(2)          |
| O(3)  | 36(2)           | 83(2)           | 83(2)           | 10(2)           | -3(2)           | 0(2)            |
| C(10) | 37(3)           | 47(3)           | 63(3)           | 11(2)           | 7(2)            | 3(2)            |
| C(11) | 65(4)           | 47(3)           | 73(4)           | 13(3)           | 9(3)            | 1(3)            |
| C(12) | 69(4)           | 61(4)           | 68(4)           | 23(3)           | 12(3)           | 2(3)            |
| C(13) | 45(3)           | 73(4)           | 62(4)           | 13(3)           | 14(2)           | 5(3)            |
| C(14) | 51(3)           | 56(3)           | 64(3)           | -5(3)           | 13(2)           | 1(2)            |
| C(15) | 52(3)           | 40(3)           | 65(3)           | 9(2)            | 14(2)           | 5(2)            |
| C(16) | 78(4)           | 107(5)          | 61(4)           | 7(3)            | 16(3)           | 4(3)            |
| N(2)  | 52(2)           | 40(2)           | 46(2)           | -1(2)           | -8(2)           | 1(2)            |
| C(17) | 67(4)           | 51(3)           | 63(3)           | -11(2)          | -5(3)           | -11(3)          |
| C(18) | 66(3)           | 65(3)           | 44(3)           | 5(2)            | -18(2)          | 1(3)            |
| C(19) | 45(3)           | 27(2)           | 42(3)           | -2(2)           | -4(2)           | -1(2)           |
| C(20) | 60(3)           | 43(3)           | 46(3)           | -1(2)           | 0(2)            | -1(2)           |
| C(21) | 48(3)           | 48(3)           | 90(4)           | -2(3)           | 6(3)            | 9(3)            |
| C(22) | 68(4)           | 49(3)           | 90(5)           | -8(3)           | -21(3)          | 16(3)           |
| C(23) | 92(5)           | 47(3)           | 58(4)           | -2(3)           | -27(3)          | 16(3)           |
| C(24) | 68(3)           | 37(2)           | 40(3)           | 0(2)            | -5(2)           | 4(2)            |
| C(25) | 41(3)           | 27(2)           | 36(3)           | 4(2)            | 2(2)            | 1(2)            |
| O(4)  | 40(2)           | 41(2)           | 42(2)           | -4(1)           | 7(1)            | -3(1)           |

|       |        |        |       |        |        |        |
|-------|--------|--------|-------|--------|--------|--------|
| C(26) | 35(3)  | 31(2)  | 39(2) | 5(2)   | 2(2)   | -2(2)  |
| C(27) | 47(3)  | 34(2)  | 41(3) | 0(2)   | 1(2)   | -4(2)  |
| C(28) | 36(3)  | 30(2)  | 36(2) | 1(2)   | 7(2)   | -2(2)  |
| C(29) | 43(3)  | 40(2)  | 43(3) | 3(2)   | 0(2)   | 1(2)   |
| C(30) | 47(3)  | 54(3)  | 56(3) | 9(2)   | 16(2)  | -11(2) |
| C(31) | 35(3)  | 64(3)  | 75(4) | -8(3)  | 10(3)  | -9(2)  |
| C(32) | 45(3)  | 90(4)  | 51(3) | -8(3)  | -1(2)  | -16(3) |
| C(33) | 42(3)  | 73(3)  | 39(3) | -3(2)  | 1(2)   | -8(3)  |
| N(3)  | 42(2)  | 35(2)  | 43(2) | 5(2)   | -3(2)  | -4(2)  |
| S(2)  | 45(1)  | 41(1)  | 42(1) | 3(1)   | -4(1)  | -12(1) |
| O(5)  | 81(2)  | 51(2)  | 43(2) | -12(2) | -2(2)  | -24(2) |
| O(6)  | 35(2)  | 58(2)  | 62(2) | 12(2)  | -6(1)  | -2(2)  |
| C(34) | 30(2)  | 38(2)  | 42(3) | 1(2)   | 3(2)   | -8(2)  |
| C(35) | 48(3)  | 43(3)  | 50(3) | -2(2)  | 2(2)   | -10(2) |
| C(36) | 46(3)  | 69(3)  | 45(3) | 14(3)  | -3(2)  | -18(3) |
| C(37) | 37(3)  | 73(4)  | 62(3) | 20(3)  | -1(2)  | -6(3)  |
| C(38) | 56(3)  | 40(3)  | 95(4) | 23(3)  | 5(3)   | 9(2)   |
| C(39) | 52(3)  | 43(3)  | 61(3) | -6(2)  | 7(2)   | 2(2)   |
| C(40) | 68(4)  | 119(5) | 86(4) | 62(4)  | -8(3)  | 4(3)   |
| N(4)  | 56(2)  | 42(2)  | 41(2) | -6(2)  | 2(2)   | 0(2)   |
| C(41) | 115(5) | 66(4)  | 58(3) | -25(3) | 0(3)   | 5(3)   |
| C(42) | 65(3)  | 66(3)  | 42(3) | 5(2)   | 0(2)   | 0(3)   |
| C(43) | 47(3)  | 31(2)  | 47(3) | -5(2)  | 2(2)   | 6(2)   |
| C(44) | 61(3)  | 46(3)  | 54(3) | -5(2)  | 12(3)  | 14(3)  |
| C(45) | 54(3)  | 62(3)  | 79(4) | -5(3)  | 13(3)  | 18(3)  |
| C(46) | 62(4)  | 51(3)  | 76(4) | -1(3)  | -7(3)  | 13(3)  |
| C(47) | 67(4)  | 42(3)  | 61(3) | 5(2)   | -6(3)  | 11(3)  |
| C(48) | 59(3)  | 32(2)  | 51(3) | 3(2)   | 0(2)   | 4(2)   |
| C(49) | 38(3)  | 31(2)  | 35(3) | 7(2)   | 2(2)   | 3(2)   |
| O(7)  | 43(2)  | 45(2)  | 46(2) | 1(1)   | 4(1)   | -6(2)  |
| C(50) | 39(3)  | 34(2)  | 36(3) | -4(2)  | -2(2)  | -1(2)  |
| C(51) | 42(3)  | 38(2)  | 40(3) | -3(2)  | 3(2)   | -2(2)  |
| C(52) | 44(3)  | 28(2)  | 38(3) | 5(2)   | -4(2)  | -1(2)  |
| C(53) | 52(3)  | 43(3)  | 39(3) | -11(2) | 0(2)   | -3(2)  |
| C(54) | 58(3)  | 61(3)  | 53(3) | -10(2) | 5(3)   | -5(3)  |
| C(55) | 84(4)  | 55(3)  | 37(3) | -7(2)  | 13(3)  | -10(3) |
| C(56) | 68(4)  | 55(3)  | 46(3) | -4(2)  | -16(3) | -9(3)  |

|       |        |        |       |        |       |        |
|-------|--------|--------|-------|--------|-------|--------|
| C(57) | 50(3)  | 45(3)  | 39(3) | -3(2)  | -2(2) | -4(2)  |
| N(5)  | 53(2)  | 35(2)  | 35(2) | 1(2)   | -8(2) | 4(2)   |
| S(3)  | 53(1)  | 52(1)  | 38(1) | -5(1)  | 0(1)  | -4(1)  |
| O(8)  | 60(2)  | 60(2)  | 59(2) | -20(2) | -3(2) | -21(2) |
| O(9)  | 67(2)  | 76(2)  | 33(2) | 10(2)  | 8(2)  | 6(2)   |
| C(58) | 49(3)  | 43(3)  | 36(2) | -4(2)  | 3(2)  | -8(2)  |
| C(59) | 74(4)  | 48(3)  | 53(3) | -4(2)  | 11(3) | 4(3)   |
| C(60) | 95(4)  | 43(3)  | 58(3) | -4(2)  | 19(3) | -2(3)  |
| C(61) | 83(4)  | 49(3)  | 41(3) | 1(2)   | 10(3) | 26(3)  |
| C(62) | 63(3)  | 58(3)  | 41(3) | -5(2)  | 10(2) | 6(3)   |
| C(63) | 63(3)  | 39(3)  | 38(3) | 0(2)   | 4(2)  | 7(2)   |
| C(64) | 108(5) | 78(4)  | 67(4) | 15(3)  | 9(3)  | 38(4)  |
| N(6)  | 38(2)  | 60(3)  | 57(2) | -7(2)  | -1(2) | -16(2) |
| C(65) | 67(4)  | 80(4)  | 77(4) | -5(3)  | 8(3)  | -37(3) |
| C(66) | 42(3)  | 101(4) | 60(3) | -8(3)  | -5(2) | 1(3)   |
| C(67) | 41(3)  | 34(2)  | 46(3) | -2(2)  | 9(2)  | -3(2)  |
| C(68) | 49(3)  | 57(3)  | 54(3) | 10(2)  | 8(2)  | -1(2)  |
| C(69) | 74(4)  | 62(3)  | 57(3) | 5(3)   | 27(3) | 1(3)   |
| C(70) | 75(4)  | 53(3)  | 51(3) | 11(2)  | 3(3)  | 5(3)   |
| C(71) | 56(3)  | 41(3)  | 58(3) | 7(2)   | 3(3)  | 5(2)   |
| C(72) | 51(3)  | 35(2)  | 43(3) | 3(2)   | 7(2)  | -4(2)  |
| C(73) | 38(3)  | 28(2)  | 50(3) | -6(2)  | 0(2)  | 0(2)   |
| O(10) | 61(2)  | 39(2)  | 50(2) | -3(1)  | -2(2) | 13(2)  |
| C(74) | 37(3)  | 33(2)  | 42(3) | 3(2)   | -3(2) | -1(2)  |
| C(75) | 38(3)  | 34(2)  | 48(3) | 4(2)   | 6(2)  | -1(2)  |
| C(76) | 45(3)  | 25(2)  | 44(3) | 3(2)   | -4(2) | 1(2)   |
| C(77) | 40(3)  | 36(2)  | 55(3) | 1(2)   | -4(2) | -1(2)  |
| C(78) | 50(3)  | 51(3)  | 63(3) | 1(2)   | 15(3) | 1(2)   |
| C(79) | 71(4)  | 64(3)  | 51(3) | 2(3)   | 11(3) | 3(3)   |
| C(80) | 66(4)  | 79(4)  | 47(3) | 1(3)   | -7(3) | 8(3)   |
| C(81) | 48(3)  | 52(3)  | 49(3) | 2(2)   | 1(2)  | 6(2)   |
| N(7)  | 36(2)  | 44(2)  | 39(2) | -1(2)  | -3(2) | -10(2) |
| S(4)  | 52(1)  | 44(1)  | 50(1) | 11(1)  | 7(1)  | -2(1)  |
| O(11) | 76(2)  | 39(2)  | 81(2) | 18(2)  | 19(2) | -2(2)  |
| O(12) | 70(2)  | 77(2)  | 35(2) | 3(2)   | 4(2)  | 1(2)   |
| C(82) | 46(3)  | 42(3)  | 48(3) | -1(2)  | 9(2)  | -10(2) |
| C(83) | 50(3)  | 56(3)  | 69(3) | 3(3)   | 12(3) | -7(3)  |

|       |       |       |        |        |        |        |
|-------|-------|-------|--------|--------|--------|--------|
| C(84) | 57(4) | 68(4) | 63(3)  | -5(3)  | 2(3)   | -22(3) |
| C(85) | 44(3) | 67(3) | 54(3)  | 16(3)  | 10(2)  | -6(3)  |
| C(86) | 55(3) | 46(3) | 74(3)  | 6(2)   | 18(3)  | -9(3)  |
| C(87) | 41(3) | 52(3) | 59(3)  | -1(2)  | 10(2)  | -4(2)  |
| C(88) | 55(4) | 97(4) | 79(4)  | 28(3)  | 6(3)   | -6(3)  |
| N(8)  | 41(2) | 40(2) | 60(2)  | 10(2)  | -4(2)  | 9(2)   |
| C(89) | 60(4) | 48(3) | 109(4) | 30(3)  | -10(3) | 5(3)   |
| C(90) | 49(3) | 70(3) | 58(3)  | 0(3)   | -11(2) | 4(3)   |
| C(91) | 36(3) | 23(2) | 58(3)  | 5(2)   | 1(2)   | 0(2)   |
| C(92) | 46(3) | 38(3) | 71(3)  | -8(2)  | 4(3)   | 0(2)   |
| C(93) | 68(4) | 44(3) | 79(4)  | -13(3) | 18(3)  | -2(3)  |
| C(94) | 74(4) | 39(3) | 68(4)  | -6(2)  | -1(3)  | 0(3)   |
| C(95) | 50(3) | 36(3) | 77(4)  | 4(2)   | -14(3) | -2(2)  |
| C(96) | 48(3) | 37(3) | 59(3)  | 5(2)   | 0(2)   | 1(2)   |

---

Table 5. Hydrogen coordinates ( $\times 10^4$ ) and isotropic displacement parameters ( $\text{\AA}^2 \times 10^{-3}$ ) for DJL.

|        | x    | y    | z     | U(eq) |
|--------|------|------|-------|-------|
| H(5)   | 3523 | 7118 | -463  | 54    |
| H(6)   | 4481 | 7229 | -455  | 69    |
| H(7)   | 5020 | 7475 | 295   | 81    |
| H(8)   | 4590 | 7686 | 1033  | 80    |
| H(9)   | 3633 | 7618 | 1025  | 58    |
| H(1A)  | 1832 | 7493 | -229  | 53    |
| H(11)  | 1624 | 5131 | 1077  | 74    |
| H(12)  | 1843 | 5386 | 1928  | 79    |
| H(14)  | 1852 | 8289 | 1712  | 68    |
| H(15)  | 1625 | 8058 | 861   | 62    |
| H(16A) | 2463 | 7001 | 2510  | 122   |
| H(16B) | 1902 | 6486 | 2654  | 122   |
| H(16C) | 1916 | 7642 | 2565  | 122   |
| H(17A) | 2563 | 4025 | -481  | 91    |
| H(17B) | 2383 | 4207 | -1063 | 91    |
| H(17C) | 1920 | 4163 | -670  | 91    |
| H(18A) | 1597 | 5971 | -860  | 90    |
| H(18B) | 1967 | 5758 | -1317 | 90    |
| H(18C) | 2097 | 6691 | -965  | 90    |
| H(20)  | 3473 | 5085 | -711  | 60    |
| H(21)  | 4314 | 4401 | -403  | 74    |
| H(22)  | 4496 | 4152 | 451   | 84    |
| H(23)  | 3828 | 4523 | 989   | 81    |
| H(24)  | 2984 | 5215 | 691   | 58    |
| H(29)  | 5647 | 4146 | 6978  | 50    |
| H(30)  | 6514 | 4865 | 6937  | 62    |
| H(31)  | 7127 | 4963 | 7655  | 70    |
| H(32)  | 6851 | 4418 | 8418  | 74    |
| H(33)  | 5970 | 3763 | 8467  | 62    |
| H(3A)  | 4133 | 3515 | 7255  | 48    |
| H(35)  | 4220 | 2491 | 8395  | 56    |

|        |      |       |       |     |
|--------|------|-------|-------|-----|
| H(36)  | 4453 | 1563  | 9112  | 65  |
| H(38)  | 4387 | -890  | 8291  | 77  |
| H(39)  | 4169 | 19    | 7565  | 63  |
| H(40A) | 4795 | 22    | 9490  | 138 |
| H(40B) | 4749 | -956  | 9161  | 138 |
| H(40C) | 4208 | -521  | 9389  | 138 |
| H(41A) | 5331 | 820   | 6528  | 120 |
| H(41B) | 5231 | 1328  | 5989  | 120 |
| H(41C) | 4716 | 873   | 6250  | 120 |
| H(42A) | 4202 | 2541  | 6305  | 87  |
| H(42B) | 4654 | 2826  | 5926  | 87  |
| H(42C) | 4606 | 3454  | 6425  | 87  |
| H(44)  | 6136 | 2220  | 6610  | 64  |
| H(45)  | 7000 | 1667  | 6947  | 77  |
| H(46)  | 7096 | 975   | 7743  | 77  |
| H(47)  | 6331 | 831   | 8210  | 69  |
| H(48)  | 5467 | 1403  | 7888  | 57  |
| H(53)  | 3126 | -919  | 9514  | 54  |
| H(54)  | 3227 | -1519 | 8715  | 69  |
| H(55)  | 2448 | -1698 | 8141  | 70  |
| H(56)  | 1566 | -1315 | 8381  | 69  |
| H(57)  | 1456 | -796  | 9198  | 54  |
| H(5A)  | 2824 | -623  | 10847 | 50  |
| H(59)  | 2454 | 2718  | 10830 | 69  |
| H(60)  | 1718 | 3602  | 10428 | 77  |
| H(62)  | 702  | 1279  | 10536 | 65  |
| H(63)  | 1445 | 380   | 10919 | 57  |
| H(64A) | 718  | 3755  | 10159 | 126 |
| H(64B) | 312  | 2854  | 10238 | 126 |
| H(64C) | 672  | 2876  | 9762  | 126 |
| H(65A) | 3392 | 2496  | 9945  | 112 |
| H(65B) | 4026 | 2144  | 10037 | 112 |
| H(65C) | 3675 | 2377  | 10505 | 112 |
| H(66A) | 3768 | 584   | 10841 | 102 |
| H(66B) | 4216 | 566   | 10432 | 102 |
| H(66C) | 3726 | -227  | 10408 | 102 |
| H(68)  | 3403 | 1209  | 9144  | 64  |

|        |       |       |      |     |
|--------|-------|-------|------|-----|
| H(69)  | 2988  | 1810  | 8388 | 75  |
| H(70)  | 2058  | 2279  | 8317 | 71  |
| H(71)  | 1539  | 2165  | 9005 | 62  |
| H(72)  | 1943  | 1549  | 9762 | 52  |
| H(77)  | -605  | 1094  | 8294 | 53  |
| H(78)  | -769  | 1098  | 9136 | 65  |
| H(79)  | -45   | 866   | 9748 | 74  |
| H(80)  | 852   | 581   | 9522 | 77  |
| H(81)  | 1022  | 529   | 8675 | 60  |
| H(7A)  | -145  | 455   | 6867 | 48  |
| H(83)  | 1520  | 2174  | 7037 | 69  |
| H(84)  | 2385  | 1562  | 7324 | 75  |
| H(86)  | 1894  | -1149 | 6891 | 69  |
| H(87)  | 1024  | -533  | 6608 | 60  |
| H(88A) | 3089  | 49    | 7150 | 115 |
| H(88B) | 2808  | -965  | 7288 | 115 |
| H(88C) | 2875  | -105  | 7694 | 115 |
| H(89A) | -317  | 4040  | 7357 | 110 |
| H(89B) | -970  | 3911  | 7204 | 110 |
| H(89C) | -538  | 3864  | 6783 | 110 |
| H(90A) | -682  | 2032  | 6522 | 90  |
| H(90B) | -1238 | 2407  | 6749 | 90  |
| H(90C) | -941  | 1426  | 6958 | 90  |
| H(92)  | -648  | 3114  | 8262 | 62  |
| H(93)  | -257  | 3940  | 8968 | 76  |
| H(94)  | 696   | 4276  | 9056 | 73  |
| H(95)  | 1258  | 3743  | 8448 | 66  |
| H(96)  | 882   | 2805  | 7774 | 58  |

---

Table 6. Torsion angles [°] for DJL.

---

|                         |           |
|-------------------------|-----------|
| O(1)-C(1)-C(2)-C(3)     | -163.9(4) |
| C(4)-C(1)-C(2)-C(3)     | 20.8(6)   |
| O(1)-C(1)-C(2)-N(1)     | 16.3(5)   |
| C(4)-C(1)-C(2)-N(1)     | -159.0(3) |
| N(1)-C(2)-C(3)-N(2)     | 24.5(6)   |
| C(1)-C(2)-C(3)-N(2)     | -155.3(4) |
| N(1)-C(2)-C(3)-C(19)    | -156.1(4) |
| C(1)-C(2)-C(3)-C(19)    | 24.1(6)   |
| O(1)-C(1)-C(4)-C(9)     | 38.0(5)   |
| C(2)-C(1)-C(4)-C(9)     | -146.6(4) |
| O(1)-C(1)-C(4)-C(5)     | -137.5(4) |
| C(2)-C(1)-C(4)-C(5)     | 37.9(6)   |
| C(9)-C(4)-C(5)-C(6)     | 2.3(6)    |
| C(1)-C(4)-C(5)-C(6)     | 177.8(4)  |
| C(4)-C(5)-C(6)-C(7)     | 0.1(7)    |
| C(5)-C(6)-C(7)-C(8)     | -1.8(7)   |
| C(6)-C(7)-C(8)-C(9)     | 0.9(8)    |
| C(7)-C(8)-C(9)-C(4)     | 1.7(7)    |
| C(5)-C(4)-C(9)-C(8)     | -3.2(6)   |
| C(1)-C(4)-C(9)-C(8)     | -179.0(4) |
| C(3)-C(2)-N(1)-S(1)     | 71.6(4)   |
| C(1)-C(2)-N(1)-S(1)     | -108.5(3) |
| C(2)-N(1)-S(1)-O(3)     | -178.6(3) |
| C(2)-N(1)-S(1)-O(2)     | -48.6(3)  |
| C(2)-N(1)-S(1)-C(10)    | 66.1(3)   |
| O(3)-S(1)-C(10)-C(11)   | 121.9(4)  |
| O(2)-S(1)-C(10)-C(11)   | -9.1(4)   |
| N(1)-S(1)-C(10)-C(11)   | -124.6(4) |
| O(3)-S(1)-C(10)-C(15)   | -57.9(4)  |
| O(2)-S(1)-C(10)-C(15)   | 171.1(3)  |
| N(1)-S(1)-C(10)-C(15)   | 55.6(4)   |
| C(15)-C(10)-C(11)-C(12) | -0.6(7)   |
| S(1)-C(10)-C(11)-C(12)  | 179.6(4)  |
| C(10)-C(11)-C(12)-C(13) | -0.6(7)   |
| C(11)-C(12)-C(13)-C(14) | 1.4(7)    |



|                         |           |
|-------------------------|-----------|
| C(11)-C(12)-C(13)-C(16) | -176.5(4) |
| C(12)-C(13)-C(14)-C(15) | -1.0(7)   |
| C(16)-C(13)-C(14)-C(15) | 176.9(4)  |
| C(13)-C(14)-C(15)-C(10) | -0.1(7)   |
| C(11)-C(10)-C(15)-C(14) | 0.9(7)    |
| S(1)-C(10)-C(15)-C(14)  | -179.3(3) |
| C(2)-C(3)-N(2)-C(17)    | -144.9(4) |
| C(19)-C(3)-N(2)-C(17)   | 35.7(6)   |
| C(2)-C(3)-N(2)-C(18)    | 20.7(6)   |
| C(19)-C(3)-N(2)-C(18)   | -158.8(4) |
| N(2)-C(3)-C(19)-C(24)   | -134.5(4) |
| C(2)-C(3)-C(19)-C(24)   | 46.0(6)   |
| N(2)-C(3)-C(19)-C(20)   | 51.0(5)   |
| C(2)-C(3)-C(19)-C(20)   | -128.5(4) |
| C(24)-C(19)-C(20)-C(21) | -2.4(6)   |
| C(3)-C(19)-C(20)-C(21)  | 172.3(4)  |
| C(19)-C(20)-C(21)-C(22) | 0.5(7)    |
| C(20)-C(21)-C(22)-C(23) | 1.5(7)    |
| C(21)-C(22)-C(23)-C(24) | -1.7(8)   |
| C(22)-C(23)-C(24)-C(19) | -0.2(7)   |
| C(20)-C(19)-C(24)-C(23) | 2.2(6)    |
| C(3)-C(19)-C(24)-C(23)  | -172.5(4) |
| O(4)-C(25)-C(26)-C(27)  | -162.4(4) |
| C(28)-C(25)-C(26)-C(27) | 25.8(5)   |
| O(4)-C(25)-C(26)-N(3)   | 20.9(5)   |
| C(28)-C(25)-C(26)-N(3)  | -150.9(3) |
| N(3)-C(26)-C(27)-N(4)   | 28.0(6)   |
| C(25)-C(26)-C(27)-N(4)  | -148.5(4) |
| N(3)-C(26)-C(27)-C(43)  | -150.1(3) |
| C(25)-C(26)-C(27)-C(43) | 33.4(6)   |
| O(4)-C(25)-C(28)-C(33)  | 41.7(5)   |
| C(26)-C(25)-C(28)-C(33) | -146.3(4) |
| O(4)-C(25)-C(28)-C(29)  | -134.0(4) |
| C(26)-C(25)-C(28)-C(29) | 38.1(5)   |
| C(33)-C(28)-C(29)-C(30) | 0.3(6)    |
| C(25)-C(28)-C(29)-C(30) | 176.0(4)  |
| C(28)-C(29)-C(30)-C(31) | 1.5(6)    |

|                         |           |
|-------------------------|-----------|
| C(29)-C(30)-C(31)-C(32) | -1.8(7)   |
| C(30)-C(31)-C(32)-C(33) | 0.3(7)    |
| C(31)-C(32)-C(33)-C(28) | 1.5(7)    |
| C(29)-C(28)-C(33)-C(32) | -1.8(6)   |
| C(25)-C(28)-C(33)-C(32) | -177.6(4) |
| C(27)-C(26)-N(3)-S(2)   | 63.4(4)   |
| C(25)-C(26)-N(3)-S(2)   | -119.8(3) |
| C(26)-N(3)-S(2)-O(5)    | -69.4(3)  |
| C(26)-N(3)-S(2)-O(6)    | 161.5(3)  |
| C(26)-N(3)-S(2)-C(34)   | 46.0(3)   |
| O(5)-S(2)-C(34)-C(35)   | 170.9(3)  |
| O(6)-S(2)-C(34)-C(35)   | -60.2(4)  |
| N(3)-S(2)-C(34)-C(35)   | 53.2(4)   |
| O(5)-S(2)-C(34)-C(39)   | -15.5(4)  |
| O(6)-S(2)-C(34)-C(39)   | 113.4(4)  |
| N(3)-S(2)-C(34)-C(39)   | -133.2(3) |
| C(39)-C(34)-C(35)-C(36) | -1.9(6)   |
| S(2)-C(34)-C(35)-C(36)  | 171.7(3)  |
| C(34)-C(35)-C(36)-C(37) | -0.4(7)   |
| C(35)-C(36)-C(37)-C(38) | 1.9(7)    |
| C(35)-C(36)-C(37)-C(40) | -177.4(4) |
| C(36)-C(37)-C(38)-C(39) | -1.3(7)   |
| C(40)-C(37)-C(38)-C(39) | 178.0(4)  |
| C(35)-C(34)-C(39)-C(38) | 2.5(6)    |
| S(2)-C(34)-C(39)-C(38)  | -171.2(3) |
| C(37)-C(38)-C(39)-C(34) | -0.9(7)   |
| C(26)-C(27)-N(4)-C(42)  | 23.8(6)   |
| C(43)-C(27)-N(4)-C(42)  | -158.1(4) |
| C(26)-C(27)-N(4)-C(41)  | -142.7(4) |
| C(43)-C(27)-N(4)-C(41)  | 35.4(6)   |
| N(4)-C(27)-C(43)-C(44)  | 46.8(5)   |
| C(26)-C(27)-C(43)-C(44) | -135.0(4) |
| N(4)-C(27)-C(43)-C(48)  | -136.9(4) |
| C(26)-C(27)-C(43)-C(48) | 41.3(5)   |
| C(48)-C(43)-C(44)-C(45) | -2.2(6)   |
| C(27)-C(43)-C(44)-C(45) | 174.1(4)  |
| C(43)-C(44)-C(45)-C(46) | 1.4(7)    |

|                         |           |
|-------------------------|-----------|
| C(44)-C(45)-C(46)-C(47) | 0.1(7)    |
| C(45)-C(46)-C(47)-C(48) | -0.7(7)   |
| C(46)-C(47)-C(48)-C(43) | -0.2(6)   |
| C(44)-C(43)-C(48)-C(47) | 1.6(6)    |
| C(27)-C(43)-C(48)-C(47) | -174.7(4) |
| O(7)-C(49)-C(50)-C(51)  | -152.3(4) |
| C(52)-C(49)-C(50)-C(51) | 34.2(6)   |
| O(7)-C(49)-C(50)-N(5)   | 27.9(5)   |
| C(52)-C(49)-C(50)-N(5)  | -145.6(3) |
| N(5)-C(50)-C(51)-N(6)   | 26.9(6)   |
| C(49)-C(50)-C(51)-N(6)  | -152.9(4) |
| N(5)-C(50)-C(51)-C(67)  | -153.2(3) |
| C(49)-C(50)-C(51)-C(67) | 27.0(6)   |
| O(7)-C(49)-C(52)-C(53)  | -138.7(4) |
| C(50)-C(49)-C(52)-C(53) | 35.1(5)   |
| O(7)-C(49)-C(52)-C(57)  | 35.9(5)   |
| C(50)-C(49)-C(52)-C(57) | -150.3(4) |
| C(57)-C(52)-C(53)-C(54) | 1.6(6)    |
| C(49)-C(52)-C(53)-C(54) | 176.1(4)  |
| C(52)-C(53)-C(54)-C(55) | 0.8(6)    |
| C(53)-C(54)-C(55)-C(56) | -1.2(7)   |
| C(54)-C(55)-C(56)-C(57) | -0.7(7)   |
| C(55)-C(56)-C(57)-C(52) | 3.0(6)    |
| C(53)-C(52)-C(57)-C(56) | -3.5(6)   |
| C(49)-C(52)-C(57)-C(56) | -178.1(4) |
| C(51)-C(50)-N(5)-S(3)   | 64.5(5)   |
| C(49)-C(50)-N(5)-S(3)   | -115.7(3) |
| C(50)-N(5)-S(3)-O(8)    | -79.8(3)  |
| C(50)-N(5)-S(3)-O(9)    | 152.2(3)  |
| C(50)-N(5)-S(3)-C(58)   | 34.3(4)   |
| O(8)-S(3)-C(58)-C(59)   | 6.6(4)    |
| O(9)-S(3)-C(58)-C(59)   | 136.2(3)  |
| N(5)-S(3)-C(58)-C(59)   | -110.5(4) |
| O(8)-S(3)-C(58)-C(63)   | -175.4(3) |
| O(9)-S(3)-C(58)-C(63)   | -45.8(4)  |
| N(5)-S(3)-C(58)-C(63)   | 67.5(4)   |
| C(63)-C(58)-C(59)-C(60) | -2.2(6)   |

|                         |           |
|-------------------------|-----------|
| S(3)-C(58)-C(59)-C(60)  | 175.7(3)  |
| C(58)-C(59)-C(60)-C(61) | -0.1(7)   |
| C(59)-C(60)-C(61)-C(62) | 3.2(7)    |
| C(59)-C(60)-C(61)-C(64) | -174.5(4) |
| C(60)-C(61)-C(62)-C(63) | -4.0(6)   |
| C(64)-C(61)-C(62)-C(63) | 173.7(4)  |
| C(59)-C(58)-C(63)-C(62) | 1.4(6)    |
| S(3)-C(58)-C(63)-C(62)  | -176.6(3) |
| C(61)-C(62)-C(63)-C(58) | 1.9(6)    |
| C(50)-C(51)-N(6)-C(65)  | -139.2(4) |
| C(67)-C(51)-N(6)-C(65)  | 40.9(6)   |
| C(50)-C(51)-N(6)-C(66)  | 24.4(6)   |
| C(67)-C(51)-N(6)-C(66)  | -155.5(4) |
| N(6)-C(51)-C(67)-C(72)  | -137.4(4) |
| C(50)-C(51)-C(67)-C(72) | 42.7(5)   |
| N(6)-C(51)-C(67)-C(68)  | 45.3(5)   |
| C(50)-C(51)-C(67)-C(68) | -134.7(4) |
| C(72)-C(67)-C(68)-C(69) | -2.5(6)   |
| C(51)-C(67)-C(68)-C(69) | 174.9(4)  |
| C(67)-C(68)-C(69)-C(70) | 1.2(7)    |
| C(68)-C(69)-C(70)-C(71) | 0.5(7)    |
| C(69)-C(70)-C(71)-C(72) | -0.9(7)   |
| C(68)-C(67)-C(72)-C(71) | 2.1(6)    |
| C(51)-C(67)-C(72)-C(71) | -175.3(4) |
| C(70)-C(71)-C(72)-C(67) | -0.4(6)   |
| O(10)-C(73)-C(74)-C(75) | -163.2(4) |
| C(76)-C(73)-C(74)-C(75) | 25.3(6)   |
| O(10)-C(73)-C(74)-N(7)  | 13.0(5)   |
| C(76)-C(73)-C(74)-N(7)  | -158.5(3) |
| N(7)-C(74)-C(75)-N(8)   | 27.1(6)   |
| C(73)-C(74)-C(75)-N(8)  | -156.9(4) |
| N(7)-C(74)-C(75)-C(91)  | -149.8(4) |
| C(73)-C(74)-C(75)-C(91) | 26.2(6)   |
| O(10)-C(73)-C(76)-C(77) | -132.9(4) |
| C(74)-C(73)-C(76)-C(77) | 38.9(6)   |
| O(10)-C(73)-C(76)-C(81) | 41.6(5)   |
| C(74)-C(73)-C(76)-C(81) | -146.6(4) |

|                         |           |
|-------------------------|-----------|
| C(81)-C(76)-C(77)-C(78) | 0.5(6)    |
| C(73)-C(76)-C(77)-C(78) | 175.0(4)  |
| C(76)-C(77)-C(78)-C(79) | 0.7(6)    |
| C(77)-C(78)-C(79)-C(80) | -1.1(7)   |
| C(78)-C(79)-C(80)-C(81) | 0.1(7)    |
| C(79)-C(80)-C(81)-C(76) | 1.2(7)    |
| C(77)-C(76)-C(81)-C(80) | -1.5(6)   |
| C(73)-C(76)-C(81)-C(80) | -176.3(4) |
| C(75)-C(74)-N(7)-S(4)   | 74.8(4)   |
| C(73)-C(74)-N(7)-S(4)   | -101.5(4) |
| C(74)-N(7)-S(4)-O(11)   | -43.9(3)  |
| C(74)-N(7)-S(4)-O(12)   | -172.2(3) |
| C(74)-N(7)-S(4)-C(82)   | 73.0(3)   |
| O(11)-S(4)-C(82)-C(87)  | -173.4(3) |
| O(12)-S(4)-C(82)-C(87)  | -43.2(4)  |
| N(7)-S(4)-C(82)-C(87)   | 70.2(4)   |
| O(11)-S(4)-C(82)-C(83)  | 7.6(4)    |
| O(12)-S(4)-C(82)-C(83)  | 137.9(4)  |
| N(7)-S(4)-C(82)-C(83)   | -108.7(4) |
| C(87)-C(82)-C(83)-C(84) | 0.0(7)    |
| S(4)-C(82)-C(83)-C(84)  | 178.9(3)  |
| C(82)-C(83)-C(84)-C(85) | -0.4(7)   |
| C(83)-C(84)-C(85)-C(86) | 0.9(7)    |
| C(83)-C(84)-C(85)-C(88) | 180.0(4)  |
| C(84)-C(85)-C(86)-C(87) | -1.1(7)   |
| C(88)-C(85)-C(86)-C(87) | 179.8(4)  |
| C(83)-C(82)-C(87)-C(86) | -0.2(7)   |
| S(4)-C(82)-C(87)-C(86)  | -179.1(3) |
| C(85)-C(86)-C(87)-C(82) | 0.8(7)    |
| C(74)-C(75)-N(8)-C(89)  | -150.5(4) |
| C(91)-C(75)-N(8)-C(89)  | 26.4(6)   |
| C(74)-C(75)-N(8)-C(90)  | 15.8(6)   |
| C(91)-C(75)-N(8)-C(90)  | -167.3(4) |
| N(8)-C(75)-C(91)-C(96)  | -122.0(4) |
| C(74)-C(75)-C(91)-C(96) | 55.1(5)   |
| N(8)-C(75)-C(91)-C(92)  | 59.1(5)   |
| C(74)-C(75)-C(91)-C(92) | -123.7(4) |

|                         |           |
|-------------------------|-----------|
| C(96)-C(91)-C(92)-C(93) | -3.1(6)   |
| C(75)-C(91)-C(92)-C(93) | 175.7(4)  |
| C(91)-C(92)-C(93)-C(94) | 3.4(7)    |
| C(92)-C(93)-C(94)-C(95) | -0.8(7)   |
| C(93)-C(94)-C(95)-C(96) | -1.9(7)   |
| C(92)-C(91)-C(96)-C(95) | 0.4(6)    |
| C(75)-C(91)-C(96)-C(95) | -178.5(4) |
| C(94)-C(95)-C(96)-C(91) | 2.2(6)    |

---

Symmetry transformations used to generate equivalent atoms:
